# Supplementary material for: Fruit and vegetable intake and risk of type 2 diabetes mellitus: meta-analysis of prospective cohort studies
Source: PubMed Central journal article supplement — BMJ Open. 2014 Nov 5;4(11):e005497. doi: 10.1136/bmjopen-2014-005497 (PMC4225228; doi:10.1136/bmjopen-2014-005497), 2014-11-05
Supplement: bmjopen-2014-005497.draft_revisions.pdf [file bmjopen-2014-005497.draft_revisions.pdf]

# BMJ Open

## Fruit and vegetable intake and risk of type 2 diabetes mellitus: meta-analysis of prospective cohort studies

|                                 |                                                                                                                                                                                                                                                                                                                                                                                                                                                                                                                                                                                                                                                                                                                                                                                                                           |
|---------------------------------|---------------------------------------------------------------------------------------------------------------------------------------------------------------------------------------------------------------------------------------------------------------------------------------------------------------------------------------------------------------------------------------------------------------------------------------------------------------------------------------------------------------------------------------------------------------------------------------------------------------------------------------------------------------------------------------------------------------------------------------------------------------------------------------------------------------------------|
| Journal:                        | <i>BMJ Open</i>                                                                                                                                                                                                                                                                                                                                                                                                                                                                                                                                                                                                                                                                                                                                                                                                           |
| Manuscript ID:                  | bmjopen-2014-005497                                                                                                                                                                                                                                                                                                                                                                                                                                                                                                                                                                                                                                                                                                                                                                                                       |
| Article Type:                   | Research                                                                                                                                                                                                                                                                                                                                                                                                                                                                                                                                                                                                                                                                                                                                                                                                                  |
| Date Submitted by the Author:   | 22-Apr-2014                                                                                                                                                                                                                                                                                                                                                                                                                                                                                                                                                                                                                                                                                                                                                                                                               |
| Complete List of Authors:       | Tang, Zhenyu; The Second Affiliated Hospital of Nanchang University, Nanchang 330006, Jiangxi Province, People's Republic of China, Department of Neurology<br>Li, Min; The Second Affiliated Hospital of Nanchang University, Nanchang 330006, Jiangxi Province, People's Republic of China, Department of Neurology<br>Fan, Yingli; The Second Affiliated Hospital of Nanchang University, Nanchang 330006, Jiangxi Province, People's Republic of China, Department of Cardiovascular<br>Zhang, Xiaowei; The Second Affiliated Hospital of Nanchang University, Nanchang 330006, Jiangxi Province, People's Republic of China, Department of Neurology<br>Hou, Wenshang; The Second Affiliated Hospital of Nanchang University, Nanchang 330006, Jiangxi Province, People's Republic of China, Department of Neurology |
| <b>Primary Subject Heading</b>: | Diabetes and endocrinology                                                                                                                                                                                                                                                                                                                                                                                                                                                                                                                                                                                                                                                                                                                                                                                                |
| Secondary Subject Heading:      | Diabetes and endocrinology, Public health                                                                                                                                                                                                                                                                                                                                                                                                                                                                                                                                                                                                                                                                                                                                                                                 |
| Keywords:                       | General diabetes < DIABETES & ENDOCRINOLOGY, Quality in health care < HEALTH SERVICES ADMINISTRATION & MANAGEMENT, Diabetes & endocrinology < INTERNAL MEDICINE                                                                                                                                                                                                                                                                                                                                                                                                                                                                                                                                                                                                                                                           |
|                                 |                                                                                                                                                                                                                                                                                                                                                                                                                                                                                                                                                                                                                                                                                                                                                                                                                           |

SCHOLARONE™  
Manuscripts

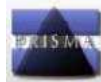

# PRISMA 2009 Checklist

1  
2  
3  
4  
5  
6  
7  
8  
9  
10  
11  
12  
13  
14  
15  
16  
17  
18  
19  
20  
21  
22  
23  
24  
25  
26  
27  
28  
29  
30  
31  
32  
33  
34  
35  
36  
37  
38  
39  
40  
41  
42  
43  
44  
45  
46  
47  
48  
49

| Section/topic                      | #  | Checklist item                                                                                                                                                                                                                                                                                              | Reported on page # |
|------------------------------------|----|-------------------------------------------------------------------------------------------------------------------------------------------------------------------------------------------------------------------------------------------------------------------------------------------------------------|--------------------|
| <b>TITLE</b>                       |    |                                                                                                                                                                                                                                                                                                             |                    |
| Title                              | 1  | Identify the report as a systematic review, meta-analysis, or both.                                                                                                                                                                                                                                         | 1                  |
| <b>ABSTRACT</b>                    |    |                                                                                                                                                                                                                                                                                                             |                    |
| Structured summary                 | 2  | Provide a structured summary including, as applicable: background; objectives; data sources; study eligibility criteria, participants, and interventions; study appraisal and synthesis methods; results; limitations; conclusions and implications of key findings; systematic review registration number. | 2                  |
| <b>INTRODUCTION</b>                |    |                                                                                                                                                                                                                                                                                                             |                    |
| Rationale                          | 3  | Describe the rationale for the review in the context of what is already known.                                                                                                                                                                                                                              | 3                  |
| Objectives                         | 4  | Provide an explicit statement of questions being addressed with reference to participants, interventions, comparisons, outcomes, and study design (PICOS).                                                                                                                                                  | 3                  |
| <b>METHODS</b>                     |    |                                                                                                                                                                                                                                                                                                             |                    |
| Protocol and registration          | 5  | Indicate if a review protocol exists, if and where it can be accessed (e.g., Web address), and, if available, provide registration information including registration number.                                                                                                                               | No                 |
| Eligibility criteria               | 6  | Specify study characteristics (e.g., PICOS, length of follow-up) and report characteristics (e.g., years considered, language, publication status) used as criteria for eligibility, giving rationale.                                                                                                      | 3                  |
| Information sources                | 7  | Describe all information sources (e.g., databases with dates of coverage, contact with study authors to identify additional studies) in the search and date last searched.                                                                                                                                  | 3                  |
| Search                             | 8  | Present full electronic search strategy for at least one database, including any limits used, such that it could be repeated.                                                                                                                                                                               | 3                  |
| Study selection                    | 9  | State the process for selecting studies (i.e., screening, eligibility, included in systematic review, and, if applicable, included in the meta-analysis).                                                                                                                                                   | 4                  |
| Data collection process            | 10 | Describe method of data extraction from reports (e.g., piloted forms, independently, in duplicate) and any processes for obtaining and confirming data from investigators.                                                                                                                                  | 4                  |
| Data items                         | 11 | List and define all variables for which data were sought (e.g., PICOS, funding sources) and any assumptions and simplifications made.                                                                                                                                                                       | 4                  |
| Risk of bias in individual studies | 12 | Describe methods used for assessing risk of bias of individual studies (including specification of whether this was done at the study or outcome level), and how this information is to be used in any data synthesis.                                                                                      | No                 |
| Summary measures                   | 13 | State the principal summary measures (e.g., risk ratio, difference in means).                                                                                                                                                                                                                               | 4,5                |
| Synthesis of results               | 14 | Describe the methods of handling data and combining results of studies, if done, including measures of consistency (e.g., $I^2$ for each meta-analysis).                                                                                                                                                    | 4,5                |

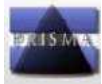

# PRISMA 2009 Checklist

Page 1 of 2

| Section/topic                 | #  | Checklist item                                                                                                                                                                                           | Reported on page # |
|-------------------------------|----|----------------------------------------------------------------------------------------------------------------------------------------------------------------------------------------------------------|--------------------|
| Risk of bias across studies   | 15 | Specify any assessment of risk of bias that may affect the cumulative evidence (e.g., publication bias, selective reporting within studies).                                                             | 5                  |
| Additional analyses           | 16 | Describe methods of additional analyses (e.g., sensitivity or subgroup analyses, meta-regression), if done, indicating which were pre-specified.                                                         | 5                  |
| <b>RESULTS</b>                |    |                                                                                                                                                                                                          |                    |
| Study selection               | 17 | Give numbers of studies screened, assessed for eligibility, and included in the review, with reasons for exclusions at each stage, ideally with a flow diagram.                                          | 5                  |
| Study characteristics         | 18 | For each study, present characteristics for which data were extracted (e.g., study size, PICOS, follow-up period) and provide the citations.                                                             | 5,6                |
| Risk of bias within studies   | 19 | Present data on risk of bias of each study and, if available, any outcome level assessment (see item 12).                                                                                                | No                 |
| Results of individual studies | 20 | For all outcomes considered (benefits or harms), present, for each study: (a) simple summary data for each intervention group (b) effect estimates and confidence intervals, ideally with a forest plot. | 6,7                |
| Synthesis of results          | 21 | Present results of each meta-analysis done, including confidence intervals and measures of consistency.                                                                                                  | 6,7                |
| Risk of bias across studies   | 22 | Present results of any assessment of risk of bias across studies (see Item 15).                                                                                                                          | 7                  |
| Additional analysis           | 23 | Give results of additional analyses, if done (e.g., sensitivity or subgroup analyses, meta-regression [see Item 16]).                                                                                    | 7                  |
| <b>DISCUSSION</b>             |    |                                                                                                                                                                                                          |                    |
| Summary of evidence           | 24 | Summarize the main findings including the strength of evidence for each main outcome; consider their relevance to key groups (e.g., healthcare providers, users, and policy makers).                     | 7,8                |
| Limitations                   | 25 | Discuss limitations at study and outcome level (e.g., risk of bias), and at review-level (e.g., incomplete retrieval of identified research, reporting bias).                                            | 9                  |
| Conclusions                   | 26 | Provide a general interpretation of the results in the context of other evidence, and implications for future research.                                                                                  | 9                  |
| <b>FUNDING</b>                |    |                                                                                                                                                                                                          |                    |
| Funding                       | 27 | Describe sources of funding for the systematic review and other support (e.g., supply of data); role of funders for the systematic review.                                                               | No                 |

From: Moher D, Liberati A, Tetzlaff J, Altman DG, The PRISMA Group (2009). Preferred Reporting Items for Systematic Reviews and Meta-Analyses: The PRISMA Statement. PLoS Med 6(6): e1000097. doi:10.1371/journal.pmed1000097

For more information, visit: [www.prisma-statement.org](http://www.prisma-statement.org).

Page 2 of 2

For peer review only - <http://bmjopen.bmj.com/site/about/guidelines.xhtml>

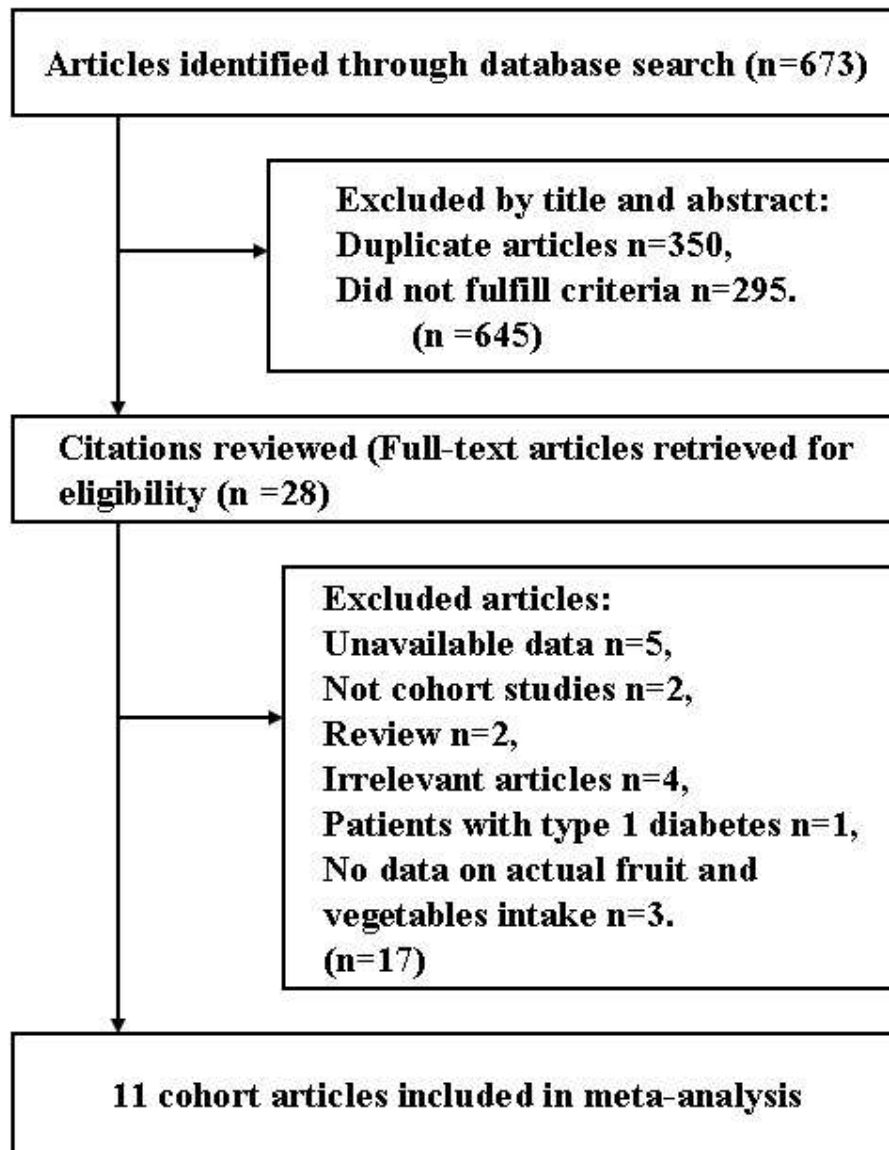

42 **Fig 1** Process of literature search and study selection

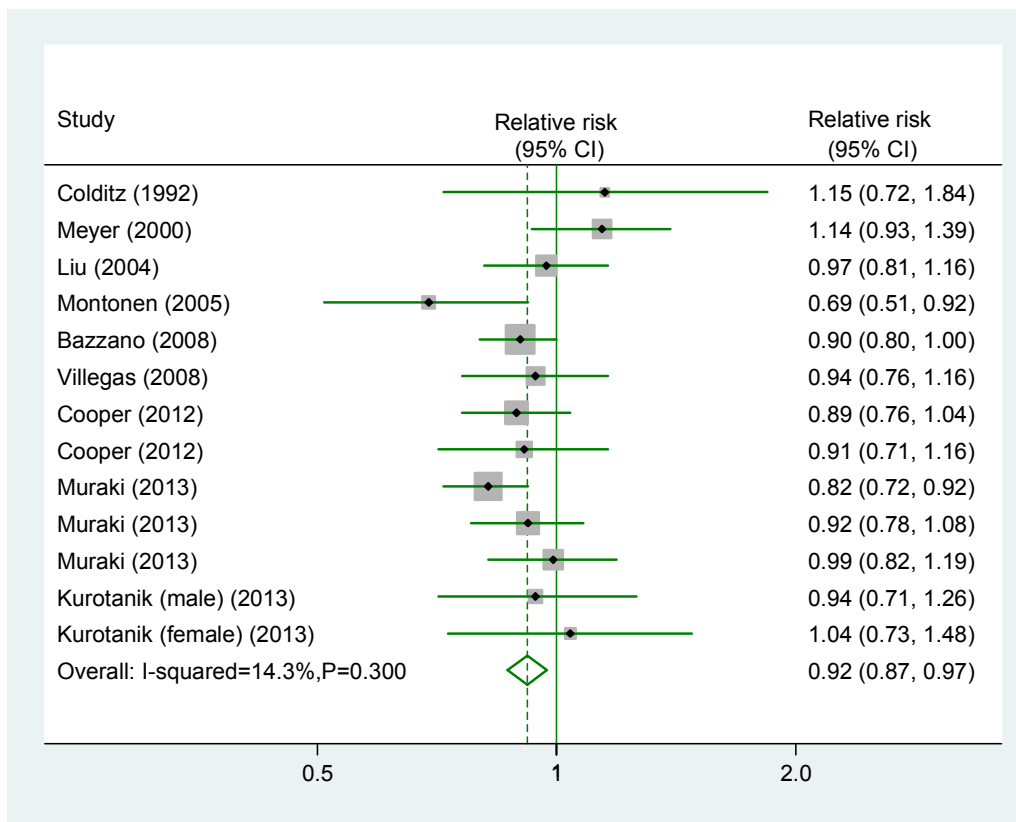

**Fig 2** Random effects analysis of fully adjusted studies for the association between fruit intake and risk of type 2 diabetes

1  
2  
3  
4  
5  
6  
7  
8  
9  
10  
11  
12  
13  
14  
15  
16  
17  
18  
19  
20  
21  
22  
23  
24  
25  
26  
27  
28  
29  
30  
31  
32  
33  
34  
35  
36  
37  
38  
39  
40  
41  
42  
43  
44  
45  
46  
47  
48  
49  
50  
51  
52  
53  
54  
55  
56  
57  
58  
59  
60

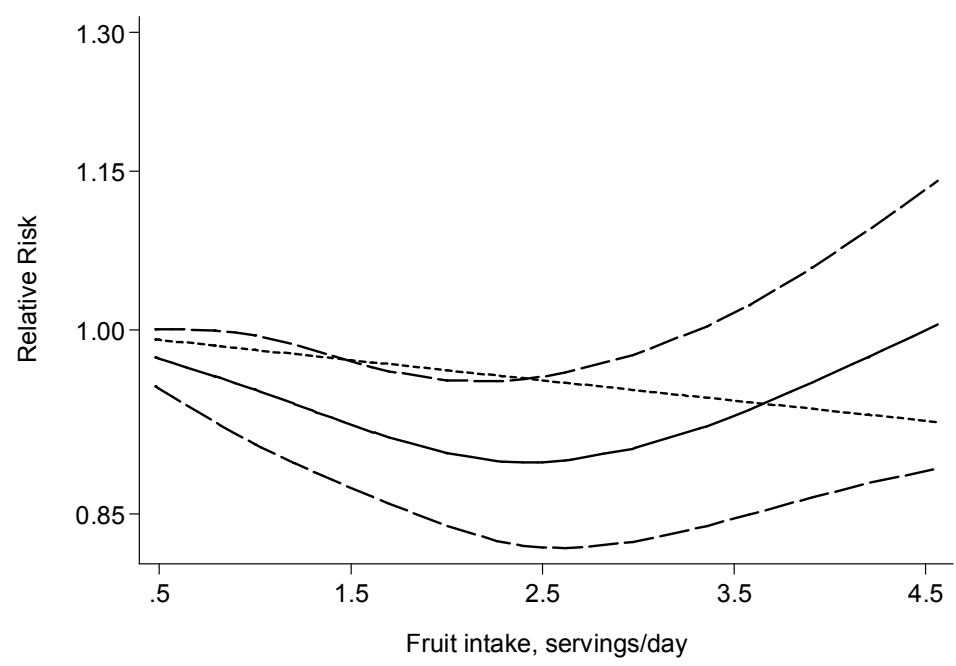

**Fig 3** Dose-response analyses of fruit intake and risk of type 2 diabetes

review only

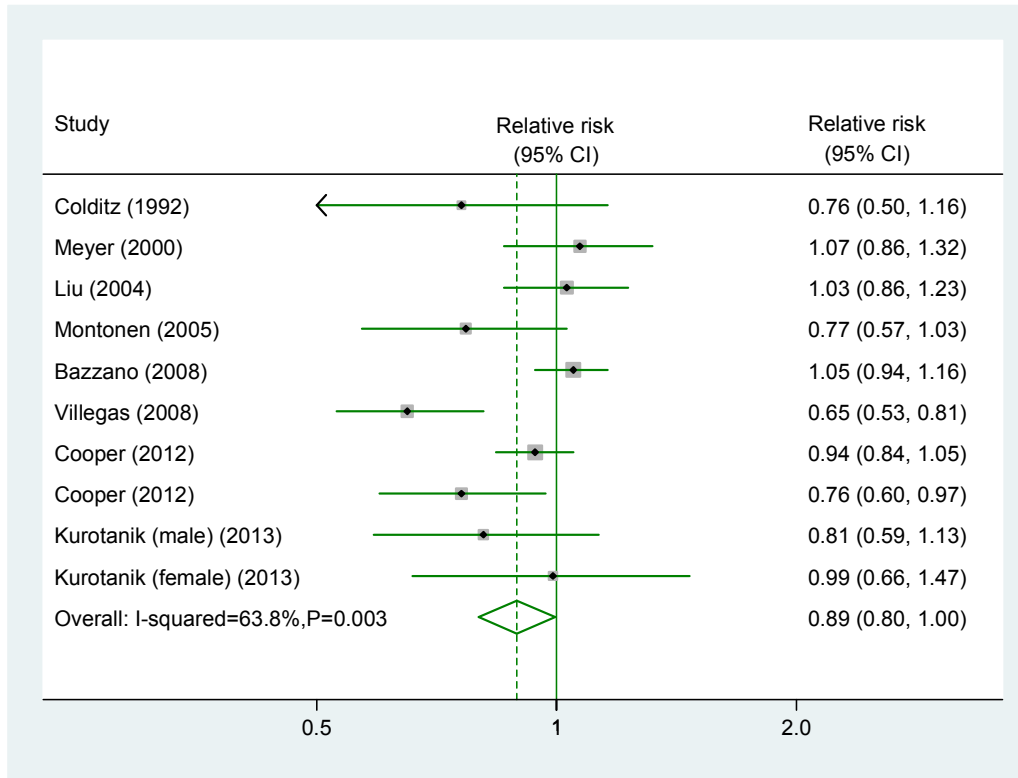

**Fig 4** Random effects analysis of fully adjusted studies for the association between vegetables intake and risk of type 2 diabetes

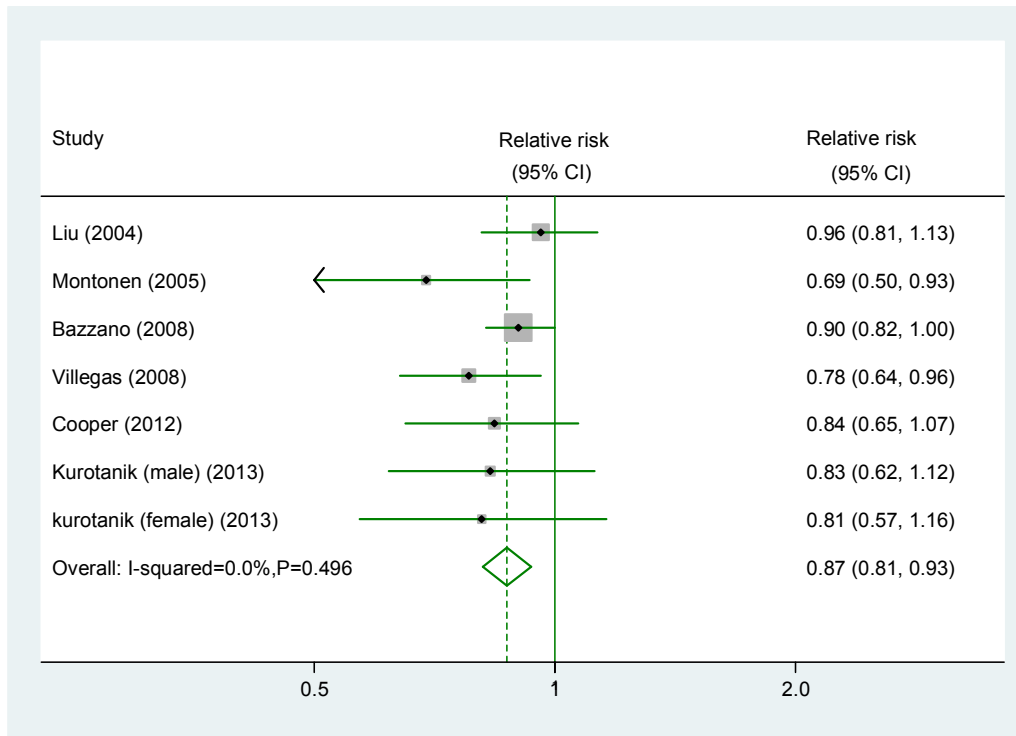

28 **Fig 5** Random effects analysis of fully adjusted studies for the association between  
29 green leafy vegetables intake and risk of type 2 diabetes  
30  
31  
32  
33  
34  
35  
36  
37  
38  
39  
40  
41  
42  
43  
44  
45  
46  
47  
48  
49  
50  
51  
52  
53  
54  
55  
56  
57  
58  
59  
60



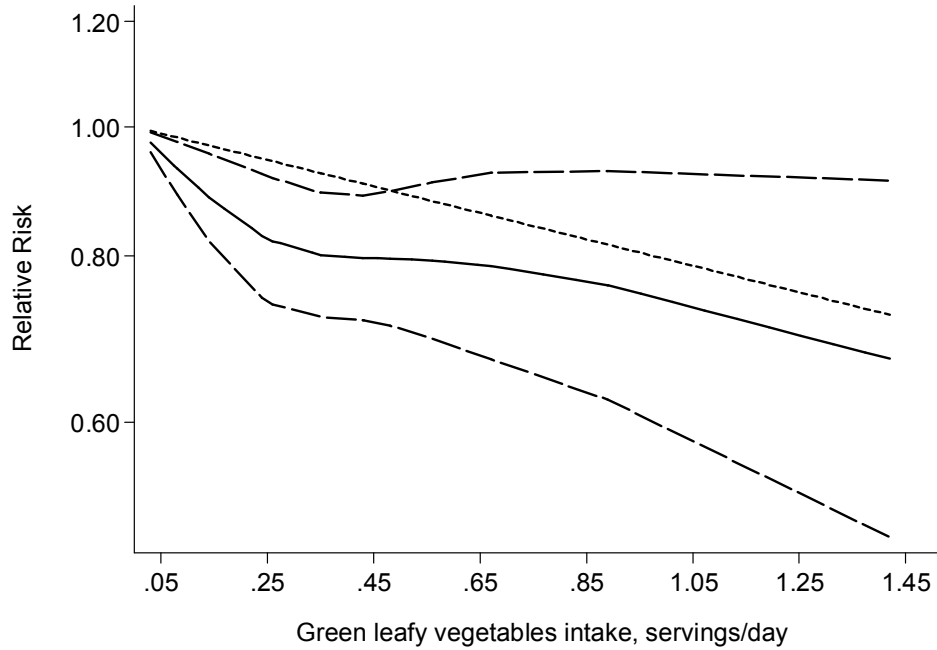

**Fig 6** Dose-response analyses of green leafy vegetables intake and risk of type 2 diabetes

review only

Table A. Characteristics of included studies of fruit and vegetables intake in relation to incident type 2 diabetes

| First author                         | Country/<br>cohort            | Age<br>(years)<br>/Sex | No of<br>total/follow<br>-up(years) | No of cases<br>/non-cases | Assessment<br>of type 2<br>diabetes                               | Measure of intake                                                                                           | Highest/lowest<br>intakes as<br>servings/day                               | Adjustments                                                                                               | Quality<br>score |
|--------------------------------------|-------------------------------|------------------------|-------------------------------------|---------------------------|-------------------------------------------------------------------|-------------------------------------------------------------------------------------------------------------|----------------------------------------------------------------------------|-----------------------------------------------------------------------------------------------------------|------------------|
| Colditz et al<br>1992, <sup>43</sup> | USA/Nurses Health Study       | 30-55/F                | 84360/6                             | 702/83658                 | Based on self reported                                            | 61 item FFQ. Calculated servings/day for fruit, vegetables. Data divided into fifths                        | Fruit: $\geq 3 / < 0.6$ . Vegetables: $\geq 2.9 / < 1.2$                   | Age, BMI, alcohol, family history of diabetes, prior weight change, time period                           | 2                |
| Meyer et al<br>2000, <sup>44</sup>   | USA/Iowa Women's Health Study | 55-69/F                | 35988/6                             | 1141/3484<br>7            | Based on self reported                                            | 127 item FFQ. Calculated servings/day for fruit, vegetables, and combined. Data divided into fifths         | Fruit: 3.36/0.57. Vegetables: 5.93/1.57. Fruit and vegetables: 8.86/2.57   | Age, BMI, total energy intake, WHR, education, smoking, alcohol intake, physical activity                 | 2                |
| Ford et al<br>2001, <sup>15</sup>    | USA/NHANES I                  | 25-74/M and F          | 9665/20                             | 1018/8647                 | Confirmed by self report or hospital records or death certificate | 24 hour recall. Calculated servings/week for fruit and vegetables combined. Data divided into thirds        | Fruit and vegetables: $\geq 5 / 0$                                         | Age, BMI, smoking, SBP, cholesterol, antihypertensive medication, exercise, alcohol, education, ethnicity | 1                |
| Liu et al<br>2004, <sup>45</sup>     | USA/Women's Health Study      | $\geq 45 / F$          | 38018/8.8                           | 1614/3640<br>4            | Based on self reported                                            | 131 item FFQ. Calculated servings/day for fruit, vegetables and combined. Defined green leafy vegetables as | Fruit: 3.91/0.62. Vegetables: 6.84/1.47. Fruit and vegetables: 10.16/2.54. | Age, BMI, smoking, total calories, alcohol, exercise, history of hypertension/high cholesterol, family    | 3                |

|    |                                    |                                                         |               |           |            |                                                                          |                                                                                                                                                              |                                                                                      |                                                                                                                                                              |   |
|----|------------------------------------|---------------------------------------------------------|---------------|-----------|------------|--------------------------------------------------------------------------|--------------------------------------------------------------------------------------------------------------------------------------------------------------|--------------------------------------------------------------------------------------|--------------------------------------------------------------------------------------------------------------------------------------------------------------|---|
|    |                                    |                                                         |               |           |            |                                                                          | spinach/kale/lettuce. Data divided into fifths                                                                                                               | Green leafy vegetables: 1.42/0.14                                                    | history of diabetes                                                                                                                                          |   |
| 10 | Montonen et al 2005, <sup>46</sup> | Finland/Finland Mobile Clinic Health Examination Survey | 40-69/M and F | 4304/23   | 383/3921   | Confirmed via social insurance register                                  | Dietary history interview. Calculated g/day for fruit and vegetables separately. Data divided into fifths                                                    | Fruit: > 1.47/ < 0.31. Vegetables: > 1.23/ < 0.4. Green leafy vegetables: > 0.4/<0.1 | Age, BMI, sex, smoking, energy intake, family history of diabetes, geographic area                                                                           | 3 |
| 19 | Bazzano et al 2008, <sup>48</sup>  | USA/Nurses' Health Study                                | 30-55/F       | 71346/18  | 4529/66817 | Confirmed if met WHO criteria (before 1997) or ADA criteria (after 1998) | 61 item FFQ. Calculated servings/day for fruit, vegetables and combined. Defined green leafy vegetables as spinach/kale/lettuce. Data divided into fifths    | Fruit: 2.5/0.5. Vegetables: 5.2/1.5. Fruit and Vegetables: 7.5/2.1                   | Age, BMI, physical activity, smoking, alcohol, hormone therapy, family history of diabetes, total energy intake                                              | 4 |
| 28 | Villegas et al 2008, <sup>47</sup> | China/Shanghai Women's Health Study                     | 40-70/F       | 64191/4.6 | 896/63295  | Confirmed by ADA criteria                                                | 77 item FFQ. Calculated g/day for fruit and vegetables separately. Defined green leafy vegetables as greens/Chinese greens/spinach. Data divided into fifths | Fruit: 4.56/0.82. Vegetables: 4.04/1.15. Green leafy vegetables: 1.28/0.26           | Age, BMI, WHR, education, smoking, alcohol, hypertension, disease history, hormone use, occupational history, physical activity, income, daily energy intake | 4 |

1  
2  
3  
4  
5  
6  
7  
8  
9  
10  
11  
12  
13  
14  
15  
16  
17  
18  
19  
20  
21  
22  
23  
24  
25  
26  
27  
28  
29  
30  
31  
32  
33  
34  
35  
36  
37  
38  
39  
40  
41  
42  
43  
44  
45  
46  
47  
48  
49

For peer review only

Country specific dietary questionnaires. Calculated g/day for fruit, vegetables and combined. Defined green leafy vegetables as chard/endive/lettuce/borage/watercress/beet/leaves/spinach. Data divided into quarters

Fruit: 5.39/0.75. Vegetables: 3.94/0.88. Fruit and Vegetables: 8.71/2.13. Green leafy vegetables: 5.93/0.05

Age, BMI, sex, education, centre, physical activity, smoking, total energy intake, alcohol

Fruit: 3.4/0.6. Vegetables: 2.6/1.1. Fruit and Vegetables: 5.7/2.1

Age, BMI, sex, waist circumference, education, TDI, occupational social class, smoking, physical activity, family history of diabetes, energy intake, season

Fruit:  $\geq 3 / < 0.57$

Age, BMI, ethnicity, smoking, multivitamin use, physical activity, family history of diabetes, hormone use, oral contraceptive use, total energy intake

Age, BMI, ethnicity,

|                                  |                                     |               |          |           |    |                                                                  |
|----------------------------------|-------------------------------------|---------------|----------|-----------|----|------------------------------------------------------------------|
| Cooper et al 2012, <sup>5</sup>  | 8countries/<br>EPIC-Inter Act study | 40-79/M and F | 24939/11 | 10821/141 | 18 | Based on self reported                                           |
| Cooper et al 2012, <sup>10</sup> | England/E PIC-Norfolk               | 40-79/M and F | 3704/11  | 653/3051  |    | Based on self reported                                           |
| Muraki et al 2013, <sup>11</sup> | USA/Nurses' Health Study            | 30-55/F       | 69554/14 | 2699/6685 | 5  | Confirmed by self report or medical records or death certificate |
| Muraki et al                     | USA/Nurse                           | 24-44/F       | 91246/8  | 741/90505 |    | Confirmed                                                        |

|                                    |                                          |               |          |           |   |                                         |                                                                                                                                                                                                                                 |                                                                                                                                                                                                |                                                                                                                                                                                |   |
|------------------------------------|------------------------------------------|---------------|----------|-----------|---|-----------------------------------------|---------------------------------------------------------------------------------------------------------------------------------------------------------------------------------------------------------------------------------|------------------------------------------------------------------------------------------------------------------------------------------------------------------------------------------------|--------------------------------------------------------------------------------------------------------------------------------------------------------------------------------|---|
| 2013, <sup>11</sup>                | s' Health Study II                       |               |          |           |   | by ADA criteria (after 1998)            | servings/week for fruit. Data divided into fifths                                                                                                                                                                               |                                                                                                                                                                                                | smoking, multivitamin use, physical activity, family history of diabetes, hormone use, oral contraceptive use, total energy intake                                             |   |
| Muraki et al 2013, <sup>11</sup>   | USA/Health Professionals Follow-up Study | 40-75/M       | 42504/12 | 1321/4118 | 3 | Confirmed by WHO criteria (before 1997) | 131 item FFQ. Calculated servings/month or servings/week for fruit. Data divided into fifths                                                                                                                                    | Fruit: $\geq 3 / < 0.57$                                                                                                                                                                       | Age, BMI, ethnicity, smoking, multivitamin use, physical activity, family history of diabetes, hormone use, oral contraceptive use, total energy intake                        | 4 |
| Kurotanik et al 2013, <sup>7</sup> | Japan/JPHC Study                         | 40-69/M and F | 48437/5  | 896/47541 |   | Based on self reported                  | 147 item FFQ. Calculated g/day for fruit, vegetables and combined. Defined green leafy vegetables as spinach/Chinese chives/garland chrysanthemums/cbingensa i/leaf mustard/mugwort/chard/komatsuna. Data divided into quarters | M Fruit: 3.42/0.34. Vegetables: 3.35/0.71. Fruit and Vegetables: 6.48/1.38. Green leafy vegetables: 0.45/0.04. F Fruit: 4.60/0.7. Vegetables: 3.84/0.94. Fruit and Vegetables: 8.1/1.98. Green | Age, BMI, public health centre area, smoking, alcohol, leisure-time activity, history of hypertension, coffee, family history of diabetes, Mg intake, Ca intake, energy intake | 3 |

1  
2  
3  
4  
5  
6  
7  
8  
9  
10  
11  
12  
13  
14  
15  
16  
17  
18  
19  
20  
21  
22  
23  
24  
25  
26  
27  
28  
29  
30  
31  
32  
33  
34  
35  
36  
37  
38  
39  
40  
41  
42  
43  
44  
45  
46  
47  
48  
49

leafy vegetables:  
0.54/0.07

---

FFQ=food frequency questionnaire, BMI=body mass index, SBP=systolic blood pressure, TDI=townsend deprivation index, WHR=weight:height ratio, ADA=American Diabetes Association, WHO=World Health Organization, M=male, F=female.

For peer review only

**Table B. Meta-analysis of intake of fruit and vegetables and risk of type 2 diabetes (highest versus lowest category)**

| Variables              | No of comparisons | Cases/ total | Test of association         | Test of heterogeneity               | Analysis of publication bias        |
|------------------------|-------------------|--------------|-----------------------------|-------------------------------------|-------------------------------------|
|                        |                   |              | Pooled RR (95% CI), P value | Heterogeneity ( $I^2$ , %), P value | Begg's test, Egger's test (P value) |
| Fruit only             | 13                | 26396/578591 | 0.92 (0.87 to 0.97), 0.003  | 14.3, 0.300                         | 0.127, 0.266                        |
| Vegetables only        | 10                | 21635/375287 | 0.89 (0.80 to 1.00), 0.042  | 63.8, 0.003                         | 0.474, 0.122                        |
| Fruit and vegetables   | 9                 | 20672/232097 | 0.94 (0.86 to 1.03), 0.202  | 34.6, 0.141                         | 0.348, 0.609                        |
| Green leafy vegetables | 7                 | 19139/251235 | 0.87 (0.81 to 0.93), 0.000  | 0, 0.496                            | 0.133, 0.101                        |

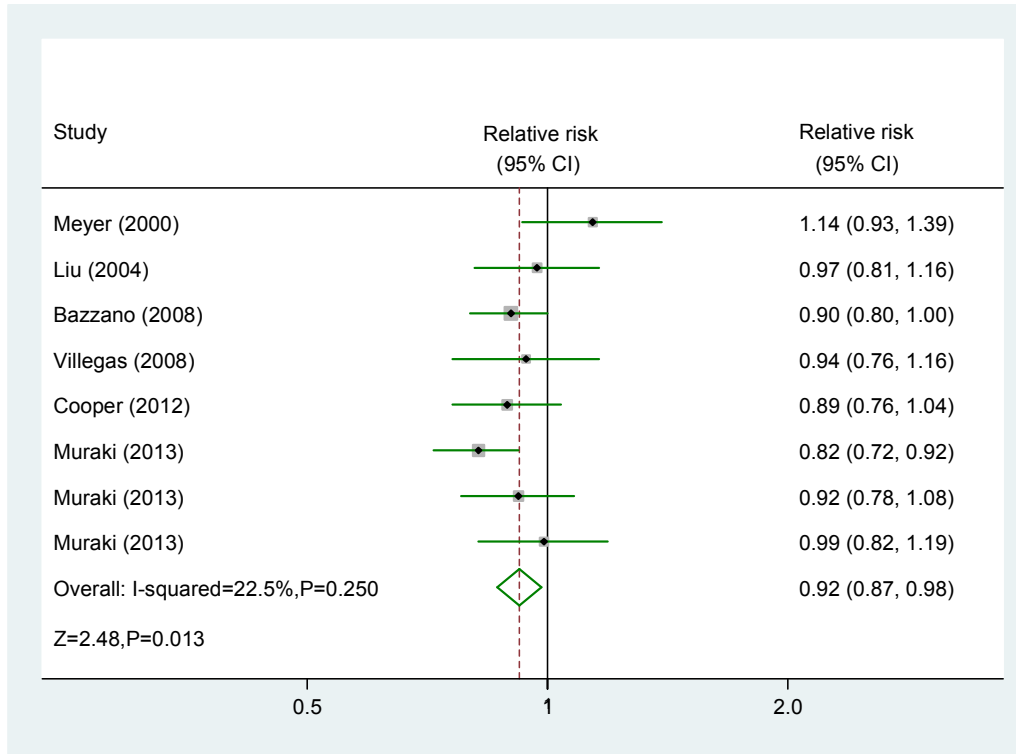

28 **Supplemental fig A** Random effects analysis of fully adjusted studies for the  
29 association between fruit intake and risk of type 2 diabetes  
30  
31  
32  
33  
34  
35  
36  
37  
38  
39  
40  
41  
42  
43  
44  
45  
46  
47  
48  
49  
50  
51  
52  
53  
54  
55  
56  
57  
58  
59  
60



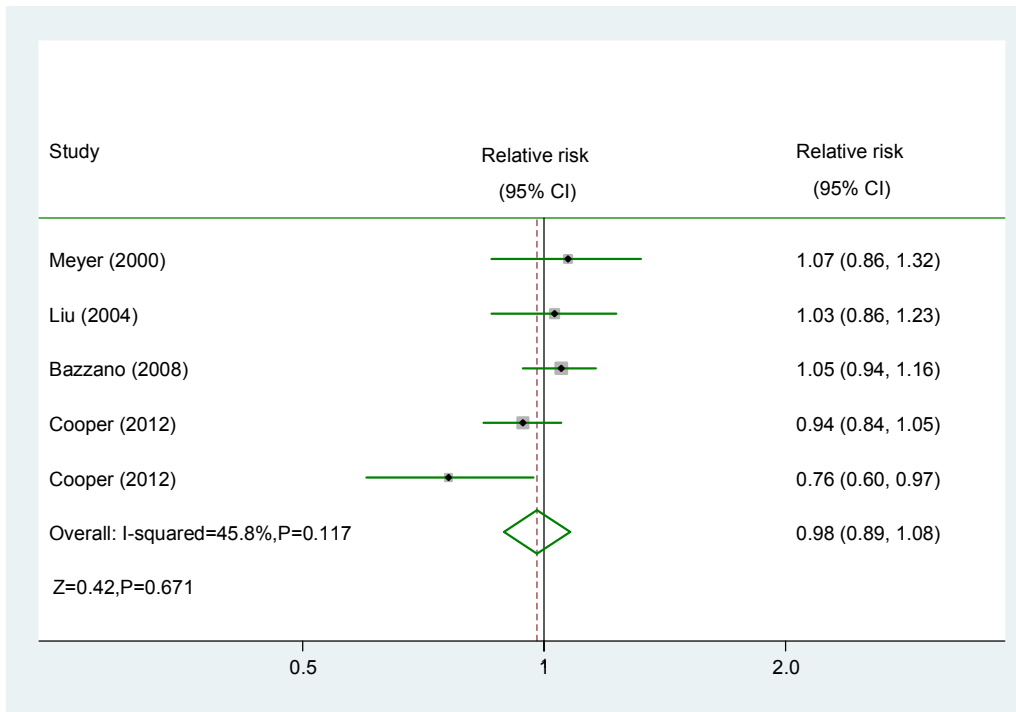

**Supplemental fig B** Random effects analysis of fully adjusted studies for the association between vegetables intake and risk of type 2 diabetes

Review only

1  
2  
3  
4  
5  
6  
7  
8  
9  
10  
11  
12  
13  
14  
15  
16  
17  
18  
19  
20  
21  
22  
23  
24  
25  
26  
27  
28  
29  
30  
31  
32  
33  
34  
35  
36  
37  
38  
39  
40  
41  
42  
43  
44  
45  
46  
47  
48  
49  
50  
51  
52  
53  
54  
55  
56  
57  
58  
59  
60

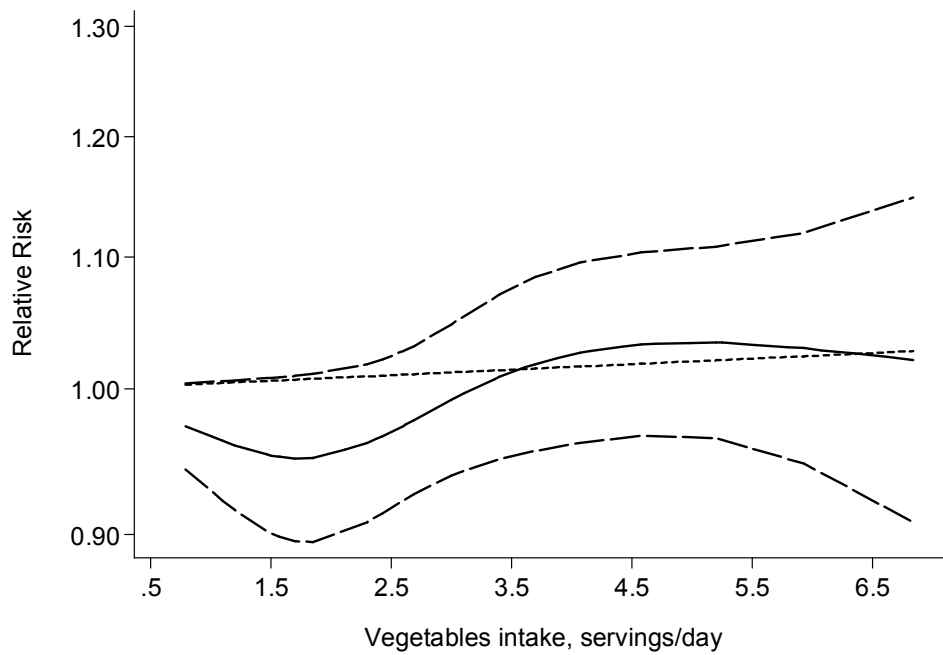

**Supplemental fig C** Dose-response analyses of vegetables intake and risk of type 2 diabetes

review only

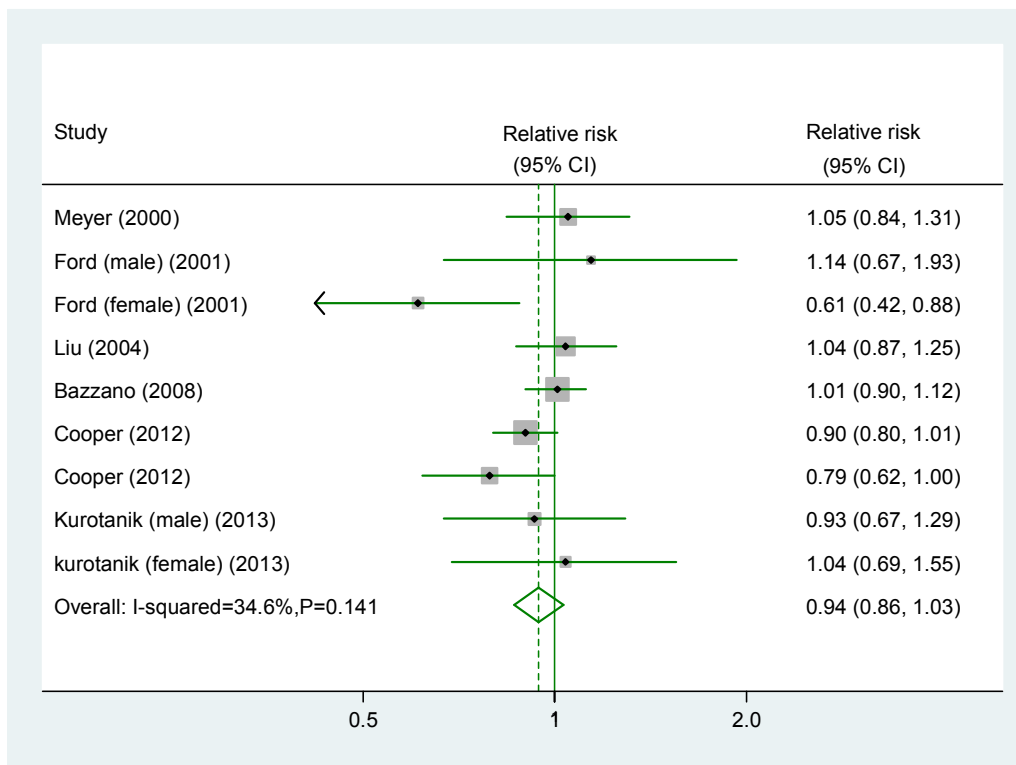

**Supplemental fig D** Random effects analysis of fully adjusted studies for the association between fruit and vegetables intake and risk of type 2 diabetes

Review only

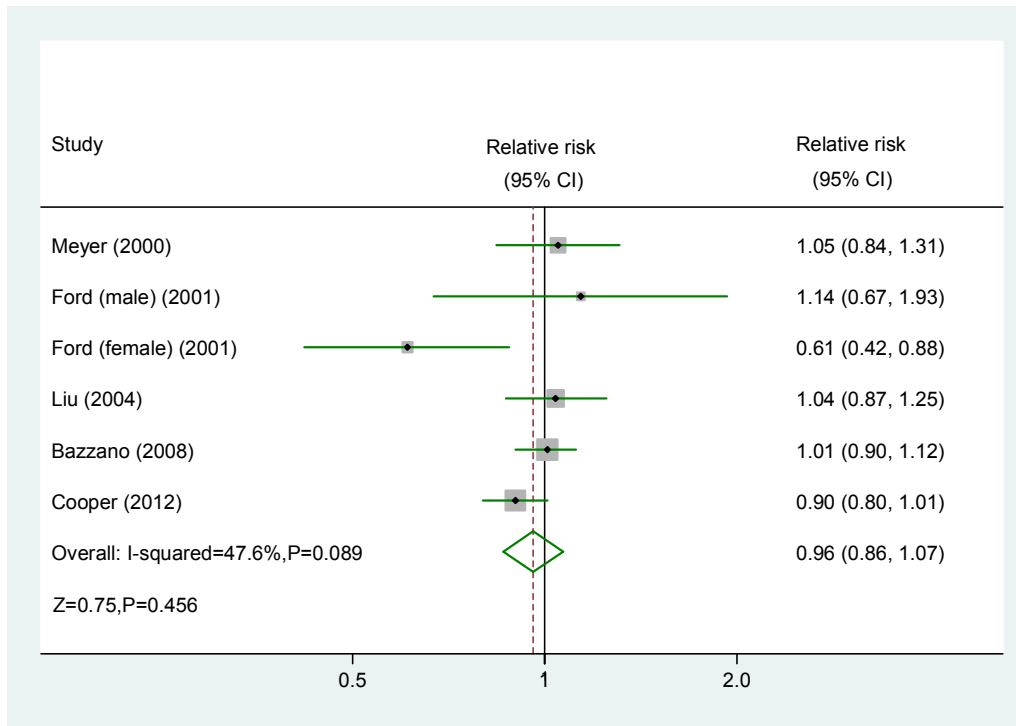

**Supplemental fig F** Random effects analysis of fully adjusted studies for the association between fruit and vegetables intake and risk of type 2 diabetes

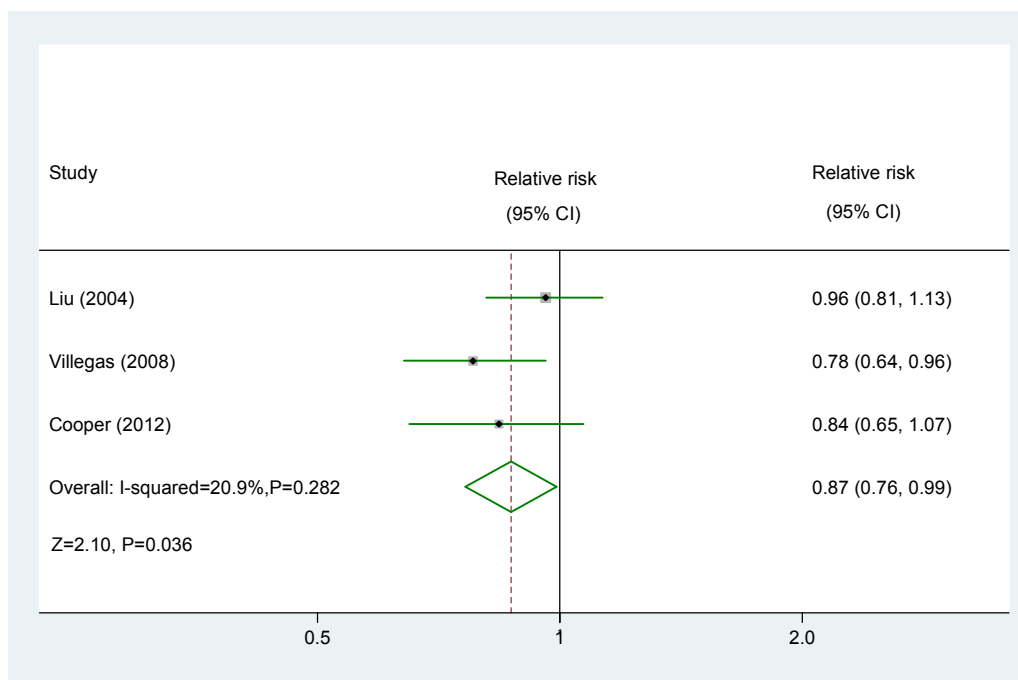

**Supplemental fig G** Random effects analysis of fully adjusted studies for the association between green leafy vegetables intake and risk of type 2 diabetes

review only

1  
2  
3  
4  
5  
6  
7  
8  
9  
10  
11  
12  
13  
14  
15  
16  
17  
18  
19  
20  
21  
22  
23  
24  
25  
26  
27  
28  
29  
30  
31  
32  
33  
34  
35  
36  
37  
38  
39  
40  
41  
42  
43  
44  
45  
46  
47  
48  
49  
50  
51  
52  
53  
54  
55  
56  
57  
58  
59  
60

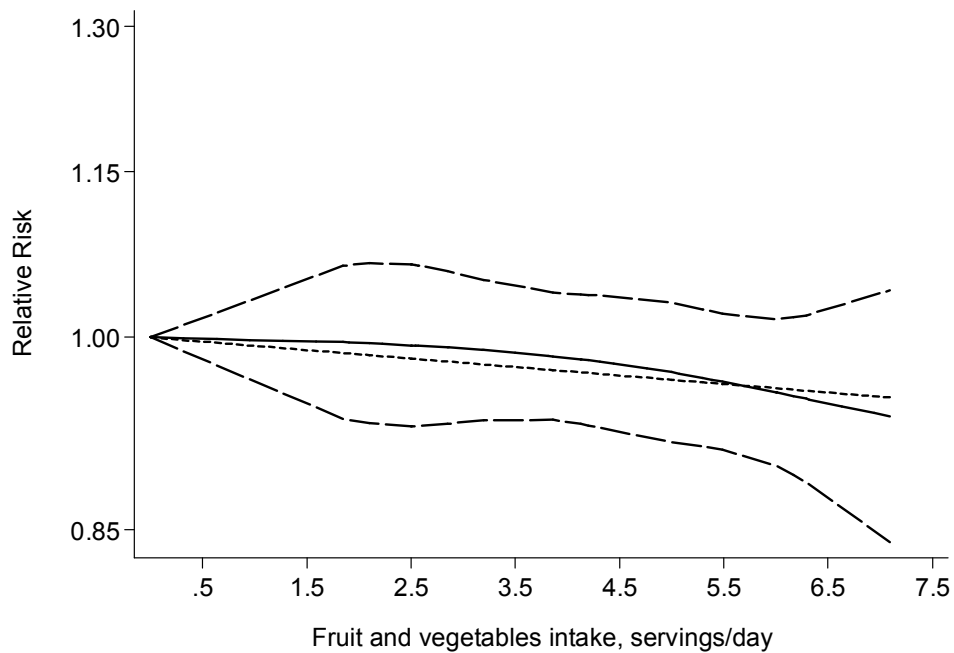

**Supplemental fig E** Dose-response analyses of fruit and vegetables intake and risk of type 2 diabetes

review only

1  
2  
3  
4 **Fruit and vegetable intake and risk of type 2 diabetes mellitus:**  
5  
6 **meta-analysis of prospective cohort studies**  
7  
8

9 **Min Li *master student*<sup>1</sup>, Yingli Fan *master student*<sup>2</sup>, Xiaowei Zhang *master***  
10 ***student*<sup>1</sup>, Wenshang Hou *master student*<sup>1</sup>, Zhenyu Tang *associate professor*<sup>1</sup>**  
11

12  
13  
14 <sup>1</sup>Department of Neurology, The Second Affiliated Hospital of Nanchang University, Nanchang  
15 330006, Jiangxi Province, People's Republic of China; <sup>2</sup>Department of Cardiovascular, The  
16 Second Affiliated Hospital of Nanchang University, Nanchang 330006, Jiangxi Province, People's  
17 Republic of China  
18  
19  
20

21 Correspondence to: Z Tang, Department of Neurology, The Second Affiliated Hospital of  
22 Nanchang University, No. 1, Minde Road, Nanchang, Jiangxi 330006, People's Republic of China  
23  
24  
25 zytang07016@sina.com  
26  
27  
28  
29  
30  
31  
32  
33  
34  
35  
36  
37  
38  
39  
40  
41  
42  
43  
44  
45  
46  
47  
48  
49  
50  
51  
52  
53  
54  
55  
56  
57  
58  
59  
60

## Abstract

**Objective** To clarify and quantify the potential dose-response association between the intake of fruit and vegetables and risk of type 2 diabetes.

**Design** Meta-analysis and systematic review of prospective cohort studies.

**Data source** Studies published before February 2014 identified through electronic searches using PubMed and Embase.

**Eligibility criteria for selecting studies** Prospective cohort studies with relative risks and 95% confidence intervals for type 2 diabetes according to the intake of fruit, vegetables, or fruit and vegetables.

**Results** A total of eleven articles including fifteen comparisons with 27 414 cases of type 2 diabetes and 588 256 participants were included in the meta-analysis. Evidence of curve linear associations were seen between fruit and green leafy vegetables consumption and risk of type 2 diabetes ( $P=0.013$  and  $P=0.036$  for non-linearity, respectively). The summary relative risk of type 2 diabetes for an increase of 1 serving fruit consumed per day was 0.92 (95% confidence interval 0.87 to 0.97) without heterogeneity among studies ( $P=0.3$ ,  $I^2=14.3\%$ ). For vegetables, the combined relative risk of type 2 diabetes for an increase of 1 serving consumed per day was 0.89 (95% confidence interval 0.80 to 1.00) with moderate heterogeneity among studies ( $P=0.003$ ,  $I^2=63.8\%$ ). For green leafy vegetables, the summary relative risk of type 2 diabetes for an increase of 0.2 serving consumed per day was 0.87 (95% confidence interval 0.81 to 0.93) without heterogeneity among studies ( $P=0.496$ ,  $I^2=0\%$ ). The combined estimates showed no significant benefits of increasing the consumption of fruit and vegetables combined.

**Conclusions** Higher fruit or vegetables, particularly green leafy vegetables intake is associated with a significantly reduced risk of type 2 diabetes.

## Article summary

Strengths and limitations of this study

To our knowledge, this is the largest systematic review and meta-analysis on the intake of fruit and vegetables and risk of type 2 diabetes. We also investigated a dose-response relation between fruit, vegetables, fruit and vegetables combined consumption and risk of type 2 diabetes.

The possibility of residual confounding or confounding by unmeasured factors, which cannot be ruled out in any observational study, must be acknowledged. We cannot exclude the possibility of recall bias in the assessments of diet based on the food frequency questionnaires.

1. Health expenditure on type 2 diabetes is increasing worldwide.
2. Epidemiological studies suggest that the intake of fruit and vegetables is beneficial in delaying or preventing the development of type 2 diabetes, though results from cohort studies are controversial.
3. Higher fruit or vegetables, particularly green leafy vegetables intake is associated with a significantly reduced risk of type 2 diabetes.
4. Dose-response analyses indicated a 8% lower risk of type 2 diabetes per 1 serving/day increment of fruit intake and 13% lower risk of type 2 diabetes per 0.2 serving/day increment of green leafy vegetables intake.
5. Further evidence from preferably randomized controlled studies should explore what kind of fruit or GLV can reduce the risk of type 2 diabetes.



## Introduction

Type 2 diabetes (T2D) is one of the most common noncommunicable diseases which is expected to affect in excess of 439 million adults worldwide by 2030,<sup>1</sup> with serious consequences for health care expenditure.<sup>2</sup> It has been estimated that the global health expenditure on diabetes is at least \$ 376 billion in 2010 and will be \$ 490 billion in 2030,<sup>3</sup> this creates a major public health burden. The prevention of T2D is thus clearly an important public health priority. In recent decades, concern has mounted regarding the premature mortality and morbidity associated with T2D, with growing interest in altering risk factors and reversing this global epidemic. Among the known risk factors for T2D, dietary factors have aroused particular attention. Lifestyle intervention trials that include dietary modification have been shown to be effective in delaying or preventing the development of T2D.<sup>4</sup> Although the effect of individual components or interactions between nutrients is still largely unknown, fruit and vegetables intake may explain some of this beneficial effect.<sup>5</sup>

To minimize the risk of dietary factors and reduce the incidence of T2D, a World Health Organization recommended the public to consume more than 400 g or five portions of combined fruit and vegetables per day for the prevention of T2D.<sup>6</sup> Nevertheless, in the Japan Public Health Center-based Prospective (JPHC) Study,<sup>7</sup> after a mean follow-up over five years, participants with the intake of fruit and vegetables may not be appreciably associated with the risk of T2D. Vegetables, especially green leafy vegetables (GLV), have been suggested to explain an apparent beneficial effect on T2D. In addition, several meta-analyses of observational studies have found that an increase in daily intake of GLV could significantly reduce the risk of T2D.<sup>5,8,9</sup> These studies were restricted by language and heterogeneous with respect to sample size. Additionally, recent studies involving relationship between the intake of fruit and vegetables and risk of T2D have been published from then on.<sup>5,7,10,11</sup> Furthermore, whether any dose-response relation exists between the intake of fruit and vegetables and risk of T2D is unknown. Therefore, we systematically reviewed and meta-analysed available studies to quantify the associations between dietary intake of fruit and vegetables and incidence of T2D based on identified prospective cohort studies. We pooled risk estimates for the highest versus lowest category of intake to examine the overall association. We also conducted a dose-response analysis for the trend estimation.

## Methods

### Search strategy

We carried out a systematic search of PubMed (Medline) and Embase through February 2014 for prospective cohort studies examining the association between the intake of fruit and vegetables and risk of T2D. The following key words were used in our search strategies: (“fruits” OR “vegetables” OR “citrus”) AND (“Type 2 diabetes” OR “non-insulin-dependent diabetes mellitus” OR “Diabetes Mellitus, Type 2” OR “NIDDM” OR “prediabetes” OR “impaired glucose tolerance” OR “impaired fasting glucose” OR “glucose” OR “hyperglycaemia” OR “insulin”) AND (“Follow-up studies” OR “prospective studies” OR “cohort studies” OR “longitudinal studies”). We restricted the search to human studies. No language restrictions were imposed. In addition, we scrutinized possible eligible references from relevant original papers and review articles to identify potential publications. We followed standard criteria for the performing and reporting of the meta-analyses of observational studies.<sup>12</sup>

### Study selection

1  
2  
3 Citations selected from the initial search were subsequently screened for eligibility. Studies were  
4 included in this meta-analysis if they satisfied the following criteria: (1) original studies (eg, not  
5 review articles, meeting abstracts, editorials, or commentaries); (2) prospective design (eg, not  
6 cross sectional design, case-control design); (3) the exposure of interest was the intake of fruits,  
7 vegetables, or fruit and vegetables combined; (4) the outcome was T2D; and (5) reported  
8 multivariate-adjusted risk estimates for the association between the fruit, vegetables, or fruit and  
9 vegetables combined, assessed as dietary intake, and T2D. Additionally, we excluded animal  
10 studies and letters without sufficient data. If data were reported more than once, we included the  
11 study with the longest follow-up time.

#### 12 **Validity assessment**

13  
14 Two authors (ML and YF) independently assessed all studies for quality using a modified scoring  
15 system, which allowed a total score from 0 to 6 points (6 reflecting the highest quality) on the  
16 basis of MOOSE,<sup>12</sup> QUATSO,<sup>13</sup> and STROBE.<sup>14</sup> The system was created to account for study  
17 eligibility (1 point for appropriate inclusion and exclusion criteria), outcome (1 point if diagnosis  
18 of T2D was based on accepted clinical criteria, and not solely based on self-report), exposure (1  
19 point if fruit and vegetables consumption were assessed with a validated tool, and 1 point if fruit  
20 and vegetables consumption were appropriately categorized), statistical analysis (1 point was  
21 given if adjustment included a few variables such as age, sex, body mass index, and family history  
22 of T2D, these being proven risk factors for T2D). Another point was given for any other factors  
23 were adjusted (such as alcohol, education, and physical activity).

#### 24 **Data extraction**

25  
26 Data were carried out independently by two other authors (XZ and WH) using a standard  
27 electronic sheets and cross-check to reach a consensus. For each study, the following information  
28 was abstracted: name of the first author, publication year, study population, geographical location,  
29 sex, age range, sample size (number of T2D cases, number of non-T2D cases, and number of  
30 participants), duration of follow-up, methods used to assess fruit and vegetables intake and  
31 ascertain T2D cases, highest and lowest of fruit and vegetables intake, and covariates adjusted for  
32 in the multivariable model. Study quality was evaluated by using the modified scoring system. All  
33 data were extracted from the published papers. If necessary, the primary authors were contacted to  
34 retrieve further information. For two studies that expressed data separately for men and women,<sup>7,15</sup>  
35 one study that included data from multiple cohorts,<sup>11</sup> we considered the analysis for each sex or  
36 cohort as an independent comparison and extracted data separately.

#### 37 **Statistical analysis**

38  
39 Within each study, we used multivariate-adjusted outcome data (expressed as relative risks and  
40 95% confidence intervals) for risk estimates. For the present analyses we assumed hazard ratios to  
41 be a valid approximation of relative risks, we converted these values in every study by taking their  
42 natural logarithms and calculating standard errors and corresponding 95% confidence intervals.  
43 Relative risks and their standard errors were pooled with the DerSimonian and Laird random  
44 effects model, which takes into account both within-study and between-study variabilities.<sup>16</sup> When  
45 some studies included in our meta-analysis used different measurement units (eg, grams per day or  
46 portions per day or servings per day),<sup>5,10,15</sup> we standardized fruit and vegetables intake into  
47 servings per day using a standard portion size of 106 g.<sup>17</sup> As different studies might use different  
48 exposure categories (thirds, quarters, or fifths),<sup>7,11,15</sup> we used the study specific relative risk for the  
49 highest versus lowest category of fruit, vegetables, or fruit and vegetables intake for the  
50  
51  
52  
53  
54  
55  
56  
57  
58  
59  
60

1  
2  
3 meta-analysis. We carried out a dose-response analysis for the trend estimation using the method  
4 that described by Greenland and Longnecker<sup>18</sup> and Orsini et al.<sup>19,20</sup> This analysis used data from  
5 the relative risks and 95% confidence intervals, distributions of cases and person years for  
6 exposure categories, and median/mean of fruit, vegetables, or fruit and vegetables intake levels for  
7 each comparison group. We assigned the midpoint of the upper and lower boundaries of each  
8 comparison group to determine mean fruit, vegetables, or fruit and vegetables intake levels if the  
9 median or mean intake was not provided. When the highest category was open ended, we assumed  
10 that the average of the category was set at 1.5 times the lower boundary. Additionally, we first  
11 created restricted cubic splines with 4 knots at percentiles 5%, 35%, 65%, and 95% of the  
12 distribution.<sup>21</sup> A P value for nonlinearity was calculated by testing the null hypothesis that the  
13 coefficient of the second spline is equal to zero. Heterogeneity among studies was evaluated using  
14 the chi-square test based on Cochran's Q test and  $I^2$  statistic at  $P < 0.10$  level of significance,<sup>16</sup> and  
15 quantification of heterogeneity was made by the  $I^2$  metric, which describes the percentage of total  
16 variation in point estimates that is due to heterogeneity rather than chance.<sup>22</sup> We considered low,  
17 moderate, and high degrees of heterogeneity to be  $I^2$  values of 25%, 50%, and 75%, respectively.  
18 To explore possible explanations for heterogeneity and to test the robustness of the association, we  
19 conducted subgroup analyses based on the location (Asia v Non-Asia), the quality of the study  
20 (high quality ( $\geq 4$ ) v lower quality ( $< 4$ ), length of follow-up ( $\geq 10$  years v  $< 10$  years), sex (male  
21 and female included v female only v male only), fractions of intake (thirds, quarters, or fifths),  
22 number of participants ( $\geq 50000$  v  $< 50000$ ), and number of cases ( $\geq 1000$  v  $< 1000$ ). We also  
23 performed the Begg rank correlation test and Egger's regression test to visualize a possible  
24 asymmetry.<sup>23-25</sup> All the statistical analyses were performed in Stata 12 (Stata Corp, College Station,  
25 TX). A threshold of  $P < 0.1$  was used to decide whether heterogeneity or publication bias was  
26 present.<sup>24</sup> In other ways, P values were 2-sided and  $P < 0.05$  was considered statistically  
27 significant.

## 36 Results

### 37 Literature search

38 Fig 1 shows the results of literature research and selection. We identified 308 articles from  
39 PubMed and 365 articles from Embase. After exclusion of duplicate records and studies that did  
40 not fulfill our inclusion criteria, 28 articles remained, and we further evaluated the full texts of  
41 these 28 publications. Of these, we excluded 17 studies as follows. Five articles were excluded  
42 owing to lack of sufficient data for estimation of relative risks.<sup>26-30</sup> Five articles were excluded  
43 because no original data could be extracted (review, type 1 diabetes, or cross sectional  
44 studies).<sup>31-35</sup> Another four articles were excluded because we deemed irrelevant.<sup>36-39</sup> We also  
45 excluded three articles because they did not give enough details on fruits, vegetables, or fruit and  
46 vegetables intake to warrant inclusion within the meta-analysis.<sup>40-42</sup> Finally, eleven articles met the  
47 inclusion criteria and were included in the meta-analysis.<sup>5,7,10,11,15,43-48</sup> Among these eleven articles,  
48 Ford et al and Kurotani et al study examined male and female separately<sup>7,11</sup> and Muraki et al  
49 report included data from three independent cohorts.<sup>15</sup> Thus, our meta-analysis included fifteen  
50 comparisons.

### 54 Study characteristics

55 Supplemental tables A and B in appendix 1 show the characteristics and main outcomes extracted  
56 from the included studies, all eleven articles were prospective cohort designs and participants who  
57  
58  
59  
60

1  
2  
3 were free of self reported diabetes at baseline.<sup>5,7,10,11,15,43-48</sup> In aggregate, the included studies  
4 consisted of 588 256 participants. Among the participants, we documented 27 414 cases of T2D  
5 occurred during follow-up periods ranging from 4.6 to 23 years (median of 11 years). Among 11  
6 articles, six cohorts were conducted primarily in the United States,<sup>11,15,43-45,48</sup> two articles were  
7 done in Asian countries (China and Japan)<sup>7,47</sup> and three cohorts were from European  
8 countries.<sup>5,10,46</sup> The number of participants ranged from 3704 in the EPIC-Norfolk study by  
9 Cooper et al<sup>10</sup> to 84 360 in the Nurses Health Study by Colditz et al.<sup>43</sup> Five studies included both  
10 male and female,<sup>5,7,10,15,46</sup> five studies included only female.<sup>43-45,47,48</sup> One article by Muraki et al  
11 reported three independent cohorts, two cohorts included only female, and one cohort only male.<sup>11</sup>  
12 The age of participants ranged from 24 to 79 years. Six papers provided information on fruit and  
13 vegetables intake separately and combined.<sup>5,7,10,44,45,48</sup> Three papers provided information on fruit  
14 and vegetables intake separately,<sup>43,46,47</sup> one paper provided only the combined data,<sup>15</sup> and another  
15 paper provided separate data on fruit.<sup>11</sup> Five papers also included separate data on the intake of  
16 GLV.<sup>5,7,45-47</sup> In most papers intake of fruit and vegetables was divided into fifths.<sup>11,43-48</sup> All studies  
17 provided adjusted risk estimates, results of study quality assessment (score 0-6) showed that most  
18 studies yielded a score of 3 or below (low quality).

### 19 **Fruit intake and risk of T2D**

20 13 comparisons from ten studies reported an association between fruit intake and risk of T2D,  
21 with 26 396 T2D outcomes and 578 591 participants. Overall, fruit intake was inversely associated  
22 with risk (relative risk 0.92, 95% confidence interval 0.87 to 0.97) (fig 2). We saw no  
23 heterogeneity among studies ( $P=0.3$ ,  $I^2=14.3\%$ ). Additionally, no evidence of substantial  
24 publication bias was observed from the Begg ( $P=0.127$ ) and Egger regression tests ( $P=0.266$ ) (see  
25 supplemental table B in appendix 1). Among 13 comparisons, eight comparisons were eligible for  
26 the dose-response analysis of fruit intake and risk of T2D. Using a restricted cubic splines model,  
27 we found a significant curvilinear association ( $P=0.013$  for non-linearity, fig 3). Dose-response  
28 analysis indicated that a 1 serving/day increment of fruit intake was associated with 8% lower risk  
29 of T2D (relative risk 0.92, 95% confidence interval 0.87 to 0.98,  $I^2=22.5\%$ ) (see supplemental fig  
30 A in appendix 2).

### 31 **Vegetables intake and risk of T2D**

32 Nine studies reported an association between vegetables intake and risk of T2D, with 21 635 T2D  
33 outcomes and 37 5287 participants. Using a random effects model summarizing all 10  
34 comparisons, we found significant association between vegetables intake and risk (relative risk  
35 0.89, 95% confidence interval 0.80 to 1.00) (fig 4). There was moderate study heterogeneity  
36 ( $P=0.003$ ,  $I^2=63.8\%$ ). However, no evidence of substantial publication bias was observed from the  
37 Begg ( $P=0.474$ ) and Egger regression tests ( $P=0.122$ ) (see supplemental table B in appendix 1).  
38 Among 10 comparisons, five comparisons were eligible for the trend estimation. Dose-response  
39 analysis found no association with risk of T2D per 1 serving/day increment of vegetables intake  
40 (relative risk 0.98, 95% confidence interval 0.89 to 1.08,  $I^2=45.8\%$ ) (see supplemental fig B in  
41 appendix 2). No publication bias was observed ( $P=0.117$ ). We found no evidence of a curve linear  
42 association between vegetables intake and risk ( $P=0.671$  for non-linearity, see supplemental fig C  
43 in appendix 2).

### 44 **Fruit and vegetables intake and risk of T2D**

45 Information on fruit and vegetables intake and T2D were available in 9 comparisons from seven  
46 prospective studies, totalling 20 672 T2D outcomes and 232 097 participants. Overall, fruit and  
47  
48  
49  
50  
51  
52  
53  
54

1  
2  
3  
4  
5  
6  
7  
8  
9  
10  
11  
12  
13  
14  
15  
16  
17  
18  
19  
20  
21  
22  
23  
24  
25  
26  
27  
28  
29  
30  
31  
32  
33  
34  
35  
36  
37  
38  
39  
40  
41  
42  
43  
44  
45  
46  
47  
48  
49  
50  
51  
52  
53  
54  
55  
56  
57  
58  
59  
60

vegetables intake was not associated with risk (relative risk 0.94, 95% confidence interval 0.86 to 1.03) (see supplemental fig D in appendix 2). We saw no heterogeneity among studies ( $P=0.141$ ,  $I^2=34.6\%$ ). Additionally, no evidence of substantial publication bias was observed from the Begg ( $P=0.348$ ) and Egger regression tests ( $P=0.609$ ) (see supplemental table B in appendix 1). Among 9 comparisons, six comparisons were eligible for the dose-response analysis of fruit and vegetables intake and risk of T2D. We did not find a significant curvilinear association ( $P=0.456$  for non-linearity, see supplemental fig E in appendix 2). Dose-response analysis indicated that a 1 serving/day increment of fruit and vegetables intake (relative risk 0.96, 95% confidence interval 0.86 to 1.07,  $I^2=47.6\%$ ) (see supplemental fig F in appendix 2).

#### **GLV intake and risk of T2D**

7 comparisons from six studies reported an association between GLV intake and risk of T2D, with 19 139 T2D outcomes and 251 235 participants. Overall, GLV intake was inversely associated with risk (relative risk 0.87, 95% confidence interval 0.81 to 0.93) (fig 5). No significant heterogeneity was detected among studies ( $P=0.496$ ,  $I^2=0\%$ ). Additionally, we did not observe evidence of substantial publication bias (the Begg and Egger regression tests,  $P=0.133$  and  $P=0.101$ , respectively) (see supplemental table B in appendix 1). Among 7 comparisons, only three comparisons were eligible for the trend estimation. Using a restricted cubic splines model, we found a significant curvilinear association ( $P=0.036$  for non-linearity, fig 6). Dose-response analysis indicated that a 0.2 serving/day increment of GLV intake was associated with 13% lower risk of T2D (relative risk 0.87, 95% confidence interval 0.76 to 0.99,  $I^2=20.9\%$ ) (see supplemental fig G in appendix 2). No publication bias was observed ( $P=0.282$ ).

#### **Subgroup analyses**

To examine the stability of the primary results, we carried out subgroup analyses (table 1). The association between fruit, vegetables, or fruit and vegetables intake and risk of T2D were similar in subgroup analyses, which were separately defined study quality, length of follow-up, sex, location, number of cases or participants, and whether the different ways in which authors had grouped intake (thirds, quarters, or fifths) affected the results. The summary estimates of relative risks from each category were pooled (table 2). We paid close attention to the highest versus lowest category. Almost all subgroups that analysed intake of GLV showed a benefit of consuming greater quantities (fig 5). Table 3 also showed significant reductions in risk of T2D events for consumption of fruit, vegetables, or fruit and vegetables combined.

#### **Discussion**

In this meta-analysis dietary intake of fruit, vegetables, and GLV, but not fruit and vegetables combined, were associated with a lower risk of T2D. Dose-response analyses indicated a 8% lower risk of T2D per 1 serving/day increment of fruit intake and 13% lower risk of T2D per 0.2 serving/day increment of GLV intake, but no significant trend for vegetables or fruit and vegetables combined.

#### **Results in relation to other studies**

Over the past decades, extensive prospective studies have reported the association of fruit, vegetables, or fruit and vegetables combined with T2D risk.<sup>5,7,10,11,15,43-48</sup> However, the role of dietary factors in T2D is still controversial. Some of the studies failed to find the association between fruit intake or fruit and vegetables combined and risk of T2D.<sup>8,44</sup> However, Bazzano and colleagues analysed data from 11 different U.S. states with 18 years of follow-up and found that



1  
2  
3 consumption of fruit was associated with a lower hazard of diabetes, whereas no significant  
4 association for total fruit and vegetables consumption.<sup>48</sup> Similar to previous analysis in the Nurses'  
5 Health Study, the results from three prospective longitudinal cohort studies also supported an  
6 inverse association between fruit intake and risk of T2D.<sup>11</sup> But these studies have the potential for  
7 bias due to measurement error. In addition, two cohort studies have suggested an inverse  
8 association between total fruit and vegetables consumption and risk of T2D.<sup>10,15</sup>

9  
10 A few large cohort studies have found an inverse association between vegetables consumption,  
11 especially GLV and risk of T2D.<sup>10,45-47</sup> These findings all agreed with two meta-analyses.<sup>5,9</sup> But  
12 another systematic review based on five cohort studies suggested that there was no protective  
13 association between vegetables intake and T2D.<sup>8</sup>

14  
15 Several plausible biological mechanisms have been proposed to explain abovementioned  
16 association. Fruit and vegetables are rich in fibre,<sup>49</sup> which has been shown to improve insulin  
17 sensitivity and insulin secretion to overcome insulin resistance.<sup>50</sup> However, meta-analyses showed  
18 that fruit and vegetables fibre is inconsistently associated with the risk of T2D.<sup>51</sup> On the other  
19 hand, it may contribute to a decreased incidence of T2D through their low energy density and  
20 glycemic load, and high micronutrient content.<sup>52</sup> In particular, GLV are rich in bioactive  
21 phytochemicals (such as vitamin C and carotenoids), which are known for their antioxidant  
22 properties.<sup>53-55</sup> Antioxidants in fruit and vegetables have been hypothesized to improve insulin  
23 sensitivity and protect against diabetes in several supplementation trials.<sup>56,57</sup> In addition, it also  
24 might reduce the risk of T2D due to the supply of magnesium (Mg), a recent meta-analysis  
25 detected Mg intake to be inversely associated with the risk of T2D.<sup>58</sup> Taking this evidence into  
26 consideration, it appears that the beneficial effects of vegetables, particularly GLV consumption  
27 on the risk of T2D can be mainly explained by antioxidant vitamins and magnesium. Further  
28 investigation is warranted to understand the mechanisms involved in the proposed relation  
29 between fruit, vegetables, or GLV and risk of T2D.

### 30 31 32 **Exploration of heterogeneity**

33  
34 Heterogeneity between studies was found, which did not alter much in the subgroup analyses.  
35 There are differences in types of vegetable consumed between Asian (such as China) and  
36 Non-Asian populations. Therefore, within the subgroup analysis we examined location as a  
37 possible source of heterogeneity. As traditional Chinese diets are high in vegetables (such as GLV  
38 and cruciferous vegetables), unsurprisingly, vegetables (including GLV) intake were greater in  
39 China than the US or Europe. We also examined study quality, length of follow-up, sex, number of  
40 cases or participants, and whether the different ways in which authors had grouped intake (thirds,  
41 quarters, or fifths) as possible sources of heterogeneity, these did not show any significant  
42 heterogeneity between studies. Although the subgroup analysis could not explain the level of  
43 heterogeneity, in interpreting the results, several differences between the studies are worth  
44 discussing.

45  
46 Assessment methods of fruit, vegetables, or fruit and vegetables combined consumption differed  
47 between the studies. Most epidemiological studies used the food frequency questionnaires (FFQs)  
48 to assess quantity of fruit, vegetables, or fruit and vegetables combined intake.<sup>7,10,11,43-45,47,48</sup> It is  
49 less suitable for the assessment of absolute intake, which they tend to overestimate.<sup>59,60</sup> However,  
50 two studies collected data via a single 24 hour recall and dietary history interviews,  
51 respectively.<sup>15,46</sup> These measurements may underestimate true associations between fruit,  
52 vegetables, or fruit and vegetables combined consumption and risk of T2D. In addition,  
53  
54  
55  
56  
57  
58  
59  
60

1  
2  
3 calculations of daily consumption were differed (such as servings per week, servings per day, or  
4 grams per day). Although we standardized primary data using a standard portion size of 106g,  
5 conclusions should be interpreted with caution. Another possible explanation for the differences  
6 between the studies might be the classification of food groups. GLVs' criteria was inconsistent:  
7 three studies included spinach and lettuce; one included spinach and greens; others did not provide  
8 specific description. If they were included with an uniform definition of each groups, the  
9 associations might differ.

### 10 11 **Strengths and limitations**

12 Compared with the previous meta-analyses,<sup>5,8,9</sup> our study has several strengths. The present  
13 meta-analysis included 2.6-times more participants and 2.8-times more T2D cases, which  
14 significantly increased the statistical power to detect potential associations. To our knowledge, this  
15 is the largest systematic review and meta-analysis on the intake of fruit and vegetables and risk of  
16 T2D. In addition, to examine the shape of these possible associations, we investigated a  
17 dose-response relation between fruit, vegetables, fruit and vegetables combined consumption and  
18 risk of T2D. Therefore, the results should be more reliable.

19 In interpreting the results, several limitations of this meta-analysis should also be acknowledged.  
20 Firstly, although in the multivariable analysis we considered a multitude of lifestyle and dietary  
21 factors. The possibility of residual confounding or confounding by unmeasured factors, which  
22 cannot be ruled out in any observational study, must be acknowledged. Second, we cannot exclude  
23 the possibility of recall bias in the assessments of diet based on the FFQs. However, the  
24 prospective study design and exclusion of participants with chronic diseases at baseline should  
25 minimize such bias. Third, the noticeable limitation of our study was the potential for bias due to  
26 inevitable measurement error, especially for individual with lower consumption levels. We  
27 attempted to reduce measurement error in adjusting for energy intake and using of cumulatively  
28 averaged intake levels. Fourth, because we had no source of information other than questionnaire  
29 for the identification of T2D, we might have underestimated the incidence of T2D. In addition,  
30 subclinical diseases at baseline might have distorted our risk estimate to some extent. Finally, the  
31 possible limitation is due to language bias. We attempted to minimize this bias by searching major  
32 electronic databases with no language restriction. However, several articles published in  
33 non-English languages might not appear in international journal databases, and could be omitted  
34 by our searches.<sup>61</sup>

### 35 36 37 38 39 40 41 42 43 **Conclusions**

44 In summary, our meta-analysis suggests that higher fruit or vegetables, particularly GLV intake is  
45 associated with a significantly reduced risk of T2D. In addition, the dose-response relations also  
46 indicate that relatively high fruit or GLV may still decrease risk of T2D. Further evidence from  
47 preferably randomized controlled studies should explore what kind of fruit or GLV can reduce the  
48 risk of T2D.  
49  
50  
51  
52  
53  
54  
55  
56  
57  
58  
59  
60

Contributors: ML and ZT conceived and designed the study. ML and YF searched the databases and checked them according to the eligible criteria and exclusion criteria. ZT helped develop search strategies. XZ and WH extract quantitative data. YF, XZ, and WH analyzed the data. ML wrote the draft of the paper. All authors contributed to writing, reviewing, or revising the paper. ZT is the guarantor.

Funding: This work was not funded by any foundation or program.

Competing interests: All authors have completed the ICMJE uniform disclosure form at [www.icmje.org/coi\\_disclosure.pdf](http://www.icmje.org/coi_disclosure.pdf) (available on request from the corresponding author) and declare: no support from any organization for the submitted work; no financial relationships with any organizations that might have an interest in the submitted work in the previous three years; no other relationships or activities that could appear to have influenced the submitted work.

Ethical approval: Not required.

Data sharing: No additional data available.

- 1 Shaw JE, Sicree RA, Zimmet PZ. Global estimates of the prevalence of diabetes for 2010 and 2030. *Diabetes Res Clin Pract* 2010;87:4-14.
- 2 Jonsson B. Revealing the cost of Type II diabetes in Europe. *Diabetologia* 2002;45:S5-12.
- 3 Zhang P, Zhang X, Brown J, Vistisen D, Sicree R, Shaw J, et al. Global healthcare expenditure on diabetes for 2010 and 2030. *Diabetes Res Clin Pract* 2010;87:293-301.
- 4 Gillies CL, Abrams KR, Lambert PC, Cooper NJ, Sutton AJ, Hsu RT, et al. Pharmacological and lifestyle interventions to prevent or delay type 2 diabetes in people with impaired glucose tolerance: systematic review and meta-analysis. *BMJ* 2007;334:299.
- 5 Cooper AJ, Forouhi NG, Ye Z, Buijsse B, Arriola L, Balkau B, et al. Fruit and vegetable intake and type 2 diabetes: EPIC-InterAct prospective study and meta-analysis. *Eur J Clin Nutr* 2012;66:1082-92.
- 6 World Health Organization/UN Food and Agriculture Organization. *Diet, Nutrition and the Prevention of Chronic Diseases: Report of a Joint FAO/WHO Expert Consultation*. Geneva, World Health Org., 2003 (Tech. Rep. Ser., no. 916).
- 7 Kurotani K, Nanri A, Goto A, Mizoue T, Noda M, Kato M, et al. Vegetable and fruit intake and risk of type 2 diabetes: Japan Public Health Center-based Prospective Study. *Br J Nutr* 2013;109:709-17.
- 8 Hamer M, Chida Y. Intake of fruit, vegetables, and antioxidants and risk of type 2 diabetes: systematic review and meta-analysis. *J Hypertens* 2007;25:2361-9.
- 9 Carter P, Gray LJ, Troughton J, Khunti K, Davies MJ. Fruit and vegetable intake and incidence of type 2 diabetes mellitus: systematic review and meta-analysis. *BMJ* 2010;341:c4229.
- 10 Cooper AJ, Sharp SJ, Lentjes MA, Luben RN, Khaw KT, Wareham NJ, et al. A prospective study of the association between quantity and variety of fruit and vegetable intake and incident type 2 diabetes. *Diabetes Care* 2012;35:1293-300.
- 11 Muraki I, Imamura F, Manson JE, Hu FB, Willett WC, van Dam RM, et al. Fruit consumption and risk of type 2 diabetes: results from three prospective longitudinal cohort studies. *BMJ* 2013;347:f5001.
- 12 Stroup DF, Berlin JA, Morton SC, Olkin I, Williamson GD, Rennie D, et al. Meta-analysis of observational studies in epidemiology: a proposal for reporting. *Meta-analysis Of Observational*



- 1  
2  
3 Studies in Epidemiology (MOOSE) group. *JAMA* 2000;283:2008-12.
- 4 13 Wong WC, Cheung CS, Hart GJ. Development of a quality assessment tool for systematic  
5 reviews of observational studies (QATSO) of HIV prevalence in men having sex with men and  
6 associated risk behaviours. *Emerg Themes Epidemiol* 2008;5:23.
- 7  
8 14 von EE, Altman DG, Egger M, Pocock SJ, Gotsche PC, Vandembroucke JP. The Strengthening  
9 the Reporting of Observational Studies in Epidemiology (STROBE) statement: guidelines for  
10 reporting observational studies. *Prev Med* 2007;45:247-51.
- 11  
12 15 Ford ES, Mokdad AH. Fruit and vegetable consumption and diabetes mellitus incidence among  
13 U.S. adults. *Prev Med* 2001;32:33-9.
- 14  
15 16 DerSimonian R, Laird N. Meta-analysis in clinical trials. *Control Clin Trials* 1986;7:177-88.
- 16  
17 17 Dauchet L, Amouyel P, Hercberg S, Dallongeville J. Fruit and vegetable consumption and risk  
18 of coronary heart disease: a meta-analysis of cohort studies. *J Nutr* 2006;136:2588-93.
- 19  
20 18 Greenland S, Longnecker MP. Methods for trend estimation from summarized dose-response  
21 data, with applications to meta-analysis. *Am J Epidemiol* 1992;135:1301-9.
- 22  
23 19 Orsini N, Bellocco R, Greenland S. Generalized least squares for trend estimation of  
24 summarized dose-response data. *Stata Journal* 2006;6:40-57.
- 25  
26 20 Orsini N, Li R, Wolk A, Khudyakov P, Spiegelman D. Meta-analysis for linear and nonlinear  
27 dose-response relations: examples, an evaluation of approximations, and software. *Am J  
28 Epidemiol* 2012;175:66-73.
- 29  
30 21 Harrell FE Jr, Lee KL, Pollock BG. Regression models in clinical studies: determining  
31 relationships between predictors and response. *J Natl Cancer Inst* 1988;80:1198-202.
- 32  
33 22 Higgins JP, Thompson SG, Deeks JJ, Altman DG. Measuring inconsistency in meta-analyses.  
34 *BMJ* 2003;327:557-60.
- 35  
36 23 Begg CB, Mazumdar M. Operating characteristics of a rank correlation test for publication bias.  
37 *Biometrics* 1994;50:1088-101.
- 38  
39 24 Egger M, Davey SG, Schneider M, Minder C. Bias in meta-analysis detected by a simple,  
40 graphical test. *BMJ* 1997;315:629-34.
- 41  
42 25 Peters JL, Sutton AJ, Jones DR, Abrams KR, Rushton L. Contour-enhanced meta-analysis  
43 funnel plots help distinguish publication bias from other causes of asymmetry. *J Clin  
44 Epidemiol* 2008;61:991-6.
- 45  
46 26 Bauer F, Beulens JW, van der A DL, Wijnenga C, Grobbee DE, Spijkerman AM, et al. Dietary  
47 patterns and the risk of type 2 diabetes in overweight and obese individuals. *Eur J Nutr*  
48 2013;52:1127-34.
- 49  
50 27 Eshak ES, Iso H, Mizoue T, Inoue M, Noda M, Tsugane S. Soft drink, 100% fruit juice, and  
51 vegetable juice intakes and risk of diabetes mellitus. *Clin Nutr* 2013;32:300-8.
- 52  
53 28 von RA, Feller S, Bergmann MM, Boeing H. Diet and risk of chronic diseases: results from the  
54 first 8 years of follow-up in the EPIC-Potsdam study. *Eur J Clin Nutr* 2013;67:412-9.
- 55  
56 29 Yu R, Woo J, Chan R, Sham A, Ho S, Tso A, et al. Relationship between dietary intake and the  
57 development of type 2 diabetes in a Chinese population: the Hong Kong Dietary Survey.  
58 *Public Health Nutr* 2011;14:1133-41.
- 59  
60 30 Morimoto A, Ohno Y, Tatsumi Y, Mizuno S, Watanabe S. Effects of healthy dietary pattern and  
other lifestyle factors on incidence of diabetes in a rural Japanese population. *Asia Pac J Clin  
Nutr* 2012;21:601-8.
- 31 Martinez-Gonzalez MA, de la Fuente-Arillaga C, Lopez-Del-Burgo C, Vazquez-Ruiz Z,

- 1  
2  
3 Benito S, Ruiz-Canela M. Low consumption of fruit and vegetables and risk of chronic disease:  
4 a review of the epidemiological evidence and temporal trends among Spanish graduates.  
5 *Public Health Nutr* 2011;14:2309-15.  
6
- 7 32 Esposito K, Kastorini CM, Panagiotakos DB, Giugliano D. Prevention of type 2 diabetes by  
8 dietary patterns: a systematic review of prospective studies and meta-analysis. *Metab Syndr*  
9 *Relat Disord* 2010;8:471-6.  
10
- 11 33 Lodefalk M, Aman J. Food habits, energy and nutrient intake in adolescents with Type 1  
12 diabetes mellitus. *Diabet Med* 2006;23:1225-32.  
13
- 14 34 Zhu Y, Zhang Y, Ling W, Feng D, Wei X, Yang C, et al. Fruit consumption is associated with  
15 lower carotid intima-media thickness and C-reactive protein levels in patients with type 2  
16 diabetes mellitus. *J Am Diet Assoc* 2011;111:1536-42.  
17
- 18 35 Hosseinpour-Niazi S, Mirmiran P, Sohrab G, Hosseini-Esfahani F, Azizi F. Inverse association  
19 between fruit, legume, and cereal fiber and the risk of metabolic syndrome: Tehran Lipid and  
20 Glucose Study. *Diabetes Res Clin Pract* 2011;94:276-83.  
21
- 22 36 Odegaard AO, Koh WP, Arakawa K, Yu MC, Pereira MA. Soft drink and juice consumption  
23 and risk of physician-diagnosed incident type 2 diabetes: the Singapore Chinese Health Study.  
24 *Am J Epidemiol* 2010;171:701-8.  
25
- 26 37 Hodge AM, English DR, O'Dea K, Giles GG. Dietary patterns and diabetes incidence in the  
27 Melbourne Collaborative Cohort Study. *Am J Epidemiol* 2007;165:603-10.  
28
- 29 38 Cai H, Shu XO, Gao YT, Li H, Yang G, Zheng W. A prospective study of dietary patterns and  
30 mortality in Chinese women. *Epidemiology* 2007;18:393-401.  
31
- 32 39 Sartorelli DS, Cardoso MA. [Association between dietary carbohydrates and type 2 diabetes  
33 mellitus: epidemiological evidence]. *Arq Bras Endocrinol Metabol* 2006;50:415-26.  
34
- 35 40 Erber E, Hopping BN, Grandinetti A, Park SY, Kolonel LN, Maskarinec G. Dietary patterns  
36 and risk for diabetes: the multiethnic cohort. *Diabetes Care* 2010;33:532-8.  
37
- 38 41 Sluijs I, Beulens JW, van der A DL, Spijkerman AM, Grobbee DE, van der Schouw YT.  
39 Dietary intake of total, animal, and vegetable protein and risk of type 2 diabetes in the  
40 European Prospective Investigation into Cancer and Nutrition (EPIC)-NL study. *Diabetes Care*  
41 2010;33:43-8.  
42
- 43 42 Liese AD, Weis KE, Schulz M, Toozee JA. Food intake patterns associated with incident type 2  
44 diabetes: the Insulin Resistance Atherosclerosis Study. *Diabetes Care* 2009;32:263-8.  
45
- 46 43 Colditz GA, Manson JE, Stampfer MJ, Rosner B, Willett WC, Speizer FE. Diet and risk of  
47 clinical diabetes in women. *Am J Clin Nutr* 1992;55:1018-23.  
48
- 49 44 Meyer KA, Kushi LH, Jacobs DR Jr, Slavin J, Sellers TA, Folsom AR. Carbohydrates, dietary  
50 fiber, and incident type 2 diabetes in older women. *Am J Clin Nutr* 2000;71:921-30.  
51
- 52 45 Liu S, Serdula M, Janket SJ, Cook NR, Sesso HD, Willett WC, et al. A prospective study of  
53 fruit and vegetable intake and the risk of type 2 diabetes in women. *Diabetes Care*  
54 2004;27:2993-6.  
55
- 56 46 Montonen J, Jarvinen R, Heliövaara M, Reunanen A, Aromaa A, Knekt P. Food consumption  
57 and the incidence of type II diabetes mellitus. *Eur J Clin Nutr* 2005;59:441-8.  
58
- 59 47 Villegas R, Shu XO, Gao YT, Yang G, Elasy T, Li H, et al. Vegetable but not fruit consumption  
60 reduces the risk of type 2 diabetes in Chinese women. *J Nutr* 2008;138:574-80.
- 48 Bazzano LA, Li TY, Josphipura KJ, Hu FB. Intake of fruit, vegetables, and fruit juices and risk  
of diabetes in women. *Diabetes Care* 2008;31:1311-7.

- 1  
2  
3 49 McKee LH, Latner TA. Underutilized sources of dietary fiber: a review. *Plant Foods Hum Nutr*  
4 2000;55:285-304.
- 5  
6 50 Liese AD, Roach AK, Sparks KC, Marquart L, D'Agostino RB Jr, Mayer-Davis EJ.  
7 Whole-grain intake and insulin sensitivity: the Insulin Resistance Atherosclerosis Study. *Am J*  
8 *Clin Nutr* 2003;78:965-71.
- 9  
10 51 Schulze MB, Schulz M, Heidemann C, Schienkiewitz A, Hoffmann K, Boeing H. Fiber and  
11 magnesium intake and incidence of type 2 diabetes: a prospective study and meta-analysis.  
12 *Arch Intern Med* 2007;167:956-65.
- 13  
14 52 Jenkins DJ, Wolever TM, Buckley G, Lam KY, Giudici S, Kalmusky J, et al.  
15 Low-glycemic-index starchy foods in the diabetic diet. *Am J Clin Nutr* 1988;48:248-54.
- 16  
17 53 Tarwadi K, Agte V. Potential of commonly consumed green leafy vegetables for their  
18 antioxidant capacity and its linkage with the micronutrient profile. *Int J Food Sci Nutr*  
19 2003;54:417-25.
- 20  
21 54 Hozawa A, Jacobs DR Jr, Steffes MW, Gross MD, Steffen LM, Lee DH. Associations of serum  
22 carotenoid concentrations with the development of diabetes and with insulin concentration:  
23 interaction with smoking: the Coronary Artery Risk Development in Young Adults (CARDIA)  
24 Study. *Am J Epidemiol* 2006;163:929-37.
- 25  
26 55 Harding AH, Wareham NJ, Bingham SA, Khaw K, Luben R, Welch A, et al. Plasma vitamin C  
27 level, fruit and vegetable consumption, and the risk of new-onset type 2 diabetes mellitus: the  
28 European prospective investigation of cancer--Norfolk prospective study. *Arch Intern Med*  
29 2008;168:1493-9.
- 30  
31 56 Liu S, Ajani U, Chae C, Hennekens C, Buring JE, Manson JE. Long-term beta-carotene  
32 supplementation and risk of type 2 diabetes mellitus: a randomized controlled trial. *JAMA*  
33 1999;282:1073-5.
- 34  
35 57 Ceriello A, Motz E. Is oxidative stress the pathogenic mechanism underlying insulin resistance,  
36 diabetes, and cardiovascular disease? The common soil hypothesis revisited. *Arterioscler*  
37 *Thromb Vasc Biol* 2004;24:816-23.
- 38  
39 58 Larsson SC, Wolk A. Magnesium intake and risk of type 2 diabetes: a meta-analysis. *J Intern*  
40 *Med* 2007;262:208-14.
- 41  
42 59 Feskanich D, Rimm EB, Giovannucci EL, Colditz GA, Stampfer MJ, Litin LB, et al.  
43 Reproducibility and validity of food intake measurements from a semiquantitative food  
44 frequency questionnaire. *J Am Diet Assoc* 1993;93:790-6.
- 45  
46 60 Bingham SA, Welch AA, McTaggart A, Mulligan AA, Runswick SA, Luben R, et al.  
47 Nutritional methods in the European Prospective Investigation of Cancer in Norfolk. *Public*  
48 *Health Nutr* 2001;4:847-58.
- 49  
50  
51  
52  
53  
54  
55  
56  
57  
58  
59  
60

**Table 1. Subgroup analyses to investigate differences between studies included in meta-analysis (highest versus lowest category)**

| Variables                     | Fruit only |                     |         | Vegetables only |                     |         | Fruit and vegetables |                     |         | Green leafy vegetables |                     |         |
|-------------------------------|------------|---------------------|---------|-----------------|---------------------|---------|----------------------|---------------------|---------|------------------------|---------------------|---------|
|                               | No         | Pooled RR (95% CI)  | P value | No              | Pooled RR (95% CI)  | P value | No                   | Pooled RR (95% CI)  | P value | No                     | Pooled RR (95% CI)  | P value |
| Location                      |            |                     |         |                 |                     |         |                      |                     |         |                        |                     |         |
| Non-Asia                      | 10         | 0.92 (0.85 to 0.98) | 0.013   | 7               | 0.95 (0.86 to 1.04) | 0.280   | 7                    | 0.94 (0.84 to 1.04) | 0.223   | 4                      | 0.89 (0.81 to 0.97) | 0.012   |
| Asia                          | 3          | 0.96 (0.82 to 1.12) | 0.584   | 3               | 0.77 (0.60 to 0.98) | 0.032   | 2                    | 0.97 (0.75 to 1.25) | 0.827   | 3                      | 0.80 (0.69 to 0.93) | 0.004   |
| Quality                       |            |                     |         |                 |                     |         |                      |                     |         |                        |                     |         |
| High ( $\geq 4$ )             | 5          | 0.89 (0.84 to 0.95) | 0.001   | 2               | 0.83 (0.52 to 1.33) | 0.448   | 1                    | 1.04 (0.87 to 1.25) | 0.671   | 2                      | 0.86 (0.76 to 0.98) | 0.024   |
| Low ( $< 4$ )                 | 8          | 0.95 (0.86 to 1.05) | 0.288   | 8               | 0.92 (0.84 to 1.01) | 0.066   | 8                    | 0.93 (0.84 to 1.02) | 0.138   | 5                      | 0.86 (0.77 to 0.97) | 0.010   |
| Duration of follow-up (years) |            |                     |         |                 |                     |         |                      |                     |         |                        |                     |         |
| $\geq 10$                     | 6          | 0.88 (0.82 to 0.94) | 0.736   | 4               | 0.91 (0.79 to 1.05) | 0.190   | 5                    | 0.89 (0.77 to 1.02) | 0.098   | 3                      | 0.85 (0.75 to 0.97) | 0.014   |
| $< 10$                        | 7          | 0.99 (0.91 to 1.07) | 0.000   | 6               | 0.88 (0.73 to 1.06) | 0.175   | 4                    | 1.03 (0.91 to 1.16) | 0.674   | 4                      | 0.87 (0.78 to 0.97) | 0.013   |
| Sex                           |            |                     |         |                 |                     |         |                      |                     |         |                        |                     |         |
| M and F                       | 5          | 0.88 (0.79 to 0.98) | 0.022   | 5               | 0.89 (0.81 to 0.97) | 0.010   | 6                    | 0.87 (0.77 to 0.98) | 0.026   | 4                      | 0.80 (0.69 to 0.92) | 0.002   |
| F only                        | 7          | 0.93 (0.86 to 1.01) | 0.076   | 5               | 0.92 (0.76 to 1.11) | 0.364   | 3                    | 1.02 (0.94 to 1.11) | 0.610   | 3                      | 0.89 (0.81 to 0.98) | 0.014   |
| M only                        | 1          | 0.99 (0.82 to 1.19) | 0.916   | 0               | -                   | -       | 0                    | -                   | -       | 0                      | -                   | -       |
| Fractions of distribution     |            |                     |         |                 |                     |         |                      |                     |         |                        |                     |         |
| Thirds                        | 1          | 0.91 (0.71 to 1.16) | 0.451   | 1               | 0.94 (0.84 to 1.05) | 0.277   | 1                    | 0.90 (0.80 to 1.01) | 0.076   | 1                      | 0.84 (0.65 to 1.08) | 0.170   |
| Quarters                      | 3          | 0.92 (0.81 to 1.04) | 0.193   | 3               | 0.77 (0.60 to 0.98) | 0.032   | 2                    | 0.97 (0.75 to 1.25) | 0.827   | 3                      | 0.80 (0.69 to 0.93) | 0.004   |
| Fifths                        | 9          | 0.92 (0.85 to 1.00) | 0.046   | 6               | 0.94 (0.83 to 1.07) | 0.338   | 6                    | 0.94 (0.82 to 1.08) | 0.385   | 3                      | 0.89 (0.78 to 1.01) | 0.062   |
| No of participants            |            |                     |         |                 |                     |         |                      |                     |         |                        |                     |         |
| $\geq 50000$                  | 5          | 0.89 (0.83 to 0.95) | 0.001   | 3               | 0.82 (0.57 to 1.17) | 0.271   | 1                    | 1.01 (0.91 to 1.13) | 0.858   | 2                      | 0.86 (0.76 to 0.98) | 0.024   |
| $< 50000$                     | 8          | 0.95 (0.87 to 1.04) | 0.237   | 7               | 0.93 (0.84 to 1.02) | 0.109   | 8                    | 0.92 (0.83 to 1.03) | 0.146   | 5                      | 0.86 (0.77 to 0.97) | 0.010   |
| No of cases                   |            |                     |         |                 |                     |         |                      |                     |         |                        |                     |         |
| $\geq 1000$                   | 6          | 0.93 (0.85 to 1.01) | 0.079   | 4               | 1.01 (0.94 to 1.08) | 0.810   | 6                    | 0.96 (0.86 to 1.07) | 0.456   | 3                      | 0.91 (0.84 to 0.98) | 0.018   |
| $< 1000$                      | 7          | 0.91 (0.83 to 1.00) | 0.061   | 6               | 0.75 (0.67 to 0.84) | 0.000   | 3                    | 0.87 (0.73 to 1.04) | 0.119   | 4                      | 0.78 (0.68 to 0.89) | 0.000   |

M=male, F=female, RR=relative risk.

# BMJ Open

## Fruit and vegetable intake and risk of type 2 diabetes mellitus: meta-analysis of prospective cohort studies

|                                 |                                                                                                                                                                                                                                                                                                                                                                                                                                                                                                                                                                                                                                                                                                                                                                                                                           |
|---------------------------------|---------------------------------------------------------------------------------------------------------------------------------------------------------------------------------------------------------------------------------------------------------------------------------------------------------------------------------------------------------------------------------------------------------------------------------------------------------------------------------------------------------------------------------------------------------------------------------------------------------------------------------------------------------------------------------------------------------------------------------------------------------------------------------------------------------------------------|
| Journal:                        | <i>BMJ Open</i>                                                                                                                                                                                                                                                                                                                                                                                                                                                                                                                                                                                                                                                                                                                                                                                                           |
| Manuscript ID:                  | bmjopen-2014-005497.R1                                                                                                                                                                                                                                                                                                                                                                                                                                                                                                                                                                                                                                                                                                                                                                                                    |
| Article Type:                   | Research                                                                                                                                                                                                                                                                                                                                                                                                                                                                                                                                                                                                                                                                                                                                                                                                                  |
| Date Submitted by the Author:   | 26-Aug-2014                                                                                                                                                                                                                                                                                                                                                                                                                                                                                                                                                                                                                                                                                                                                                                                                               |
| Complete List of Authors:       | Tang, Zhenyu; The Second Affiliated Hospital of Nanchang University, Nanchang 330006, Jiangxi Province, People's Republic of China, Department of Neurology<br>Li, Min; The Second Affiliated Hospital of Nanchang University, Nanchang 330006, Jiangxi Province, People's Republic of China, Department of Neurology<br>Fan, Yingli; The Second Affiliated Hospital of Nanchang University, Nanchang 330006, Jiangxi Province, People's Republic of China, Department of Cardiovascular<br>Zhang, Xiaowei; The Second Affiliated Hospital of Nanchang University, Nanchang 330006, Jiangxi Province, People's Republic of China, Department of Neurology<br>Hou, Wenshang; The Second Affiliated Hospital of Nanchang University, Nanchang 330006, Jiangxi Province, People's Republic of China, Department of Neurology |
| <b>Primary Subject Heading</b>: | Diabetes and endocrinology                                                                                                                                                                                                                                                                                                                                                                                                                                                                                                                                                                                                                                                                                                                                                                                                |
| Secondary Subject Heading:      | Diabetes and endocrinology, Public health                                                                                                                                                                                                                                                                                                                                                                                                                                                                                                                                                                                                                                                                                                                                                                                 |
| Keywords:                       | General diabetes < DIABETES & ENDOCRINOLOGY, Quality in health care < HEALTH SERVICES ADMINISTRATION & MANAGEMENT, Diabetes & endocrinology < INTERNAL MEDICINE                                                                                                                                                                                                                                                                                                                                                                                                                                                                                                                                                                                                                                                           |
|                                 |                                                                                                                                                                                                                                                                                                                                                                                                                                                                                                                                                                                                                                                                                                                                                                                                                           |

SCHOLARONE™  
Manuscripts

1  
2  
3  
4 **Fruit and vegetable intake and risk of type 2 diabetes mellitus:**  
5  
6 **meta-analysis of prospective cohort studies**  
7  
8

9 **Min Li** *master student*<sup>1</sup>, **Yingli Fan** *master student*<sup>2</sup>, **Xiaowei Zhang** *master*  
10 *student*<sup>1</sup>, **Wenshang Hou** *master student*<sup>1</sup>, **Zhenyu Tang** *associate professor*<sup>1</sup>  
11

12  
13  
14 <sup>1</sup>Department of Neurology, The Second Affiliated Hospital of Nanchang University, Nanchang  
15 330006, Jiangxi Province, People's Republic of China; <sup>2</sup>Department of Cardiovascular, The  
16 Second Affiliated Hospital of Nanchang University, Nanchang 330006, Jiangxi Province, People's  
17 Republic of China  
18  
19  
20

21 Correspondence to: Z Tang, Department of Neurology, The Second Affiliated Hospital of  
22 Nanchang University, No. 1, Minde Road, Nanchang, Jiangxi 330006, People's Republic of China  
23  
24  
25 zytang07016@sina.com  
26  
27  
28  
29  
30  
31  
32  
33  
34  
35  
36  
37  
38  
39  
40  
41  
42  
43  
44  
45  
46  
47  
48  
49  
50  
51  
52  
53  
54  
55  
56  
57  
58  
59  
60

## Abstract

**Objective** To clarify and quantify the potential dose-response association between the intake of fruit and vegetables and risk of type 2 diabetes.

**Design** Meta-analysis and systematic review of prospective cohort studies.

**Data source** Studies published before February 2014 identified through electronic searches using PubMed and Embase.

**Eligibility criteria for selecting studies** Prospective cohort studies with relative risks and 95% confidence intervals for type 2 diabetes according to the intake of fruit, vegetables, or fruit and vegetables.

**Results** A total of ten articles including thirteen comparisons with 24 013 cases of type 2 diabetes and 434 342 participants were included in the meta-analysis. Evidence of curve linear associations were seen between fruit and green leafy vegetables consumption and risk of type 2 diabetes ( $P=0.059$  and  $P=0.036$  for non-linearity, respectively). The summary relative risk of type 2 diabetes for an increase of 1 serving fruit consumed per day was 0.93 (95% confidence interval 0.88 to 0.99) without heterogeneity among studies ( $P=0.477$ ,  $I^2=0\%$ ). For vegetables, the combined relative risk of type 2 diabetes for an increase of 1 serving consumed per day was 0.90 (95% confidence interval 0.80 to 1.01) with moderate heterogeneity among studies ( $P=0.002$ ,  $I^2=66.5\%$ ). For green leafy vegetables, the summary relative risk of type 2 diabetes for an increase of 0.2 serving consumed per day was 0.87 (95% confidence interval 0.81 to 0.93) without heterogeneity among studies ( $P=0.496$ ,  $I^2=0\%$ ). The combined estimates showed no significant benefits of increasing the consumption of fruit and vegetables combined.

**Conclusions** Higher fruit or green leafy vegetables intake is associated with a significantly reduced risk of type 2 diabetes.

## Article summary

Strengths and limitations of this study

To our knowledge, this is the largest systematic review and meta-analysis on the intake of fruit and vegetables and risk of type 2 diabetes. We also investigated a dose-response relation between fruit, vegetables, fruit and vegetables combined consumption and risk of type 2 diabetes.

The possibility of residual confounding or confounding by unmeasured factors, which cannot be ruled out in any observational study, must be acknowledged. We cannot exclude the possibility of recall bias in the assessments of diet based on the food frequency questionnaires.

1. Health expenditure on type 2 diabetes is increasing worldwide.
2. Epidemiological studies suggest that the intake of fruit and vegetables is beneficial in delaying or preventing the development of type 2 diabetes, though results from cohort studies are controversial.
3. Higher fruit or vegetables, particularly green leafy vegetables intake is associated with a significantly reduced risk of type 2 diabetes.
4. Dose-response analyses indicated a 6% lower risk of type 2 diabetes per 1 serving/day increment of fruit intake and 13% lower risk of type 2 diabetes per 0.2 serving/day increment of green leafy vegetables intake.
5. Further evidence from preferably randomized controlled studies should explore what kind of fruit or green leafy vegetables can reduce the risk of type 2 diabetes.



## Introduction

Type 2 diabetes (T2D) is one of the most common noncommunicable diseases which is expected to affect in excess of 439 million adults worldwide by 2030,<sup>1</sup> with serious consequences for health care expenditure.<sup>2</sup> It has been estimated that the global health expenditure on diabetes is at least \$ 376 billion in 2010 and will be \$ 490 billion in 2030,<sup>3</sup> this creates a major public health burden. The prevention of T2D is thus clearly an important public health priority. In recent decades, concern has mounted regarding the premature mortality and morbidity associated with T2D, with growing interest in altering risk factors and reversing this global epidemic. Among the known risk factors for T2D, dietary factors have aroused particular attention. Lifestyle intervention trials that include dietary modification have been shown to be effective in delaying or preventing the development of T2D.<sup>4</sup> Although the effect of individual components or interactions between nutrients is still largely unknown, fruit and vegetables intake may explain some of this beneficial effect.<sup>5</sup>

To minimize the risk of dietary factors and reduce the incidence of T2D, a World Health Organization recommended the public to consume more than 400 g or five portions of combined fruit and vegetables per day for the prevention of T2D.<sup>6</sup> Nevertheless, in the Japan Public Health Center-based Prospective (JPHC) Study,<sup>7</sup> after a mean follow-up over five years, participants with the intake of fruit and vegetables may not be appreciably associated with the risk of T2D. Vegetables, especially green leafy vegetables (GLV), have been suggested to explain an apparent beneficial effect on T2D. In addition, several meta-analyses of observational studies have found that an increase in daily intake of GLV could significantly reduce the risk of T2D.<sup>5,8,9</sup> These studies were restricted by heterogeneous with respect to sample size. Additionally, recent studies involving relationship between the intake of fruit and vegetables and risk of T2D have been published from then on.<sup>5,7,10,11</sup> Furthermore, whether any dose-response relation exists between the intake of fruit and vegetables and risk of T2D is unknown. Therefore, we systematically reviewed and meta-analysed available studies to quantify the associations between dietary intake of fruit and vegetables and incidence of T2D based on identified prospective cohort studies. We pooled risk estimates for the highest versus lowest category of intake to examine the overall association. We also conducted a dose-response analysis for the trend estimation.

## Methods

### Search strategy

We carried out a systematic search of PubMed (Medline) and Embase through February 2014 for prospective cohort studies examining the association between the intake of fruit and vegetables and risk of T2D. The following key words were used in our search strategies: (“fruits” OR “vegetables” OR “citrus”) AND (“Type 2 diabetes” OR “non-insulin-dependent diabetes mellitus” OR “Diabetes Mellitus, Type 2” OR “NIDDM” OR “prediabetes” OR “impaired glucose tolerance” OR “impaired fasting glucose” OR “glucose” OR “hyperglycaemia” OR “insulin”) AND (“Follow-up studies” OR “prospective studies” OR “cohort studies” OR “longitudinal studies”). We restricted the search to human studies. No language restrictions were imposed. In addition, we scrutinized possible eligible references from relevant original papers and review articles to identify potential publications. We followed standard criteria for the performing and reporting of the meta-analyses of observational studies.<sup>12</sup>

### Study selection



Citations selected from the initial search were subsequently screened for eligibility. Studies were included in this meta-analysis if they satisfied the following criteria: (1) original studies (eg, not review articles, meeting abstracts, editorials, or commentaries); (2) prospective design (eg, not cross sectional design, case-control design); (3) the exposure of interest was the intake of fruits, vegetables, or fruit and vegetables combined; (4) the outcome was T2D; and (5) reported multivariate-adjusted risk estimates for the association between the fruit, vegetables, or fruit and vegetables combined, assessed as dietary intake, and T2D. Additionally, we excluded animal studies and letters without sufficient data. If data were reported more than once, we included the study with the longest follow-up time.

#### **Validity assessment**

Two authors (ML and YF) independently assessed all studies for quality using a modified scoring system, which allowed a total score from 0 to 6 points (6 reflecting the highest quality) on the basis of MOOSE,<sup>12</sup> QUATSO,<sup>13</sup> and STROBE.<sup>14</sup> The system was created to account for study eligibility (1 point for appropriate inclusion and exclusion criteria), outcome (1 point if diagnosis of T2D was based on accepted clinical criteria, and not solely based on self-report), exposure (1 point if fruit and vegetables consumption were assessed with a validated tool, and 1 point if fruit and vegetables consumption were appropriately categorized), statistical analysis (1 point was given if adjustment included a few variables such as age, sex, body mass index, and family history of T2D, these being proven risk factors for T2D). Another point was given for any other factors were adjusted (such as alcohol, education, and physical activity).<sup>9</sup>

#### **Data extraction**

Data were carried out independently by two other authors (XZ and WH) using a standard electronic sheets and cross-check to reach a consensus. For each study, the following information was abstracted: name of the first author, publication year, study population, geographical location, sex, age range, sample size (number of T2D cases, number of non-T2D cases, and number of participants), duration of follow-up, methods used to assess fruit and vegetables intake and ascertain T2D cases, highest and lowest of fruit and vegetables intake, and covariates adjusted for in the multivariable model. Study quality was evaluated by using the modified scoring system. All data were extracted from the published papers. If necessary, the primary authors were contacted to retrieve further information. For two studies that expressed data separately for men and women,<sup>7,15</sup> one study that included data from multiple cohorts,<sup>11</sup> we considered the analysis for each sex or cohort as an independent comparison and extracted data separately.

#### **Statistical analysis**

Within each study, we used multivariate-adjusted outcome data (expressed as relative risks and 95% confidence intervals) for risk estimates. For the present analyses we assumed hazard ratios to be a valid approximation of relative risks, we converted these values in every study by taking their natural logarithms and calculating standard errors and corresponding 95% confidence intervals. Relative risks and their standard errors were pooled with the DerSimonian and Laird random effects model, which takes into account both within-study and between-study variabilities.<sup>16</sup> When some studies included in our meta-analysis used different measurement units (eg, grams per day or portions per day or servings per day),<sup>5,10,15</sup> we standardized fruit and vegetables intake into servings per day using a standard portion size of 106 g.<sup>17</sup> As different studies might use different exposure categories (thirds, quarters, or fifths),<sup>7,11,15</sup> we used the study specific relative risk for the highest versus lowest category of fruit, vegetables, or fruit and vegetables intake for the

meta-analysis. For the dose-response analysis, the generalized least square for trend estimation method described by Greenland and Longnecker<sup>18</sup> and Orsini et al<sup>19,20</sup> was used to calculate study-specific slopes (linear trends) and 95% confidence intervals. The method requires the distributions of cases and person years for exposure categories, and median/mean of fruit, vegetables, or fruit and vegetables intake levels for each comparison group. We assigned the midpoint of the upper and lower boundaries of each comparison group to determine mean fruit, vegetables, or fruit and vegetables intake levels if the median or mean intake was not provided. When the highest category was open ended, we assumed that the average of the category was set at 1.5 times the lower boundary. Additionally, we first created restricted cubic splines with 4 knots at percentiles 5%, 35%, 65%, and 95% of the distribution.<sup>21</sup> A P value for nonlinearity was calculated by testing the null hypothesis that the coefficient of the fractional polynomials component is equal to zero. Heterogeneity among studies was evaluated using the chi-square test based on Cochran's Q test and  $I^2$  statistic at  $P < 0.10$  level of significance,<sup>16</sup> and quantification of heterogeneity was made by the  $I^2$  metric, which describes the percentage of total variation in point estimates that is due to heterogeneity rather than chance.<sup>22</sup> We considered low, moderate, and high degrees of heterogeneity to be  $I^2$  values of 25%, 50%, and 75%, respectively. To explore possible explanations for heterogeneity and to test the robustness of the association, we conducted subgroup analyses based on the location (Asia v Non-Asia), the quality of the study (high quality ( $\geq 4$ ) v lower quality ( $< 4$ ), length of follow-up ( $\geq 10$  years v  $< 10$  years), sex (male and female included v female only v male only), fractions of intake (thirds, quarters, or fifths), number of participants ( $\geq 50000$  v  $< 50000$ ), and number of cases ( $\geq 1000$  v  $< 1000$ ). We also performed the Begg rank correlation test and Egger's regression test to visualize a possible asymmetry.<sup>23-25</sup> All the statistical analyses were performed in Stata 12 (Stata Corp, College Station, TX). A threshold of  $P < 0.1$  was used to decide whether heterogeneity or publication bias was present.<sup>24</sup> In other ways, P values were 2-sided and  $P < 0.05$  was considered statistically significant.

## Results

### Literature search

Fig 1 shows the results of literature research and selection. We identified 308 articles from PubMed and 365 articles from Embase. After exclusion of duplicate records and studies that did not fulfill our inclusion criteria, 27 articles remained, and we further evaluated the full texts of these 27 publications. Of these, we excluded 17 studies as follows. Five articles were excluded owing to lack of sufficient data for estimation of relative risks.<sup>26-30</sup> Five articles were excluded because no original data could be extracted (review, type 1 diabetes, or cross sectional studies).<sup>31-35</sup> Another four articles were excluded because we deemed irrelevant.<sup>36-39</sup> We also excluded three articles because they did not give enough details on fruits, vegetables, or fruit and vegetables intake to warrant inclusion within the meta-analysis.<sup>40-42</sup> Finally, eleven articles met the inclusion criteria and were included in the meta-analysis.<sup>5,7,10,11,15,43-47</sup> Among these ten articles, Ford et al and Kurotani et al study examined male and female separately,<sup>7,11</sup> Cooper et al have two studies (study a:2012 and study b:2012) and Muraki et al report included data from two independent cohorts.<sup>15</sup> Thus, our meta-analysis included thirteen comparisons.

### Study characteristics

Supplemental tables A and B in appendix 1 show the characteristics and main outcomes extracted from the included studies, all ten articles were prospective cohort designs and participants who

1  
2  
3 were free of self reported diabetes at baseline.<sup>5,7,10,11,15,43-47</sup> In aggregate, the included studies  
4 consisted of 434 342 participants. Among the participants, we documented 24 013 cases of T2D  
5 occurred during follow-up periods ranging from 4.6 to 23 years (median of 11 years). Among 10  
6 articles, five cohorts were conducted primarily in the United States,<sup>11,15,43,44,47</sup> two articles were  
7 done in Asian countries (China and Japan)<sup>7,46</sup> and three cohorts were from European  
8 countries.<sup>5,10,45</sup> The number of participants ranged from 3704 in the EPIC-Norfolk study by  
9 Cooper et al<sup>10</sup> to 91 246 in the Nurses' Health Study II by Muraki et al.<sup>11</sup> Five studies included  
10 both male and female,<sup>5,7,10,15,45</sup> four studies included only female.<sup>43,44,46,47</sup> One article by Muraki et  
11 al reported two independent cohorts, one cohorts included only female, and another only male.<sup>11</sup>  
12 The age of participants ranged from 24 to 79 years. Six papers provided information on fruit and  
13 vegetables intake separately and combined.<sup>5,7,10,43,44,47</sup> two papers provided information on fruit  
14 and vegetables intake separately,<sup>45,46</sup> one paper provided only the combined data,<sup>15</sup> and another  
15 paper provided separate data on fruit.<sup>11</sup> Five papers also included separate data on the intake of  
16 GLV.<sup>5,7,44-46</sup> In most papers intake of fruit and vegetables was divided into fifths.<sup>11,43-47</sup> All studies  
17 provided adjusted risk estimates, results of study quality assessment (score 0-6) showed that most  
18 studies yielded a score of 3 or below (low quality).

### 19 **Fruit intake and risk of T2D**

20 11 comparisons from nine studies reported an association between fruit intake and risk of T2D,  
21 with 22 995 T2D outcomes and 424 677 participants. Overall, fruit intake was inversely  
22 associated with risk (relative risk 0.93, 95% confidence interval 0.88 to 0.99) (fig 2). We saw no  
23 heterogeneity among studies ( $P=0.477$ ,  $I^2=0\%$ ). Additionally, no evidence of substantial  
24 publication bias was observed from the Begg ( $P=0.533$ ) and Egger regression tests ( $P=0.849$ ) (see  
25 supplemental table B in appendix 1). Among 11 comparisons, seven comparisons were eligible for  
26 the dose-response analysis of fruit intake and risk of T2D. Using a restricted cubic splines model,  
27 we found a mild curvilinear association ( $P=0.059$  for non-linearity, fig 3). Dose-response analysis  
28 indicated that a 1 serving/day increment of fruit intake was associated with 6% lower risk of T2D  
29 (relative risk 0.94, 95% confidence interval 0.89 to 1.00,  $I^2=0\%$ ) (see supplemental fig A in  
30 appendix 2).

### 31 **Vegetables intake and risk of T2D**

32 Eight studies reported an association between vegetables intake and risk of T2D, with 20 933  
33 T2D outcomes and 290 927 participants. Using a random effects model summarizing all 9  
34 comparisons, we found no association between vegetables intake and risk (relative risk 0.90, 95%  
35 confidence interval 0.80 to 1.01) (fig 4). There was moderate study heterogeneity ( $P=0.002$ ,  
36  $I^2=66.5\%$ ). However, no evidence of substantial publication bias was observed from the Begg  
37 ( $P=0.602$ ) and Egger regression tests ( $P=0.176$ ) (see supplemental table B in appendix 1). Among  
38 9 comparisons, five comparisons were eligible for the trend estimation. Dose-response analysis  
39 found no association with risk of T2D per 1 serving/day increment of vegetables intake (relative  
40 risk 0.98, 95% confidence interval 0.89 to 1.08,  $I^2=45.8\%$ ) (see supplemental fig B in appendix 2).  
41 No publication bias was observed ( $P=0.117$ ). We found no evidence of a curve linear association  
42 between vegetables intake and risk ( $P=0.671$  for non-linearity, see supplemental fig C in appendix  
43 2).

### 44 **Fruit and vegetables intake and risk of T2D**

45 Information on fruit and vegetables intake and T2D were available in 9 comparisons from seven  
46 prospective studies, totalling 20 672 T2D outcomes and 232 097 participants. Overall, fruit and  
47  
48  
49  
50  
51  
52  
53  
54  
55  
56  
57  
58  
59  
60

1  
2  
3  
4  
5  
6  
7  
8  
9  
10  
11  
12  
13  
14  
15  
16  
17  
18  
19  
20  
21  
22  
23  
24  
25  
26  
27  
28  
29  
30  
31  
32  
33  
34  
35  
36  
37  
38  
39  
40  
41  
42  
43  
44  
45  
46  
47  
48  
49  
50  
51  
52  
53  
54  
55  
56  
57  
58  
59  
60

vegetables intake was not associated with risk (relative risk 0.94, 95% confidence interval 0.86 to 1.03) (see supplemental fig D in appendix 2). We saw no heterogeneity among studies ( $P=0.141$ ,  $I^2=34.6\%$ ). Additionally, no evidence of substantial publication bias was observed from the Begg ( $P=0.348$ ) and Egger regression tests ( $P=0.609$ ) (see supplemental table B in appendix 1). Among 9 comparisons, six comparisons were eligible for the dose-response analysis of fruit and vegetables intake and risk of T2D. We did not find a significant curvilinear association ( $P=0.456$  for non-linearity, see supplemental fig E in appendix 2). Dose-response analysis indicated that a 1 serving/day increment of fruit and vegetables intake (relative risk 0.96, 95% confidence interval 0.86 to 1.07,  $I^2=47.6\%$ ) (see supplemental fig F in appendix 2).

#### **GLV intake and risk of T2D**

7 comparisons from six studies reported an association between GLV intake and risk of T2D, with 19 139 T2D outcomes and 251 235 participants. Overall, GLV intake was inversely associated with risk (relative risk 0.87, 95% confidence interval 0.81 to 0.93) (fig 5). No significant heterogeneity was detected among studies ( $P=0.496$ ,  $I^2=0\%$ ). Additionally, we did not observe evidence of substantial publication bias (the Begg and Egger regression tests,  $P=0.133$  and  $P=0.101$ , respectively) (see supplemental table B in appendix 1). Among 7 comparisons, only three comparisons were eligible for the trend estimation. Using a restricted cubic splines model, we found a significant curvilinear association ( $P=0.036$  for non-linearity, fig 6). Dose-response analysis indicated that a 0.2 serving/day increment of GLV intake was associated with 13% lower risk of T2D (relative risk 0.87, 95% confidence interval 0.76 to 0.99,  $I^2=20.9\%$ ) (see supplemental fig G in appendix 2). No publication bias was observed ( $P=0.282$ ).

#### **Subgroup analyses**

To examine the stability of the primary results, we carried out subgroup analyses (table 1). The association between fruit, vegetables, or fruit and vegetables intake and risk of T2D were similar in subgroup analyses, which were separately defined study quality, length of follow-up, sex, location, number of cases or participants, and whether the different ways in which authors had grouped intake (thirds, quarters, or fifths) affected the results. The summary estimates of relative risks from each category were pooled (see supplemental table B in appendix 1). We paid close attention to the highest versus lowest category. Almost all subgroups that analysed intake of GLV showed a benefit of consuming greater quantities (fig 5). Supplemental table B in appendix 1 also showed significant reductions in risk of T2D events for consumption of fruit, vegetables, or fruit and vegetables combined.

#### **Discussion**

In this meta-analysis dietary intake of fruit, vegetables, and GLV, but not fruit and vegetables combined, were associated with a lower risk of T2D. Dose-response analyses indicated a 6% lower risk of T2D per 1 serving/day increment of fruit intake and 13% lower risk of T2D per 0.2 serving/day increment of GLV intake, but no significant trend for vegetables or fruit and vegetables combined.

#### **Results in relation to other studies**

Over the past decades, extensive prospective studies have reported the association of fruit, vegetables, or fruit and vegetables combined with T2D risk.<sup>5,7,10,11,15,43-47</sup> However, the role of dietary factors in T2D is still controversial. Some of the studies failed to find the association between fruit intake or fruit and vegetables combined and risk of T2D.<sup>8,43</sup> However, Bazzano and

1  
2  
3 colleagues analysed data from 11 different U.S. states with 18 years of follow-up and found that  
4 consumption of fruit was associated with a lower hazard of diabetes, whereas no significant  
5 association for total fruit and vegetables consumption.<sup>47</sup> Similar to previous analysis in the Nurses'  
6 Health Study, the results from three prospective longitudinal cohort studies also supported an  
7 inverse association between fruit intake and risk of T2D.<sup>11</sup> But these studies have the potential for  
8 bias due to measurement error. In addition, two cohort studies have suggested an inverse  
9 association between total fruit and vegetables consumption and risk of T2D.<sup>10,15</sup>

10  
11 A few large cohort studies have found an inverse association between vegetables consumption,  
12 especially GLV and risk of T2D.<sup>10,44-46</sup> These findings all agreed with two meta-analyses.<sup>5,9</sup> But  
13 another systematic review based on five cohort studies suggested that there was no protective  
14 association between vegetables intake and T2D.<sup>8</sup>

15  
16 Several plausible biological mechanisms have been proposed to explain abovementioned  
17 association. Fruit and vegetables are rich in fibre,<sup>48</sup> which has been shown to improve insulin  
18 sensitivity and insulin secretion to overcome insulin resistance.<sup>49</sup> However, meta-analyses showed  
19 that fruit and vegetables fibre is inconsistently associated with the risk of T2D.<sup>50</sup> On the other  
20 hand, it may contribute to a decreased incidence of T2D through their low energy density and  
21 glycemic load, and high micronutrient content.<sup>51</sup> In particular, GLV are rich in bioactive  
22 phytochemicals (such as vitamin C and carotenoids), which are known for their antioxidant  
23 properties.<sup>52-54</sup> Antioxidants in fruit and vegetables have been hypothesized to improve insulin  
24 sensitivity and protect against diabetes in several supplementation trials.<sup>55,56</sup> In addition, it also  
25 might reduce the risk of T2D due to the supply of magnesium (Mg), a recent meta-analysis  
26 detected Mg intake to be inversely associated with the risk of T2D.<sup>57</sup> Taking this evidence into  
27 consideration, it appears that the beneficial effects of vegetables, particularly GLV consumption  
28 on the risk of T2D can be mainly explained by antioxidant vitamins and magnesium. The inverse  
29 association may be also mediated through weight gain or obesity which is an established risk  
30 factor for type 2 diabetes. Fruits are low in energy, which would promote the feeling of fullness  
31 and prevent over consumption of energy-dense foods, and resulting in weight loss.<sup>54</sup> Further  
32 investigation is warranted to understand the mechanisms involved in the proposed relation  
33 between fruit, vegetables, or GLV and risk of T2D.

### 34 **Exploration of heterogeneity**

35  
36 Heterogeneity between studies was found, which did not alter much in the subgroup analyses.  
37 There are differences in types of vegetable consumed between Asian (such as China) and  
38 Non-Asian populations. Therefore, within the subgroup analysis we examined location as a  
39 possible source of heterogeneity. As traditional Chinese diets are high in vegetables (such as GLV  
40 and cruciferous vegetables), unsurprisingly, vegetables (including GLV) intake were greater in  
41 China than the US or Europe. We also examined study quality, length of follow-up, sex, number of  
42 cases or participants, and whether the different ways in which authors had grouped intake (thirds,  
43 quarters, or fifths) as possible sources of heterogeneity, these did not show any significant  
44 heterogeneity between studies. Although the subgroup analysis could not explain the level of  
45 heterogeneity, in interpreting the results, several differences between the studies are worth  
46 discussing.

47  
48 Assessment methods of fruit, vegetables, or fruit and vegetables combined consumption differed  
49 between the studies. Most epidemiological studies used the food frequency questionnaires (FFQs)  
50 to assess quantity of fruit, vegetables, or fruit and vegetables combined intake.<sup>7,10,11,43,44,46,47</sup> It is  
51  
52  
53  
54  
55  
56  
57  
58  
59  
60



1  
2  
3 less suitable for the assessment of absolute intake, which they tend to overestimate.<sup>58,59</sup> However,  
4 two studies collected data via a single 24 hour recall and dietary history interviews,  
5 respectively.<sup>15,45</sup> These measurements may underestimate true associations between fruit,  
6 vegetables, or fruit and vegetables combined consumption and risk of T2D. In addition,  
7 calculations of daily consumption were differed (such as servings per week, servings per day, or  
8 grams per day). Although we standardized primary data using a standard portion size of 106g,  
9 conclusions should be interpreted with caution. Another possible explanation for the differences  
10 between the studies might be the classification of food groups. GLVs' criteria was inconsistent:  
11 three studies included spinach and lettuce; one included spinach and greens; others did not provide  
12 specific description. If they were included with an uniform definition of each groups, the  
13 associations might differ.

### 14 **Strengths and limitations**

15 Compared with the previous meta-analyses,<sup>5,8,9</sup> our study has several strengths. To our knowledge,  
16 this is the largest systematic review and meta-analysis on the intake of fruit and vegetables and  
17 risk of T2D. In addition, to examine the shape of these possible associations, we investigated a  
18 dose-response relation between fruit, vegetables, fruit and vegetables combined consumption and  
19 risk of T2D. Therefore, the results should be more reliable.

20 In interpreting the results, several limitations of this meta-analysis should also be acknowledged.  
21 Firstly, although in the multivariable analysis we considered a multitude of lifestyle and dietary  
22 factors. The possibility of residual confounding or confounding by unmeasured factors, which  
23 cannot be ruled out in any observational study, must be acknowledged. Second, we cannot exclude  
24 the possibility of recall bias in the assessments of diet based on the FFQs. However, the  
25 prospective study design and exclusion of participants with chronic diseases at baseline should  
26 minimize such bias. Third, the noticeable limitation of our study was the potential for bias due to  
27 inevitable measurement error, especially for individual with lower consumption levels. We  
28 attempted to reduce measurement error in adjusting for energy intake and using of cumulatively  
29 averaged intake levels. Fourth, because we had no source of information other than questionnaire  
30 for the identification of T2D, we might have underestimated the incidence of T2D. In addition,  
31 subclinical diseases at baseline might have distorted our risk estimate to some extent. Finally, the  
32 possible limitation is due to language bias. We attempted to minimize this bias by searching major  
33 electronic databases with no language restriction. However, several articles published in  
34 non-English languages might not appear in international journal databases, and could be omitted  
35 by our searches.<sup>60</sup>

### 36 **Conclusions**

37 In summary, our meta-analysis suggests that higher fruit or GLV intake is associated with a  
38 significantly reduced risk of T2D. In addition, the dose-response relations also indicate that  
39 relatively high fruit or GLV may still decrease risk of T2D. Further evidence from preferably  
40 randomized controlled studies should explore what kind of fruit or GLV can reduce the risk of  
41 T2D.  
42  
43  
44  
45  
46  
47  
48  
49  
50  
51  
52  
53  
54  
55  
56  
57  
58  
59  
60

Contributors: ML and ZT conceived and designed the study. ML and YF searched the databases and checked them according to the eligible criteria and exclusion criteria. ZT helped develop search strategies. XZ and WH extract quantitative data. YF, XZ, and WH analyzed the data. ML wrote the draft of the paper. All authors contributed to writing, reviewing, or revising the paper. ZT is the guarantor.

Funding: This work was not funded by any foundation or program.

Competing interests: All authors have completed the ICMJE uniform disclosure form at [www.icmje.org/coi\\_disclosure.pdf](http://www.icmje.org/coi_disclosure.pdf) (available on request from the corresponding author) and declare: no support from any organization for the submitted work; no financial relationships with any organizations that might have an interest in the submitted work in the previous three years; no other relationships or activities that could appear to have influenced the submitted work.

Ethical approval: Not required.

Data sharing: No additional data available.

### Figures Information

**Figure 1. Process of literature search and study selection.**

(TIFF)

**Figure 2. Random effects analysis of fully adjusted studies for highest versus lowest intake of fruit and risk of type 2 diabetes.**

(TIFF)

**Figure 3. Dose-response analyses of fruit intake and risk of type 2 diabetes.**

(TIFF)

**Figure 4. Random effects analysis of fully adjusted studies for highest versus lowest intake of vegetables and risk of type 2 diabetes.**

(TIFF)

**Figure 5. Random effects analysis of fully adjusted studies for highest versus lowest intake of green leafy vegetables and risk of type 2 diabetes.**

(TIFF)

**Figure 6. Dose-response analyses of green leafy vegetables intake and risk of type 2 diabetes.**

(TIFF)

### Appendix figure information

**Supplemental fig A. Forest plot of fruit intake and risk of type 2 diabetes.**

(TIFF)

**Supplemental fig B. Forest plot of vegetables intake and risk of type 2 diabetes.**

(TIFF)

1  
2  
3  
4 **Supplemental fig C. Dose-response analyses of vegetables intake and risk of type 2 diabetes.**  
5 **(TIFF)**  
6  
7

8 **Supplemental fig D. Random effects analysis of fully adjusted studies for highest versus**  
9 **lowest intake of fruit and vegetables and risk of type 2 diabetes.**  
10 **(TIFF)**  
11  
12

13 **Supplemental fig E. Dose-response analyses of fruit and vegetables intake and risk of type 2**  
14 **diabetes.**  
15 **(TIFF)**  
16  
17

18 **Supplemental fig F. Forest plot of fruit and vegetables intake and risk of type 2 diabetes.**  
19 **(TIFF)**  
20  
21

22 **Supplemental fig G. Forest plot of green leafy vegetables intake and risk of type 2 diabetes.**  
23 **(TIFF)**  
24  
25  
26

- 27 1 Shaw JE, Sicree RA, Zimmet PZ. Global estimates of the prevalence of diabetes for 2010 and  
28 2030. *Diabetes Res Clin Pract* 2010;87:4-14.  
29 2 Jonsson B. Revealing the cost of Type II diabetes in Europe. *Diabetologia* 2002;45:S5-12.  
30 3 Zhang P, Zhang X, Brown J, Vistisen D, Sicree R, Shaw J, et al. Global healthcare expenditure  
31 on diabetes for 2010 and 2030. *Diabetes Res Clin Pract* 2010;87:293-301.  
32 4 Gillies CL, Abrams KR, Lambert PC, Cooper NJ, Sutton AJ, Hsu RT, et al. Pharmacological and  
33 lifestyle interventions to prevent or delay type 2 diabetes in people with impaired glucose  
34 tolerance: systematic review and meta-analysis. *BMJ* 2007;334:299.  
35 5 Cooper AJ, Forouhi NG, Ye Z, Buijsse B, Arriola L, Balkau B, et al. Fruit and vegetable intake  
36 and type 2 diabetes: EPIC-InterAct prospective study and meta-analysis. *Eur J Clin Nutr*  
37 2012;66:1082-92.  
38 6 World Health Organization/UN Food and Agriculture Organization. *Diet, Nutrition and the*  
39 *Prevention of Chronic Diseases: Report of a Joint FAO/WHO Expert Consultation*. Geneva,  
40 World Health Org., 2003 (Tech. Rep. Ser., no. 916).  
41 7 Kurotani K, Nanri A, Goto A, Mizoue T, Noda M, Kato M, et al. Vegetable and fruit intake and  
42 risk of type 2 diabetes: Japan Public Health Center-based Prospective Study. *Br J Nutr*  
43 2013;109:709-17.  
44 8 Hamer M, Chida Y. Intake of fruit, vegetables, and antioxidants and risk of type 2 diabetes:  
45 systematic review and meta-analysis. *J Hypertens* 2007;25:2361-9.  
46 9 Carter P, Gray LJ, Troughton J, Khunti K, Davies MJ. Fruit and vegetable intake and incidence  
47 of type 2 diabetes mellitus: systematic review and meta-analysis. *BMJ* 2010;341:c4229.  
48 10 Cooper AJ, Sharp SJ, Lentjes MA, Luben RN, Khaw KT, Wareham NJ, et al. A prospective  
49 study of the association between quantity and variety of fruit and vegetable intake and incident  
50 type 2 diabetes. *Diabetes Care* 2012;35:1293-300.  
51 11 Muraki I, Imamura F, Manson JE, Hu FB, Willett WC, van Dam RM, et al. Fruit consumption  
52  
53  
54  
55  
56  
57  
58  
59  
60



- and risk of type 2 diabetes: results from three prospective longitudinal cohort studies. *BMJ* 2013;347:f5001.
- 12 Stroup DF, Berlin JA, Morton SC, Olkin I, Williamson GD, Rennie D, et al. Meta-analysis of observational studies in epidemiology: a proposal for reporting. Meta-analysis Of Observational Studies in Epidemiology (MOOSE) group. *JAMA* 2000;283:2008-12.
- 13 Wong WC, Cheung CS, Hart GJ. Development of a quality assessment tool for systematic reviews of observational studies (QATSO) of HIV prevalence in men having sex with men and associated risk behaviours. *Emerg Themes Epidemiol* 2008;5:23.
- 14 von EE, Altman DG, Egger M, Pocock SJ, Gotsche PC, Vandembroucke JP. The Strengthening the Reporting of Observational Studies in Epidemiology (STROBE) statement: guidelines for reporting observational studies. *Prev Med* 2007;45:247-51.
- 15 Ford ES, Mokdad AH. Fruit and vegetable consumption and diabetes mellitus incidence among U.S. adults. *Prev Med* 2001;32:33-9.
- 16 DerSimonian R, Laird N. Meta-analysis in clinical trials. *Control Clin Trials* 1986;7:177-88.
- 17 Dauchet L, Amouyel P, Hercberg S, Dallongeville J. Fruit and vegetable consumption and risk of coronary heart disease: a meta-analysis of cohort studies. *J Nutr* 2006;136:2588-93.
- 18 Greenland S, Longnecker MP. Methods for trend estimation from summarized dose-response data, with applications to meta-analysis. *Am J Epidemiol* 1992;135:1301-9.
- 19 Orsini N, Bellocco R, Greenland S. Generalized least squares for trend estimation of summarized dose-response data. *Stata Journal* 2006;6:40-57.
- 20 Orsini N, Li R, Wolk A, Khudyakov P, Spiegelman D. Meta-analysis for linear and nonlinear dose-response relations: examples, an evaluation of approximations, and software. *Am J Epidemiol* 2012;175:66-73.
- 21 Harrell FE Jr, Lee KL, Pollock BG. Regression models in clinical studies: determining relationships between predictors and response. *J Natl Cancer Inst* 1988;80:1198-202.
- 22 Higgins JP, Thompson SG, Deeks JJ, Altman DG. Measuring inconsistency in meta-analyses. *BMJ* 2003;327:557-60.
- 23 Begg CB, Mazumdar M. Operating characteristics of a rank correlation test for publication bias. *Biometrics* 1994;50:1088-101.
- 24 Egger M, Davey SG, Schneider M, Minder C. Bias in meta-analysis detected by a simple, graphical test. *BMJ* 1997;315:629-34.
- 25 Peters JL, Sutton AJ, Jones DR, Abrams KR, Rushton L. Contour-enhanced meta-analysis funnel plots help distinguish publication bias from other causes of asymmetry. *J Clin Epidemiol* 2008;61:991-6.
- 26 Bauer F, Beulens JW, van der A DL, Wijnenga C, Grobbee DE, Spijkerman AM, et al. Dietary patterns and the risk of type 2 diabetes in overweight and obese individuals. *Eur J Nutr* 2013;52:1127-34.
- 27 Eshak ES, Iso H, Mizoue T, Inoue M, Noda M, Tsugane S. Soft drink, 100% fruit juice, and vegetable juice intakes and risk of diabetes mellitus. *Clin Nutr* 2013;32:300-8.
- 28 von RA, Feller S, Bergmann MM, Boeing H. Diet and risk of chronic diseases: results from the first 8 years of follow-up in the EPIC-Potsdam study. *Eur J Clin Nutr* 2013;67:412-9.
- 29 Yu R, Woo J, Chan R, Sham A, Ho S, Tso A, et al. Relationship between dietary intake and the development of type 2 diabetes in a Chinese population: the Hong Kong Dietary Survey. *Public Health Nutr* 2011;14:1133-41.

- 1  
2  
3 30 Morimoto A, Ohno Y, Tatsumi Y, Mizuno S, Watanabe S. Effects of healthy dietary pattern and  
4 other lifestyle factors on incidence of diabetes in a rural Japanese population. *Asia Pac J Clin*  
5 *Nutr* 2012;21:601-8.  
6  
7 31 Martinez-Gonzalez MA, de la Fuente-Arrillaga C, Lopez-Del-Burgo C, Vazquez-Ruiz Z,  
8 Benito S, Ruiz-Canela M. Low consumption of fruit and vegetables and risk of chronic disease:  
9 a review of the epidemiological evidence and temporal trends among Spanish graduates.  
10 *Public Health Nutr* 2011;14:2309-15.  
11  
12 32 Esposito K, Kastorini CM, Panagiotakos DB, Giugliano D. Prevention of type 2 diabetes by  
13 dietary patterns: a systematic review of prospective studies and meta-analysis. *Metab Syndr*  
14 *Relat Disord* 2010;8:471-6.  
15  
16 33 Lodefalk M, Aman J. Food habits, energy and nutrient intake in adolescents with Type 1  
17 diabetes mellitus. *Diabet Med* 2006;23:1225-32.  
18  
19 34 Zhu Y, Zhang Y, Ling W, Feng D, Wei X, Yang C, et al. Fruit consumption is associated with  
20 lower carotid intima-media thickness and C-reactive protein levels in patients with type 2  
21 diabetes mellitus. *J Am Diet Assoc* 2011;111:1536-42.  
22  
23 35 Hosseinpour-Niazi S, Mirmiran P, Sohrab G, Hosseini-Esfahani F, Azizi F. Inverse association  
24 between fruit, legume, and cereal fiber and the risk of metabolic syndrome: Tehran Lipid and  
25 Glucose Study. *Diabetes Res Clin Pract* 2011;94:276-83.  
26  
27 36 Odegaard AO, Koh WP, Arakawa K, Yu MC, Pereira MA. Soft drink and juice consumption  
28 and risk of physician-diagnosed incident type 2 diabetes: the Singapore Chinese Health Study.  
29 *Am J Epidemiol* 2010;171:701-8.  
30  
31 37 Hodge AM, English DR, O'Dea K, Giles GG. Dietary patterns and diabetes incidence in the  
32 Melbourne Collaborative Cohort Study. *Am J Epidemiol* 2007;165:603-10.  
33  
34 38 Cai H, Shu XO, Gao YT, Li H, Yang G, Zheng W. A prospective study of dietary patterns and  
35 mortality in Chinese women. *Epidemiology* 2007;18:393-401.  
36  
37 39 Sartorelli DS, Cardoso MA. [Association between dietary carbohydrates and type 2 diabetes  
38 mellitus: epidemiological evidence]. *Arq Bras Endocrinol Metabol* 2006;50:415-26.  
39  
40 40 Erber E, Hopping BN, Grandinetti A, Park SY, Kolonel LN, Maskarinec G. Dietary patterns  
41 and risk for diabetes: the multiethnic cohort. *Diabetes Care* 2010;33:532-8.  
42  
43 41 Sluijs I, Beulens JW, van der A DL, Spijkerman AM, Grobbee DE, van der Schouw YT.  
44 Dietary intake of total, animal, and vegetable protein and risk of type 2 diabetes in the  
45 European Prospective Investigation into Cancer and Nutrition (EPIC)-NL study. *Diabetes Care*  
46 2010;33:43-8.  
47  
48 42 Liese AD, Weis KE, Schulz M, Tooze JA. Food intake patterns associated with incident type 2  
49 diabetes: the Insulin Resistance Atherosclerosis Study. *Diabetes Care* 2009;32:263-8.  
50  
51 43 Meyer KA, Kushi LH, Jacobs DR Jr, Slavin J, Sellers TA, Folsom AR. Carbohydrates, dietary  
52 fiber, and incident type 2 diabetes in older women. *Am J Clin Nutr* 2000;71:921-30.  
53  
54 44 Liu S, Serdula M, Janket SJ, Cook NR, Sesso HD, Willett WC, et al. A prospective study of  
55 fruit and vegetable intake and the risk of type 2 diabetes in women. *Diabetes Care*  
56 2004;27:2993-6.  
57  
58 45 Montonen J, Jarvinen R, Heliövaara M, Reunanen A, Aromaa A, Knekt P. Food consumption  
59 and the incidence of type II diabetes mellitus. *Eur J Clin Nutr* 2005;59:441-8.  
60  
61 46 Villegas R, Shu XO, Gao YT, Yang G, Elasy T, Li H, et al. Vegetable but not fruit consumption  
62 reduces the risk of type 2 diabetes in Chinese women. *J Nutr* 2008;138:574-80.

- 1  
2  
3 47 Bazzano LA, Li TY, Joshipura KJ, Hu FB. Intake of fruit, vegetables, and fruit juices and risk  
4 of diabetes in women. *Diabetes Care* 2008;31:1311-7.  
5  
6 48 McKee LH, Latner TA. Underutilized sources of dietary fiber: a review. *Plant Foods Hum Nutr*  
7 2000;55:285-304.  
8  
9 49 Liese AD, Roach AK, Sparks KC, Marquart L, D'Agostino RB Jr, Mayer-Davis EJ.  
10 Whole-grain intake and insulin sensitivity: the Insulin Resistance Atherosclerosis Study. *Am J*  
11 *Clin Nutr* 2003;78:965-71.  
12  
13 50 Schulze MB, Schulz M, Heidemann C, Schienkiewitz A, Hoffmann K, Boeing H. Fiber and  
14 magnesium intake and incidence of type 2 diabetes: a prospective study and meta-analysis.  
15 *Arch Intern Med* 2007;167:956-65.  
16  
17 51 Jenkins DJ, Wolever TM, Buckley G, Lam KY, Giudici S, Kalmusky J, et al.  
18 Low-glycemic-index starchy foods in the diabetic diet. *Am J Clin Nutr* 1988;48:248-54.  
19  
20 52 Tarwadi K, Agte V. Potential of commonly consumed green leafy vegetables for their  
21 antioxidant capacity and its linkage with the micronutrient profile. *Int J Food Sci Nutr*  
22 2003;54:417-25.  
23  
24 53 Hozawa A, Jacobs DR Jr, Steffes MW, Gross MD, Steffen LM, Lee DH. Associations of serum  
25 carotenoid concentrations with the development of diabetes and with insulin concentration:  
26 interaction with smoking: the Coronary Artery Risk Development in Young Adults (CARDIA)  
27 Study. *Am J Epidemiol* 2006;163:929-37.  
28  
29 54 Harding AH, Wareham NJ, Bingham SA, Khaw K, Luben R, Welch A, et al. Plasma vitamin C  
30 level, fruit and vegetable consumption, and the risk of new-onset type 2 diabetes mellitus: the  
31 European prospective investigation of cancer--Norfolk prospective study. *Arch Intern Med*  
32 2008;168:1493-9.  
33  
34 55 Liu S, Ajani U, Chae C, Hennekens C, Buring JE, Manson JE. Long-term beta-carotene  
35 supplementation and risk of type 2 diabetes mellitus: a randomized controlled trial. *JAMA*  
36 1999;282:1073-5.  
37  
38 56 Ceriello A, Motz E. Is oxidative stress the pathogenic mechanism underlying insulin resistance,  
39 diabetes, and cardiovascular disease? The common soil hypothesis revisited. *Arterioscler*  
40 *Thromb Vasc Biol* 2004;24:816-23.  
41  
42 57 Larsson SC, Wolk A. Magnesium intake and risk of type 2 diabetes: a meta-analysis. *J Intern*  
43 *Med* 2007;262:208-14.  
44  
45 58 Feskanich D, Rimm EB, Giovannucci EL, Colditz GA, Stampfer MJ, Litin LB, et al.  
46 Reproducibility and validity of food intake measurements from a semiquantitative food  
47 frequency questionnaire. *J Am Diet Assoc* 1993;93:790-6.  
48  
49 59 Bingham SA, Welch AA, McTaggart A, Mulligan AA, Runswick SA, Luben R, et al.  
50 Nutritional methods in the European Prospective Investigation of Cancer in Norfolk. *Public*  
51 *Health Nutr* 2001;4:847-58.  
52  
53 60 Li M, Hou W, Zhang X, Hu L, Tang Z. Hyperuricemia and risk of stroke: a systematic review  
54 and meta-analysis of prospective studies. *Atherosclerosis* 2014;232:265-70.  
55  
56  
57  
58  
59  
60

1  
2  
3  
4  
5  
6  
7  
8  
9  
10  
11  
12  
13  
14  
15  
16  
17  
18  
19  
20  
21  
22  
23  
24  
25  
26  
27  
28  
29  
30  
31  
32  
33  
34  
35  
36  
37  
38  
39  
40  
41  
42  
43  
44  
45  
46  
47  
48  
49  
50  
51  
52  
53  
54  
55  
56  
57  
58  
59  
60

For peer review only

**Table 1. Subgroup analyses to investigate differences between studies included in meta-analysis (highest versus lowest category)**

| Variables                     | Fruit only |                     |         | Vegetables only |                     |         | Fruit and vegetables |                     |         | Green leafy vegetables |                     |         |
|-------------------------------|------------|---------------------|---------|-----------------|---------------------|---------|----------------------|---------------------|---------|------------------------|---------------------|---------|
|                               | No         | Pooled RR (95% CI)  | P value | No              | Pooled RR (95% CI)  | P value | No                   | Pooled RR (95% CI)  | P value | No                     | Pooled RR (95% CI)  | P value |
| Location                      |            |                     |         |                 |                     |         |                      |                     |         |                        |                     |         |
| Non-Asia                      | 8          | 0.93 (0.87 to 1.00) | 0.049   | 6               | 0.96 (0.87 to 1.06) | 0.397   | 7                    | 0.94 (0.84 to 1.04) | 0.223   | 4                      | 0.89 (0.81 to 0.97) | 0.012   |
| Asia                          | 3          | 0.96 (0.82 to 1.12) | 0.584   | 3               | 0.77 (0.60 to 0.98) | 0.032   | 2                    | 0.97 (0.75 to 1.25) | 0.827   | 3                      | 0.80 (0.69 to 0.93) | 0.004   |
| Quality                       |            |                     |         |                 |                     |         |                      |                     |         |                        |                     |         |
| High ( $\geq 4$ )             | 4          | 0.92 (0.86 to 1.00) | 0.045   | 2               | 0.83 (0.52 to 1.33) | 0.448   | 1                    | 1.04 (0.87 to 1.25) | 0.671   | 2                      | 0.86 (0.76 to 0.98) | 0.024   |
| Low ( $< 4$ )                 | 7          | 0.94 (0.85 to 1.04) | 0.240   | 7               | 0.93 (0.84 to 1.02) | 0.109   | 8                    | 0.93 (0.84 to 1.02) | 0.138   | 5                      | 0.86 (0.77 to 0.97) | 0.010   |
| Duration of follow-up (years) |            |                     |         |                 |                     |         |                      |                     |         |                        |                     |         |
| $\geq 10$                     | 5          | 0.90 (0.83 to 0.97) | 0.006   | 4               | 0.91 (0.79 to 1.05) | 0.190   | 5                    | 0.89 (0.77 to 1.02) | 0.098   | 3                      | 0.85 (0.75 to 0.97) | 0.014   |
| $< 10$                        | 6          | 0.98 (0.90 to 1.07) | 0.654   | 5               | 0.89 (0.72 to 1.10) | 0.296   | 4                    | 1.03 (0.91 to 1.16) | 0.674   | 4                      | 0.87 (0.78 to 0.97) | 0.013   |
| Sex                           |            |                     |         |                 |                     |         |                      |                     |         |                        |                     |         |
| M and F                       | 5          | 0.88 (0.79 to 0.98) | 0.022   | 5               | 0.89 (0.81 to 0.97) | 0.010   | 6                    | 0.87 (0.77 to 0.98) | 0.026   | 4                      | 0.80 (0.69 to 0.92) | 0.002   |
| F only                        | 5          | 0.95 (0.88 to 1.02) | 0.168   | 4               | 0.94 (0.77 to 1.15) | 0.544   | 3                    | 1.02 (0.94 to 1.11) | 0.610   | 3                      | 0.89 (0.81 to 0.98) | 0.014   |
| M only                        | 1          | 0.99 (0.82 to 1.19) | 0.916   | 0               | -                   | -       | 0                    | -                   | -       | 0                      | -                   | -       |
| Fractions of distribution     |            |                     |         |                 |                     |         |                      |                     |         |                        |                     |         |
| Thirds                        | 1          | 0.91 (0.71 to 1.16) | 0.451   | 1               | 0.94 (0.84 to 1.05) | 0.277   | 1                    | 0.90 (0.80 to 1.01) | 0.076   | 1                      | 0.84 (0.65 to 1.08) | 0.170   |
| Quarters                      | 3          | 0.92 (0.81 to 1.04) | 0.193   | 3               | 0.77 (0.60 to 0.98) | 0.032   | 2                    | 0.97 (0.75 to 1.25) | 0.827   | 3                      | 0.80 (0.69 to 0.93) | 0.004   |
| Fifths                        | 7          | 0.94 (0.87 to 1.02) | 0.144   | 5               | 0.96 (0.84 to 1.09) | 0.499   | 6                    | 0.94 (0.82 to 1.08) | 0.385   | 3                      | 0.89 (0.78 to 1.01) | 0.062   |
| No of participants            |            |                     |         |                 |                     |         |                      |                     |         |                        |                     |         |
| $\geq 50000$                  | 3          | 0.91 (0.84 to 0.99) | 0.032   | 2               | 0.83 (0.52 to 1.33) | 0.448   | 1                    | 1.01 (0.91 to 1.13) | 0.858   | 2                      | 0.86 (0.76 to 0.98) | 0.024   |
| $< 50000$                     | 8          | 0.95 (0.87 to 1.04) | 0.237   | 7               | 0.93 (0.84 to 1.02) | 0.109   | 8                    | 0.92 (0.83 to 1.03) | 0.146   | 5                      | 0.86 (0.77 to 0.97) | 0.010   |
| No of cases                   |            |                     |         |                 |                     |         |                      |                     |         |                        |                     |         |
| $\geq 1000$                   | 5          | 0.95 (0.88 to 1.03) | 0.233   | 4               | 1.01 (0.94 to 1.08) | 0.810   | 6                    | 0.96 (0.86 to 1.07) | 0.456   | 3                      | 0.91 (0.84 to 0.98) | 0.018   |
| $< 1000$                      | 6          | 0.91 (0.82 to 1.00) | 0.042   | 5               | 0.75 (0.66 to 0.85) | 0.000   | 3                    | 0.87 (0.73 to 1.04) | 0.119   | 4                      | 0.78 (0.68 to 0.89) | 0.000   |

M=male, F=female, RR=relative risk.

1  
2  
3  
4 **Fruit and vegetable intake and risk of type 2 diabetes mellitus:**  
5  
6 **meta-analysis of prospective cohort studies**  
7  
8

9 **Min Li** *master student*<sup>1</sup>, **Yingli Fan** *master student*<sup>2</sup>, **Xiaowei Zhang** *master*  
10 *student*<sup>1</sup>, **Wenshang Hou** *master student*<sup>1</sup>, **Zhenyu Tang** *associate professor*<sup>1</sup>  
11

12  
13  
14 <sup>1</sup>Department of Neurology, The Second Affiliated Hospital of Nanchang University, Nanchang  
15 330006, Jiangxi Province, People's Republic of China; <sup>2</sup>Department of Cardiovascular, The  
16 Second Affiliated Hospital of Nanchang University, Nanchang 330006, Jiangxi Province, People's  
17 Republic of China  
18  
19  
20

21 Correspondence to: Z Tang, Department of Neurology, The Second Affiliated Hospital of  
22 Nanchang University, No. 1, Minde Road, Nanchang, Jiangxi 330006, People's Republic of China  
23  
24  
25 zytang07016@sina.com  
26  
27  
28  
29  
30  
31  
32  
33  
34  
35  
36  
37  
38  
39  
40  
41  
42  
43  
44  
45  
46  
47  
48  
49  
50  
51  
52  
53  
54  
55  
56  
57  
58  
59  
60

## Abstract

**Objective** To clarify and quantify the potential dose-response association between the intake of fruit and vegetables and risk of type 2 diabetes.

**Design** Meta-analysis and systematic review of prospective cohort studies.

**Data source** Studies published before February 2014 identified through electronic searches using PubMed and Embase.

**Eligibility criteria for selecting studies** Prospective cohort studies with relative risks and 95% confidence intervals for type 2 diabetes according to the intake of fruit, vegetables, or fruit and vegetables.

**Results** A total of ten articles including thirteen comparisons with 24 013 cases of type 2 diabetes and 434 342 participants were included in the meta-analysis. Evidence of curve linear associations were seen between fruit and green leafy vegetables consumption and risk of type 2 diabetes ( $P=0.059$  and  $P=0.036$  for non-linearity, respectively). The summary relative risk of type 2 diabetes for an increase of 1 serving fruit consumed per day was 0.93 (95% confidence interval 0.88 to 0.99) without heterogeneity among studies ( $P=0.477$ ,  $I^2=0\%$ ). For vegetables, the combined relative risk of type 2 diabetes for an increase of 1 serving consumed per day was 0.90 (95% confidence interval 0.80 to 1.01) with moderate heterogeneity among studies ( $P=0.002$ ,  $I^2=66.5\%$ ). For green leafy vegetables, the summary relative risk of type 2 diabetes for an increase of 0.2 serving consumed per day was 0.87 (95% confidence interval 0.81 to 0.93) without heterogeneity among studies ( $P=0.496$ ,  $I^2=0\%$ ). The combined estimates showed no significant benefits of increasing the consumption of fruit and vegetables combined.

**Conclusions** Higher fruit or green leafy vegetables intake is associated with a significantly reduced risk of type 2 diabetes.

## Article summary

Strengths and limitations of this study

To our knowledge, this is the largest systematic review and meta-analysis on the intake of fruit and vegetables and risk of type 2 diabetes. We also investigated a dose-response relation between fruit, vegetables, fruit and vegetables combined consumption and risk of type 2 diabetes.

The possibility of residual confounding or confounding by unmeasured factors, which cannot be ruled out in any observational study, must be acknowledged. We cannot exclude the possibility of recall bias in the assessments of diet based on the food frequency questionnaires.

1. Health expenditure on type 2 diabetes is increasing worldwide.
2. Epidemiological studies suggest that the intake of fruit and vegetables is beneficial in delaying or preventing the development of type 2 diabetes, though results from cohort studies are controversial.
3. Higher fruit or vegetables, particularly green leafy vegetables intake is associated with a significantly reduced risk of type 2 diabetes.
4. Dose-response analyses indicated a 6% lower risk of type 2 diabetes per 1 serving/day increment of fruit intake and 13% lower risk of type 2 diabetes per 0.2 serving/day increment of green leafy vegetables intake.
5. Further evidence from preferably randomized controlled studies should explore what kind of fruit or **green leafy vegetables** can reduce the risk of type 2 diabetes.



## Introduction

Type 2 diabetes (T2D) is one of the most common noncommunicable diseases which is expected to affect in excess of 439 million adults worldwide by 2030,<sup>1</sup> with serious consequences for health care expenditure.<sup>2</sup> It has been estimated that the global health expenditure on diabetes is at least \$ 376 billion in 2010 and will be \$ 490 billion in 2030,<sup>3</sup> this creates a major public health burden. The prevention of T2D is thus clearly an important public health priority. In recent decades, concern has mounted regarding the premature mortality and morbidity associated with T2D, with growing interest in altering risk factors and reversing this global epidemic. Among the known risk factors for T2D, dietary factors have aroused particular attention. Lifestyle intervention trials that include dietary modification have been shown to be effective in delaying or preventing the development of T2D.<sup>4</sup> Although the effect of individual components or interactions between nutrients is still largely unknown, fruit and vegetables intake may explain some of this beneficial effect.<sup>5</sup>

To minimize the risk of dietary factors and reduce the incidence of T2D, a World Health Organization recommended the public to consume more than 400 g or five portions of combined fruit and vegetables per day for the prevention of T2D.<sup>6</sup> Nevertheless, in the Japan Public Health Center-based Prospective (JPHC) Study,<sup>7</sup> after a mean follow-up over five years, participants with the intake of fruit and vegetables may not be appreciably associated with the risk of T2D. Vegetables, especially green leafy vegetables (GLV), have been suggested to explain an apparent beneficial effect on T2D. In addition, several meta-analyses of observational studies have found that an increase in daily intake of GLV could significantly reduce the risk of T2D.<sup>5,8,9</sup> These studies were restricted by heterogeneous with respect to sample size. Additionally, recent studies involving relationship between the intake of fruit and vegetables and risk of T2D have been published from then on.<sup>5,7,10,11</sup> Furthermore, whether any dose-response relation exists between the intake of fruit and vegetables and risk of T2D is unknown. Therefore, we systematically reviewed and meta-analysed available studies to quantify the associations between dietary intake of fruit and vegetables and incidence of T2D based on identified prospective cohort studies. We pooled risk estimates for the highest versus lowest category of intake to examine the overall association. We also conducted a dose-response analysis for the trend estimation.

## Methods

### Search strategy

We carried out a systematic search of PubMed (Medline) and Embase through February 2014 for prospective cohort studies examining the association between the intake of fruit and vegetables and risk of T2D. The following key words were used in our search strategies: (“fruits” OR “vegetables” OR “citrus”) AND (“Type 2 diabetes” OR “non-insulin-dependent diabetes mellitus” OR “Diabetes Mellitus, Type 2” OR “NIDDM” OR “prediabetes” OR “impaired glucose tolerance” OR “impaired fasting glucose” OR “glucose” OR “hyperglycaemia” OR “insulin”) AND (“Follow-up studies” OR “prospective studies” OR “cohort studies” OR “longitudinal studies”). We restricted the search to human studies. No language restrictions were imposed. In addition, we scrutinized possible eligible references from relevant original papers and review articles to identify potential publications. We followed standard criteria for the performing and reporting of the meta-analyses of observational studies.<sup>12</sup>

### Study selection



1  
2  
3 Citations selected from the initial search were subsequently screened for eligibility. Studies were  
4 included in this meta-analysis if they satisfied the following criteria: (1) original studies (eg, not  
5 review articles, meeting abstracts, editorials, or commentaries); (2) prospective design (eg, not  
6 cross sectional design, case-control design); (3) the exposure of interest was the intake of fruits,  
7 vegetables, or fruit and vegetables combined; (4) the outcome was T2D; and (5) reported  
8 multivariate-adjusted risk estimates for the association between the fruit, vegetables, or fruit and  
9 vegetables combined, assessed as dietary intake, and T2D. Additionally, we excluded animal  
10 studies and letters without sufficient data. If data were reported more than once, we included the  
11 study with the longest follow-up time.

#### 14 **Validity assessment**

15 Two authors (ML and YF) independently assessed all studies for quality using a modified scoring  
16 system, which allowed a total score from 0 to 6 points (6 reflecting the highest quality) on the  
17 basis of MOOSE,<sup>12</sup> QUATSO,<sup>13</sup> and STROBE.<sup>14</sup> The system was created to account for study  
18 eligibility (1 point for appropriate inclusion and exclusion criteria), outcome (1 point if diagnosis  
19 of T2D was based on accepted clinical criteria, and not solely based on self-report), exposure (1  
20 point if fruit and vegetables consumption were assessed with a validated tool, and 1 point if fruit  
21 and vegetables consumption were appropriately categorized), statistical analysis (1 point was  
22 given if adjustment included a few variables such as age, sex, body mass index, and family history  
23 of T2D, these being proven risk factors for T2D). **Another point was given for any other factors  
24 were adjusted (such as alcohol, education, and physical activity).**<sup>9</sup>

#### 28 **Data extraction**

29 Data were carried out independently by two other authors (XZ and WH) using a standard  
30 electronic sheets and cross-check to reach a consensus. For each study, the following information  
31 was abstracted: name of the first author, publication year, study population, geographical location,  
32 sex, age range, sample size (number of T2D cases, number of non-T2D cases, and number of  
33 participants), duration of follow-up, methods used to assess fruit and vegetables intake and  
34 ascertain T2D cases, highest and lowest of fruit and vegetables intake, and covariates adjusted for  
35 in the multivariable model. Study quality was evaluated by using the modified scoring system. All  
36 data were extracted from the published papers. If necessary, the primary authors were contacted to  
37 retrieve further information. For two studies that expressed data separately for men and women,<sup>7,15</sup>  
38 one study that included data from multiple cohorts,<sup>11</sup> we considered the analysis for each sex or  
39 cohort as an independent comparison and extracted data separately.

#### 44 **Statistical analysis**

45 Within each study, we used multivariate-adjusted outcome data (expressed as relative risks and  
46 95% confidence intervals) for risk estimates. For the present analyses we assumed hazard ratios to  
47 be a valid approximation of relative risks, we converted these values in every study by taking their  
48 natural logarithms and calculating standard errors and corresponding 95% confidence intervals.  
49 Relative risks and their standard errors were pooled with the DerSimonian and Laird random  
50 effects model, which takes into account both within-study and between-study variabilities.<sup>16</sup> When  
51 some studies included in our meta-analysis used different measurement units (eg, grams per day or  
52 portions per day or servings per day),<sup>5,10,15</sup> we standardized fruit and vegetables intake into  
53 servings per day using a standard portion size of 106 g.<sup>17</sup> **As different studies might use different  
54 exposure categories (thirds, quarters, or fifths),<sup>7,11,15</sup> we used the study specific relative risk for the  
55 highest versus lowest category of fruit, vegetables, or fruit and vegetables intake for the  
56  
57  
58  
59  
60**

meta-analysis. For the dose-response analysis, the generalized least square for trend estimation method described by Greenland and Longnecker<sup>18</sup> and Orsini et al<sup>19,20</sup> was used to calculate study-specific slopes (linear trends) and 95% confidence intervals. The method requires the distributions of cases and person years for exposure categories, and median/mean of fruit, vegetables, or fruit and vegetables intake levels for each comparison group. We assigned the midpoint of the upper and lower boundaries of each comparison group to determine mean fruit, vegetables, or fruit and vegetables intake levels if the median or mean intake was not provided. When the highest category was open ended, we assumed that the average of the category was set at 1.5 times the lower boundary. Additionally, we first created restricted cubic splines with 4 knots at percentiles 5%, 35%, 65%, and 95% of the distribution.<sup>21</sup> A P value for nonlinearity was calculated by testing the null hypothesis that the coefficient of the fractional polynomials component is equal to zero. Heterogeneity among studies was evaluated using the chi-square test based on Cochran's Q test and  $I^2$  statistic at  $P < 0.10$  level of significance,<sup>16</sup> and quantification of heterogeneity was made by the  $I^2$  metric, which describes the percentage of total variation in point estimates that is due to heterogeneity rather than chance.<sup>22</sup> We considered low, moderate, and high degrees of heterogeneity to be  $I^2$  values of 25%, 50%, and 75%, respectively. To explore possible explanations for heterogeneity and to test the robustness of the association, we conducted subgroup analyses based on the location (Asia v Non-Asia), the quality of the study (high quality ( $\geq 4$ ) v lower quality ( $< 4$ ), length of follow-up ( $\geq 10$  years v  $< 10$  years), sex (male and female included v female only v male only), fractions of intake (thirds, quarters, or fifths), number of participants ( $\geq 50000$  v  $< 50000$ ), and number of cases ( $\geq 1000$  v  $< 1000$ ). We also performed the Begg rank correlation test and Egger's regression test to visualize a possible asymmetry.<sup>23-25</sup> All the statistical analyses were performed in Stata 12 (Stata Corp, College Station, TX). A threshold of  $P < 0.1$  was used to decide whether heterogeneity or publication bias was present.<sup>24</sup> In other ways, P values were 2-sided and  $P < 0.05$  was considered statistically significant.

## Results

### Literature search

Fig 1 shows the results of literature research and selection. We identified 308 articles from PubMed and 365 articles from Embase. After exclusion of duplicate records and studies that did not fulfill our inclusion criteria, 27 articles remained, and we further evaluated the full texts of these 27 publications. Of these, we excluded 17 studies as follows. Five articles were excluded owing to lack of sufficient data for estimation of relative risks.<sup>26-30</sup> Five articles were excluded because no original data could be extracted (review, type 1 diabetes, or cross sectional studies).<sup>31-35</sup> Another four articles were excluded because we deemed irrelevant.<sup>36-39</sup> We also excluded three articles because they did not give enough details on fruits, vegetables, or fruit and vegetables intake to warrant inclusion within the meta-analysis.<sup>40-42</sup> Finally, eleven articles met the inclusion criteria and were included in the meta-analysis.<sup>5,7,10,11,15,43-47</sup> Among these ten articles, Ford et al and Kurotani et al study examined male and female separately,<sup>7,11</sup> Cooper et al have two studies (study a:2012 and study b:2012) and Muraki et al report included data from two independent cohorts.<sup>15</sup> Thus, our meta-analysis included thirteen comparisons.

### Study characteristics

Supplemental tables A and B in appendix 1 show the characteristics and main outcomes extracted from the included studies, all ten articles were prospective cohort designs and participants who

1  
2  
3 were free of self reported diabetes at baseline.<sup>5,7,10,11,15,43-47</sup> In aggregate, the included studies  
4 consisted of 434 342 participants. Among the participants, we documented 24 013 cases of T2D  
5 occurred during follow-up periods ranging from 4.6 to 23 years (median of 11 years). Among 10  
6 articles, five cohorts were conducted primarily in the United States,<sup>11,15,43,44,47</sup> two articles were  
7 done in Asian countries (China and Japan)<sup>7,46</sup> and three cohorts were from European  
8 countries.<sup>5,10,45</sup> The number of participants ranged from 3704 in the EPIC-Norfolk study by  
9 Cooper et al<sup>10</sup> to 91 246 in the Nurses' Health Study II by Muraki et al.<sup>11</sup> Five studies included  
10 both male and female,<sup>5,7,10,15,45</sup> four studies included only female.<sup>43,44,46,47</sup> One article by Muraki et  
11 al reported two independent cohorts, one cohorts included only female, and another only male.<sup>11</sup>  
12 The age of participants ranged from 24 to 79 years. Six papers provided information on fruit and  
13 vegetables intake separately and combined.<sup>5,7,10,43,44,47</sup> two papers provided information on fruit  
14 and vegetables intake separately,<sup>45,46</sup> one paper provided only the combined data,<sup>15</sup> and another  
15 paper provided separate data on fruit.<sup>11</sup> Five papers also included separate data on the intake of  
16 GLV.<sup>5,7,44-46</sup> In most papers intake of fruit and vegetables was divided into fifths.<sup>11,43-47</sup> All studies  
17 provided adjusted risk estimates, results of study quality assessment (score 0-6) showed that most  
18 studies yielded a score of 3 or below (low quality).

### 19 **Fruit intake and risk of T2D**

20 11 comparisons from nine studies reported an association between fruit intake and risk of T2D,  
21 with 22 995 T2D outcomes and 424 677 participants. Overall, fruit intake was inversely  
22 associated with risk (relative risk 0.93, 95% confidence interval 0.88 to 0.99) (fig 2). We saw no  
23 heterogeneity among studies ( $P=0.477$ ,  $I^2=0\%$ ). Additionally, no evidence of substantial  
24 publication bias was observed from the Begg ( $P=0.533$ ) and Egger regression tests ( $P=0.849$ ) (see  
25 supplemental table B in appendix 1). Among 11 comparisons, seven comparisons were eligible for  
26 the dose-response analysis of fruit intake and risk of T2D. Using a restricted cubic splines model,  
27 we found a mild curvilinear association ( $P=0.059$  for non-linearity, fig 3). Dose-response analysis  
28 indicated that a 1 serving/day increment of fruit intake was associated with 6% lower risk of T2D  
29 (relative risk 0.94, 95% confidence interval 0.89 to 1.00,  $I^2=0\%$ ) (see supplemental fig A in  
30 appendix 2).

### 31 **Vegetables intake and risk of T2D**

32 Eight studies reported an association between vegetables intake and risk of T2D, with 20 933  
33 T2D outcomes and 290 927 participants. Using a random effects model summarizing all 9  
34 comparisons, we found no association between vegetables intake and risk (relative risk 0.90, 95%  
35 confidence interval 0.80 to 1.01) (fig 4). There was moderate study heterogeneity ( $P=0.002$ ,  
36  $I^2=66.5\%$ ). However, no evidence of substantial publication bias was observed from the Begg  
37 ( $P=0.602$ ) and Egger regression tests ( $P=0.176$ ) (see supplemental table B in appendix 1). Among  
38 9 comparisons, five comparisons were eligible for the trend estimation. Dose-response analysis  
39 found no association with risk of T2D per 1 serving/day increment of vegetables intake (relative  
40 risk 0.98, 95% confidence interval 0.89 to 1.08,  $I^2=45.8\%$ ) (see supplemental fig B in appendix 2).  
41 No publication bias was observed ( $P=0.117$ ). We found no evidence of a curve linear association  
42 between vegetables intake and risk ( $P=0.671$  for non-linearity, see supplemental fig C in appendix  
43 2).

### 44 **Fruit and vegetables intake and risk of T2D**

45 Information on fruit and vegetables intake and T2D were available in 9 comparisons from seven  
46 prospective studies, totalling 20 672 T2D outcomes and 232 097 participants. Overall, fruit and  
47  
48  
49  
50  
51  
52  
53  
54  
55  
56  
57  
58  
59  
60

1  
2  
3  
4  
5  
6  
7  
8  
9  
10  
11  
12  
13  
14  
15  
16  
17  
18  
19  
20  
21  
22  
23  
24  
25  
26  
27  
28  
29  
30  
31  
32  
33  
34  
35  
36  
37  
38  
39  
40  
41  
42  
43  
44  
45  
46  
47  
48  
49  
50  
51  
52  
53  
54  
55  
56  
57  
58  
59  
60

vegetables intake was not associated with risk (relative risk 0.94, 95% confidence interval 0.86 to 1.03) (see supplemental fig D in appendix 2). We saw no heterogeneity among studies ( $P=0.141$ ,  $I^2=34.6\%$ ). Additionally, no evidence of substantial publication bias was observed from the Begg ( $P=0.348$ ) and Egger regression tests ( $P=0.609$ ) (see supplemental table B in appendix 1). Among 9 comparisons, six comparisons were eligible for the dose-response analysis of fruit and vegetables intake and risk of T2D. We did not find a significant curvilinear association ( $P=0.456$  for non-linearity, see supplemental fig E in appendix 2). Dose-response analysis indicated that a 1 serving/day increment of fruit and vegetables intake (relative risk 0.96, 95% confidence interval 0.86 to 1.07,  $I^2=47.6\%$ ) (see supplemental fig F in appendix 2).

#### **GLV intake and risk of T2D**

7 comparisons from six studies reported an association between GLV intake and risk of T2D, with 19 139 T2D outcomes and 251 235 participants. Overall, GLV intake was inversely associated with risk (relative risk 0.87, 95% confidence interval 0.81 to 0.93) (fig 5). No significant heterogeneity was detected among studies ( $P=0.496$ ,  $I^2=0\%$ ). Additionally, we did not observe evidence of substantial publication bias (the Begg and Egger regression tests,  $P=0.133$  and  $P=0.101$ , respectively) (see supplemental table B in appendix 1). Among 7 comparisons, only three comparisons were eligible for the trend estimation. Using a restricted cubic splines model, we found a significant curvilinear association ( $P=0.036$  for non-linearity, fig 6). Dose-response analysis indicated that a 0.2 serving/day increment of GLV intake was associated with 13% lower risk of T2D (relative risk 0.87, 95% confidence interval 0.76 to 0.99,  $I^2=20.9\%$ ) (see supplemental fig G in appendix 2). No publication bias was observed ( $P=0.282$ ).

#### **Subgroup analyses**

To examine the stability of the primary results, we carried out subgroup analyses (table 1). The association between fruit, vegetables, or fruit and vegetables intake and risk of T2D were similar in subgroup analyses, which were separately defined study quality, length of follow-up, sex, location, number of cases or participants, and whether the different ways in which authors had grouped intake (thirds, quarters, or fifths) affected the results. The summary estimates of relative risks from each category were pooled (see supplemental table B in appendix 1). We paid close attention to the highest versus lowest category. Almost all subgroups that analysed intake of GLV showed a benefit of consuming greater quantities (fig 5). Supplemental table B in appendix 1 also showed significant reductions in risk of T2D events for consumption of fruit, vegetables, or fruit and vegetables combined.

#### **Discussion**

In this meta-analysis dietary intake of fruit, vegetables, and GLV, but not fruit and vegetables combined, were associated with a lower risk of T2D. Dose-response analyses indicated a 6% lower risk of T2D per 1 serving/day increment of fruit intake and 13% lower risk of T2D per 0.2 serving/day increment of GLV intake, but no significant trend for vegetables or fruit and vegetables combined.

#### **Results in relation to other studies**

Over the past decades, extensive prospective studies have reported the association of fruit, vegetables, or fruit and vegetables combined with T2D risk.<sup>5,7,10,11,15,43-47</sup> However, the role of dietary factors in T2D is still controversial. Some of the studies failed to find the association between fruit intake or fruit and vegetables combined and risk of T2D.<sup>8,43</sup> However, Bazzano and

1  
2  
3 colleagues analysed data from 11 different U.S. states with 18 years of follow-up and found that  
4 consumption of fruit was associated with a lower hazard of diabetes, whereas no significant  
5 association for total fruit and vegetables consumption.<sup>47</sup> Similar to previous analysis in the Nurses'  
6 Health Study, the results from three prospective longitudinal cohort studies also supported an  
7 inverse association between fruit intake and risk of T2D.<sup>11</sup> But these studies have the potential for  
8 bias due to measurement error. In addition, two cohort studies have suggested an inverse  
9 association between total fruit and vegetables consumption and risk of T2D.<sup>10,15</sup>

10  
11 A few large cohort studies have found an inverse association between vegetables consumption,  
12 especially GLV and risk of T2D.<sup>10,44-46</sup> These findings all agreed with two meta-analyses.<sup>5,9</sup> But  
13 another systematic review based on five cohort studies suggested that there was no protective  
14 association between vegetables intake and T2D.<sup>8</sup>

15  
16 Several plausible biological mechanisms have been proposed to explain abovementioned  
17 association. Fruit and vegetables are rich in fibre,<sup>48</sup> which has been shown to improve insulin  
18 sensitivity and insulin secretion to overcome insulin resistance.<sup>49</sup> However, meta-analyses showed  
19 that fruit and vegetables fibre is inconsistently associated with the risk of T2D.<sup>50</sup> On the other  
20 hand, it may contribute to a decreased incidence of T2D through their low energy density and  
21 glycemic load, and high micronutrient content.<sup>51</sup> In particular, GLV are rich in bioactive  
22 phytochemicals (such as vitamin C and carotenoids), which are known for their antioxidant  
23 properties.<sup>52-54</sup> Antioxidants in fruit and vegetables have been hypothesized to improve insulin  
24 sensitivity and protect against diabetes in several supplementation trials.<sup>55,56</sup> In addition, it also  
25 might reduce the risk of T2D due to the supply of magnesium (Mg), a recent meta-analysis  
26 detected Mg intake to be inversely associated with the risk of T2D.<sup>57</sup> Taking this evidence into  
27 consideration, it appears that the beneficial effects of vegetables, particularly GLV consumption  
28 on the risk of T2D can be mainly explained by antioxidant vitamins and magnesium. The inverse  
29 association may be also mediated through weight gain or obesity which is an established risk  
30 factor for type 2 diabetes. Fruits are low in energy, which would promote the feeling of fullness  
31 and prevent over consumption of energy-dense foods, and resulting in weight loss.<sup>54</sup> Further  
32 investigation is warranted to understand the mechanisms involved in the proposed relation  
33 between fruit, vegetables, or GLV and risk of T2D.

### 34 35 36 37 38 39 **Exploration of heterogeneity**

40 Heterogeneity between studies was found, which did not alter much in the subgroup analyses.  
41 There are differences in types of vegetable consumed between Asian (such as China) and  
42 Non-Asian populations. Therefore, within the subgroup analysis we examined location as a  
43 possible source of heterogeneity. As traditional Chinese diets are high in vegetables (such as GLV  
44 and cruciferous vegetables), unsurprisingly, vegetables (including GLV) intake were greater in  
45 China than the US or Europe. We also examined study quality, length of follow-up, sex, number of  
46 cases or participants, and whether the different ways in which authors had grouped intake (thirds,  
47 quarters, or fifths) as possible sources of heterogeneity, these did not show any significant  
48 heterogeneity between studies. Although the subgroup analysis could not explain the level of  
49 heterogeneity, in interpreting the results, several differences between the studies are worth  
50 discussing.

51  
52 Assessment methods of fruit, vegetables, or fruit and vegetables combined consumption differed  
53 between the studies. Most epidemiological studies used the food frequency questionnaires (FFQs)  
54 to assess quantity of fruit, vegetables, or fruit and vegetables combined intake.<sup>7,10,11,43,44,46,47</sup> It is  
55  
56  
57  
58  
59  
60



1  
2  
3 less suitable for the assessment of absolute intake, which they tend to overestimate.<sup>58,59</sup> However,  
4 two studies collected data via a single 24 hour recall and dietary history interviews,  
5 respectively.<sup>15,45</sup> These measurements may underestimate true associations between fruit,  
6 vegetables, or fruit and vegetables combined consumption and risk of T2D. In addition,  
7 calculations of daily consumption were differed (such as servings per week, servings per day, or  
8 grams per day). Although we standardized primary data using a standard portion size of 106g,  
9 conclusions should be interpreted with caution. Another possible explanation for the differences  
10 between the studies might be the classification of food groups. GLVs' criteria was inconsistent:  
11 three studies included spinach and lettuce; one included spinach and greens; others did not provide  
12 specific description. If they were included with an uniform definition of each groups, the  
13 associations might differ.

### 14 **Strengths and limitations**

15 Compared with the previous meta-analyses,<sup>5,8,9</sup> our study has several strengths. To our knowledge,  
16 this is the largest systematic review and meta-analysis on the intake of fruit and vegetables and  
17 risk of T2D. In addition, to examine the shape of these possible associations, we investigated a  
18 dose-response relation between fruit, vegetables, fruit and vegetables combined consumption and  
19 risk of T2D. Therefore, the results should be more reliable.

20 In interpreting the results, several limitations of this meta-analysis should also be acknowledged.  
21 Firstly, although in the multivariable analysis we considered a multitude of lifestyle and dietary  
22 factors. The possibility of residual confounding or confounding by unmeasured factors, which  
23 cannot be ruled out in any observational study, must be acknowledged. Second, we cannot exclude  
24 the possibility of recall bias in the assessments of diet based on the FFQs. However, the  
25 prospective study design and exclusion of participants with chronic diseases at baseline should  
26 minimize such bias. Third, the noticeable limitation of our study was the potential for bias due to  
27 inevitable measurement error, especially for individual with lower consumption levels. We  
28 attempted to reduce measurement error in adjusting for energy intake and using of cumulatively  
29 averaged intake levels. Fourth, because we had no source of information other than questionnaire  
30 for the identification of T2D, we might have underestimated the incidence of T2D. In addition,  
31 subclinical diseases at baseline might have distorted our risk estimate to some extent. Finally, the  
32 possible limitation is due to language bias. We attempted to minimize this bias by searching major  
33 electronic databases with no language restriction. However, several articles published in  
34 non-English languages might not appear in international journal databases, and could be omitted  
35 by our searches.<sup>60</sup>

### 36 **Conclusions**

37 In summary, our meta-analysis suggests that higher fruit or GLV intake is associated with a  
38 significantly reduced risk of T2D. In addition, the dose-response relations also indicate that  
39 relatively high fruit or GLV may still decrease risk of T2D. Further evidence from preferably  
40 randomized controlled studies should explore what kind of fruit or GLV can reduce the risk of  
41 T2D.  
42  
43  
44  
45  
46  
47  
48  
49  
50  
51  
52  
53  
54  
55  
56  
57  
58  
59  
60

Contributors: ML and ZT conceived and designed the study. ML and YF searched the databases and checked them according to the eligible criteria and exclusion criteria. ZT helped develop search strategies. XZ and WH extract quantitative data. YF, XZ, and WH analyzed the data. ML wrote the draft of the paper. All authors contributed to writing, reviewing, or revising the paper. ZT is the guarantor.

Funding: This work was not funded by any foundation or program.

Competing interests: All authors have completed the ICMJE uniform disclosure form at [www.icmje.org/coi\\_disclosure.pdf](http://www.icmje.org/coi_disclosure.pdf) (available on request from the corresponding author) and declare: no support from any organization for the submitted work; no financial relationships with any organizations that might have an interest in the submitted work in the previous three years; no other relationships or activities that could appear to have influenced the submitted work.

Ethical approval: Not required.

Data sharing: No additional data available.

### **Figures Information**

**Figure 1. Process of literature search and study selection.**

(TIFF)

**Figure 2. Random effects analysis of fully adjusted studies for highest versus lowest intake of fruit and risk of type 2 diabetes.**

(TIFF)

**Figure 3. Dose-response analyses of fruit intake and risk of type 2 diabetes.**

(TIFF)

**Figure 4. Random effects analysis of fully adjusted studies for highest versus lowest intake of vegetables and risk of type 2 diabetes.**

(TIFF)

**Figure 5. Random effects analysis of fully adjusted studies for highest versus lowest intake of green leafy vegetables and risk of type 2 diabetes.**

(TIFF)

**Figure 6. Dose-response analyses of green leafy vegetables intake and risk of type 2 diabetes.**

(TIFF)

### **Appendix figure information**

**Supplemental fig A. Forest plot of fruit intake and risk of type 2 diabetes.**

(TIFF)

**Supplemental fig B. Forest plot of vegetables intake and risk of type 2 diabetes.**

(TIFF)

1  
2  
3  
4 **Supplemental fig C. Dose-response analyses of vegetables intake and risk of type 2 diabetes.**  
5 **(TIFF)**  
6  
7

8 **Supplemental fig D. Random effects analysis of fully adjusted studies for highest versus**  
9 **lowest intake of fruit and vegetables and risk of type 2 diabetes.**  
10 **(TIFF)**  
11

12 **Supplemental fig E. Dose-response analyses of fruit and vegetables intake and risk of type 2**  
13 **diabetes.**  
14 **(TIFF)**  
15

16 **Supplemental fig F. Forest plot of fruit and vegetables intake and risk of type 2 diabetes.**  
17 **(TIFF)**  
18

19 **Supplemental fig G. Forest plot of green leafy vegetables intake and risk of type 2 diabetes.**  
20 **(TIFF)**  
21

- 22  
23  
24  
25  
26  
27 1 Shaw JE, Sicree RA, Zimmet PZ. Global estimates of the prevalence of diabetes for 2010 and  
28 2030. *Diabetes Res Clin Pract* 2010;87:4-14.  
29 2 Jonsson B. Revealing the cost of Type II diabetes in Europe. *Diabetologia* 2002;45:S5-12.  
30 3 Zhang P, Zhang X, Brown J, Vistisen D, Sicree R, Shaw J, et al. Global healthcare expenditure  
31 on diabetes for 2010 and 2030. *Diabetes Res Clin Pract* 2010;87:293-301.  
32 4 Gillies CL, Abrams KR, Lambert PC, Cooper NJ, Sutton AJ, Hsu RT, et al. Pharmacological and  
33 lifestyle interventions to prevent or delay type 2 diabetes in people with impaired glucose  
34 tolerance: systematic review and meta-analysis. *BMJ* 2007;334:299.  
35 5 Cooper AJ, Forouhi NG, Ye Z, Buijsse B, Arriola L, Balkau B, et al. Fruit and vegetable intake  
36 and type 2 diabetes: EPIC-InterAct prospective study and meta-analysis. *Eur J Clin Nutr*  
37 2012;66:1082-92.  
38 6 World Health Organization/UN Food and Agriculture Organization. *Diet, Nutrition and the*  
39 *Prevention of Chronic Diseases: Report of a Joint FAO/WHO Expert Consultation*. Geneva,  
40 World Health Org., 2003 (Tech. Rep. Ser., no. 916).  
41 7 Kurotani K, Nanri A, Goto A, Mizoue T, Noda M, Kato M, et al. Vegetable and fruit intake and  
42 risk of type 2 diabetes: Japan Public Health Center-based Prospective Study. *Br J Nutr*  
43 2013;109:709-17.  
44 8 Hamer M, Chida Y. Intake of fruit, vegetables, and antioxidants and risk of type 2 diabetes:  
45 systematic review and meta-analysis. *J Hypertens* 2007;25:2361-9.  
46 9 Carter P, Gray LJ, Troughton J, Khunti K, Davies MJ. Fruit and vegetable intake and incidence  
47 of type 2 diabetes mellitus: systematic review and meta-analysis. *BMJ* 2010;341:c4229.  
48 10 Cooper AJ, Sharp SJ, Lentjes MA, Luben RN, Khaw KT, Wareham NJ, et al. A prospective  
49 study of the association between quantity and variety of fruit and vegetable intake and incident  
50 type 2 diabetes. *Diabetes Care* 2012;35:1293-300.  
51 11 Muraki I, Imamura F, Manson JE, Hu FB, Willett WC, van Dam RM, et al. Fruit consumption  
52  
53  
54  
55  
56  
57  
58  
59  
60



- and risk of type 2 diabetes: results from three prospective longitudinal cohort studies. *BMJ* 2013;347:f5001.
- 12 Stroup DF, Berlin JA, Morton SC, Olkin I, Williamson GD, Rennie D, et al. Meta-analysis of observational studies in epidemiology: a proposal for reporting. Meta-analysis Of Observational Studies in Epidemiology (MOOSE) group. *JAMA* 2000;283:2008-12.
- 13 Wong WC, Cheung CS, Hart GJ. Development of a quality assessment tool for systematic reviews of observational studies (QATSO) of HIV prevalence in men having sex with men and associated risk behaviours. *Emerg Themes Epidemiol* 2008;5:23.
- 14 von EE, Altman DG, Egger M, Pocock SJ, Gøtzsche PC, Vandenbroucke JP. The Strengthening the Reporting of Observational Studies in Epidemiology (STROBE) statement: guidelines for reporting observational studies. *Prev Med* 2007;45:247-51.
- 15 Ford ES, Mokdad AH. Fruit and vegetable consumption and diabetes mellitus incidence among U.S. adults. *Prev Med* 2001;32:33-9.
- 16 DerSimonian R, Laird N. Meta-analysis in clinical trials. *Control Clin Trials* 1986;7:177-88.
- 17 Dauchet L, Amouyel P, Hercberg S, Dallongeville J. Fruit and vegetable consumption and risk of coronary heart disease: a meta-analysis of cohort studies. *J Nutr* 2006;136:2588-93.
- 18 Greenland S, Longnecker MP. Methods for trend estimation from summarized dose-response data, with applications to meta-analysis. *Am J Epidemiol* 1992;135:1301-9.
- 19 Orsini N, Bellocco R, Greenland S. Generalized least squares for trend estimation of summarized dose-response data. *Stata Journal* 2006;6:40-57.
- 20 Orsini N, Li R, Wolk A, Khudyakov P, Spiegelman D. Meta-analysis for linear and nonlinear dose-response relations: examples, an evaluation of approximations, and software. *Am J Epidemiol* 2012;175:66-73.
- 21 Harrell FE Jr, Lee KL, Pollock BG. Regression models in clinical studies: determining relationships between predictors and response. *J Natl Cancer Inst* 1988;80:1198-202.
- 22 Higgins JP, Thompson SG, Deeks JJ, Altman DG. Measuring inconsistency in meta-analyses. *BMJ* 2003;327:557-60.
- 23 Begg CB, Mazumdar M. Operating characteristics of a rank correlation test for publication bias. *Biometrics* 1994;50:1088-101.
- 24 Egger M, Davey SG, Schneider M, Minder C. Bias in meta-analysis detected by a simple, graphical test. *BMJ* 1997;315:629-34.
- 25 Peters JL, Sutton AJ, Jones DR, Abrams KR, Rushton L. Contour-enhanced meta-analysis funnel plots help distinguish publication bias from other causes of asymmetry. *J Clin Epidemiol* 2008;61:991-6.
- 26 Bauer F, Beulens JW, van der A DL, Wijnenga C, Grobbee DE, Spijkerman AM, et al. Dietary patterns and the risk of type 2 diabetes in overweight and obese individuals. *Eur J Nutr* 2013;52:1127-34.
- 27 Eshak ES, Iso H, Mizoue T, Inoue M, Noda M, Tsugane S. Soft drink, 100% fruit juice, and vegetable juice intakes and risk of diabetes mellitus. *Clin Nutr* 2013;32:300-8.
- 28 von RA, Feller S, Bergmann MM, Boeing H. Diet and risk of chronic diseases: results from the first 8 years of follow-up in the EPIC-Potsdam study. *Eur J Clin Nutr* 2013;67:412-9.
- 29 Yu R, Woo J, Chan R, Sham A, Ho S, Tso A, et al. Relationship between dietary intake and the development of type 2 diabetes in a Chinese population: the Hong Kong Dietary Survey. *Public Health Nutr* 2011;14:1133-41.

- 1  
2  
3 30 Morimoto A, Ohno Y, Tatsumi Y, Mizuno S, Watanabe S. Effects of healthy dietary pattern and  
4 other lifestyle factors on incidence of diabetes in a rural Japanese population. *Asia Pac J Clin*  
5 *Nutr* 2012;21:601-8.  
6  
7 31 Martinez-Gonzalez MA, de la Fuente-Arrillaga C, Lopez-Del-Burgo C, Vazquez-Ruiz Z,  
8 Benito S, Ruiz-Canela M. Low consumption of fruit and vegetables and risk of chronic disease:  
9 a review of the epidemiological evidence and temporal trends among Spanish graduates.  
10 *Public Health Nutr* 2011;14:2309-15.  
11  
12 32 Esposito K, Kastorini CM, Panagiotakos DB, Giugliano D. Prevention of type 2 diabetes by  
13 dietary patterns: a systematic review of prospective studies and meta-analysis. *Metab Syndr*  
14 *Relat Disord* 2010;8:471-6.  
15  
16 33 Lodefalk M, Aman J. Food habits, energy and nutrient intake in adolescents with Type 1  
17 diabetes mellitus. *Diabet Med* 2006;23:1225-32.  
18  
19 34 Zhu Y, Zhang Y, Ling W, Feng D, Wei X, Yang C, et al. Fruit consumption is associated with  
20 lower carotid intima-media thickness and C-reactive protein levels in patients with type 2  
21 diabetes mellitus. *J Am Diet Assoc* 2011;111:1536-42.  
22  
23 35 Hosseinpour-Niazi S, Mirmiran P, Sohrab G, Hosseini-Esfahani F, Azizi F. Inverse association  
24 between fruit, legume, and cereal fiber and the risk of metabolic syndrome: Tehran Lipid and  
25 Glucose Study. *Diabetes Res Clin Pract* 2011;94:276-83.  
26  
27 36 Odegaard AO, Koh WP, Arakawa K, Yu MC, Pereira MA. Soft drink and juice consumption  
28 and risk of physician-diagnosed incident type 2 diabetes: the Singapore Chinese Health Study.  
29 *Am J Epidemiol* 2010;171:701-8.  
30  
31 37 Hodge AM, English DR, O'Dea K, Giles GG. Dietary patterns and diabetes incidence in the  
32 Melbourne Collaborative Cohort Study. *Am J Epidemiol* 2007;165:603-10.  
33  
34 38 Cai H, Shu XO, Gao YT, Li H, Yang G, Zheng W. A prospective study of dietary patterns and  
35 mortality in Chinese women. *Epidemiology* 2007;18:393-401.  
36  
37 39 Sartorelli DS, Cardoso MA. [Association between dietary carbohydrates and type 2 diabetes  
38 mellitus: epidemiological evidence]. *Arq Bras Endocrinol Metabol* 2006;50:415-26.  
39  
40 40 Erber E, Hopping BN, Grandinetti A, Park SY, Kolonel LN, Maskarinec G. Dietary patterns  
41 and risk for diabetes: the multiethnic cohort. *Diabetes Care* 2010;33:532-8.  
42  
43 41 Sluijs I, Beulens JW, van der A DL, Spijkerman AM, Grobbee DE, van der Schouw YT.  
44 Dietary intake of total, animal, and vegetable protein and risk of type 2 diabetes in the  
45 European Prospective Investigation into Cancer and Nutrition (EPIC)-NL study. *Diabetes Care*  
46 2010;33:43-8.  
47  
48 42 Liese AD, Weis KE, Schulz M, Tooze JA. Food intake patterns associated with incident type 2  
49 diabetes: the Insulin Resistance Atherosclerosis Study. *Diabetes Care* 2009;32:263-8.  
50  
51 43 Meyer KA, Kushi LH, Jacobs DR Jr, Slavin J, Sellers TA, Folsom AR. Carbohydrates, dietary  
52 fiber, and incident type 2 diabetes in older women. *Am J Clin Nutr* 2000;71:921-30.  
53  
54 44 Liu S, Serdula M, Janket SJ, Cook NR, Sesso HD, Willett WC, et al. A prospective study of  
55 fruit and vegetable intake and the risk of type 2 diabetes in women. *Diabetes Care*  
56 2004;27:2993-6.  
57  
58 45 Montonen J, Jarvinen R, Heliövaara M, Reunanen A, Aromaa A, Knekt P. Food consumption  
59 and the incidence of type II diabetes mellitus. *Eur J Clin Nutr* 2005;59:441-8.  
60  
61 46 Villegas R, Shu XO, Gao YT, Yang G, Elasy T, Li H, et al. Vegetable but not fruit consumption  
62 reduces the risk of type 2 diabetes in Chinese women. *J Nutr* 2008;138:574-80.

- 1  
2  
3 47 Bazzano LA, Li TY, Joshipura KJ, Hu FB. Intake of fruit, vegetables, and fruit juices and risk  
4 of diabetes in women. *Diabetes Care* 2008;31:1311-7.  
5  
6 48 McKee LH, Latner TA. Underutilized sources of dietary fiber: a review. *Plant Foods Hum Nutr*  
7 2000;55:285-304.  
8  
9 49 Liese AD, Roach AK, Sparks KC, Marquart L, D'Agostino RB Jr, Mayer-Davis EJ.  
10 Whole-grain intake and insulin sensitivity: the Insulin Resistance Atherosclerosis Study. *Am J*  
11 *Clin Nutr* 2003;78:965-71.  
12  
13 50 Schulze MB, Schulz M, Heidemann C, Schienkiewitz A, Hoffmann K, Boeing H. Fiber and  
14 magnesium intake and incidence of type 2 diabetes: a prospective study and meta-analysis.  
15 *Arch Intern Med* 2007;167:956-65.  
16  
17 51 Jenkins DJ, Wolever TM, Buckley G, Lam KY, Giudici S, Kalmusky J, et al.  
18 Low-glycemic-index starchy foods in the diabetic diet. *Am J Clin Nutr* 1988;48:248-54.  
19  
20 52 Tarwadi K, Agte V. Potential of commonly consumed green leafy vegetables for their  
21 antioxidant capacity and its linkage with the micronutrient profile. *Int J Food Sci Nutr*  
22 2003;54:417-25.  
23  
24 53 Hozawa A, Jacobs DR Jr, Steffes MW, Gross MD, Steffen LM, Lee DH. Associations of serum  
25 carotenoid concentrations with the development of diabetes and with insulin concentration:  
26 interaction with smoking: the Coronary Artery Risk Development in Young Adults (CARDIA)  
27 Study. *Am J Epidemiol* 2006;163:929-37.  
28  
29 54 Harding AH, Wareham NJ, Bingham SA, Khaw K, Luben R, Welch A, et al. Plasma vitamin C  
30 level, fruit and vegetable consumption, and the risk of new-onset type 2 diabetes mellitus: the  
31 European prospective investigation of cancer--Norfolk prospective study. *Arch Intern Med*  
32 2008;168:1493-9.  
33  
34 55 Liu S, Ajani U, Chae C, Hennekens C, Buring JE, Manson JE. Long-term beta-carotene  
35 supplementation and risk of type 2 diabetes mellitus: a randomized controlled trial. *JAMA*  
36 1999;282:1073-5.  
37  
38 56 Ceriello A, Motz E. Is oxidative stress the pathogenic mechanism underlying insulin resistance,  
39 diabetes, and cardiovascular disease? The common soil hypothesis revisited. *Arterioscler*  
40 *Thromb Vasc Biol* 2004;24:816-23.  
41  
42 57 Larsson SC, Wolk A. Magnesium intake and risk of type 2 diabetes: a meta-analysis. *J Intern*  
43 *Med* 2007;262:208-14.  
44  
45 58 Feskanich D, Rimm EB, Giovannucci EL, Colditz GA, Stampfer MJ, Litin LB, et al.  
46 Reproducibility and validity of food intake measurements from a semiquantitative food  
47 frequency questionnaire. *J Am Diet Assoc* 1993;93:790-6.  
48  
49 59 Bingham SA, Welch AA, McTaggart A, Mulligan AA, Runswick SA, Luben R, et al.  
50 Nutritional methods in the European Prospective Investigation of Cancer in Norfolk. *Public*  
51 *Health Nutr* 2001;4:847-58.  
52  
53 60 Li M, Hou W, Zhang X, Hu L, Tang Z. Hyperuricemia and risk of stroke: a systematic review  
54 and meta-analysis of prospective studies. *Atherosclerosis* 2014;232:265-70.  
55  
56  
57  
58  
59  
60

1  
2  
3  
4  
5  
6  
7  
8  
9  
10  
11  
12  
13  
14  
15  
16  
17  
18  
19  
20  
21  
22  
23  
24  
25  
26  
27  
28  
29  
30  
31  
32  
33  
34  
35  
36  
37  
38  
39  
40  
41  
42  
43  
44  
45  
46  
47  
48  
49  
50  
51  
52  
53  
54  
55  
56  
57  
58  
59  
60

For peer review only

**Table 1. Subgroup analyses to investigate differences between studies included in meta-analysis (highest versus lowest category)**

| Variables                     | Fruit only |                     |         | Vegetables only |                     |         | Fruit and vegetables |                     |         | Green leafy vegetables |                     |         |
|-------------------------------|------------|---------------------|---------|-----------------|---------------------|---------|----------------------|---------------------|---------|------------------------|---------------------|---------|
|                               | No         | Pooled RR (95% CI)  | P value | No              | Pooled RR (95% CI)  | P value | No                   | Pooled RR (95% CI)  | P value | No                     | Pooled RR (95% CI)  | P value |
| Location                      |            |                     |         |                 |                     |         |                      |                     |         |                        |                     |         |
| Non-Asia                      | 8          | 0.93 (0.87 to 1.00) | 0.049   | 6               | 0.96 (0.87 to 1.06) | 0.397   | 7                    | 0.94 (0.84 to 1.04) | 0.223   | 4                      | 0.89 (0.81 to 0.97) | 0.012   |
| Asia                          | 3          | 0.96 (0.82 to 1.12) | 0.584   | 3               | 0.77 (0.60 to 0.98) | 0.032   | 2                    | 0.97 (0.75 to 1.25) | 0.827   | 3                      | 0.80 (0.69 to 0.93) | 0.004   |
| Quality                       |            |                     |         |                 |                     |         |                      |                     |         |                        |                     |         |
| High ( $\geq 4$ )             | 4          | 0.92 (0.86 to 1.00) | 0.045   | 2               | 0.83 (0.52 to 1.33) | 0.448   | 1                    | 1.04 (0.87 to 1.25) | 0.671   | 2                      | 0.86 (0.76 to 0.98) | 0.024   |
| Low ( $< 4$ )                 | 7          | 0.94 (0.85 to 1.04) | 0.240   | 7               | 0.93 (0.84 to 1.02) | 0.109   | 8                    | 0.93 (0.84 to 1.02) | 0.138   | 5                      | 0.86 (0.77 to 0.97) | 0.010   |
| Duration of follow-up (years) |            |                     |         |                 |                     |         |                      |                     |         |                        |                     |         |
| $\geq 10$                     | 5          | 0.90 (0.83 to 0.97) | 0.006   | 4               | 0.91 (0.79 to 1.05) | 0.190   | 5                    | 0.89 (0.77 to 1.02) | 0.098   | 3                      | 0.85 (0.75 to 0.97) | 0.014   |
| $< 10$                        | 6          | 0.98 (0.90 to 1.07) | 0.654   | 5               | 0.89 (0.72 to 1.10) | 0.296   | 4                    | 1.03 (0.91 to 1.16) | 0.674   | 4                      | 0.87 (0.78 to 0.97) | 0.013   |
| Sex                           |            |                     |         |                 |                     |         |                      |                     |         |                        |                     |         |
| M and F                       | 5          | 0.88 (0.79 to 0.98) | 0.022   | 5               | 0.89 (0.81 to 0.97) | 0.010   | 6                    | 0.87 (0.77 to 0.98) | 0.026   | 4                      | 0.80 (0.69 to 0.92) | 0.002   |
| F only                        | 5          | 0.95 (0.88 to 1.02) | 0.168   | 4               | 0.94 (0.77 to 1.15) | 0.544   | 3                    | 1.02 (0.94 to 1.11) | 0.610   | 3                      | 0.89 (0.81 to 0.98) | 0.014   |
| M only                        | 1          | 0.99 (0.82 to 1.19) | 0.916   | 0               | -                   | -       | 0                    | -                   | -       | 0                      | -                   | -       |
| Fractions of distribution     |            |                     |         |                 |                     |         |                      |                     |         |                        |                     |         |
| Thirds                        | 1          | 0.91 (0.71 to 1.16) | 0.451   | 1               | 0.94 (0.84 to 1.05) | 0.277   | 1                    | 0.90 (0.80 to 1.01) | 0.076   | 1                      | 0.84 (0.65 to 1.08) | 0.170   |
| Quarters                      | 3          | 0.92 (0.81 to 1.04) | 0.193   | 3               | 0.77 (0.60 to 0.98) | 0.032   | 2                    | 0.97 (0.75 to 1.25) | 0.827   | 3                      | 0.80 (0.69 to 0.93) | 0.004   |
| Fifths                        | 7          | 0.94 (0.87 to 1.02) | 0.144   | 5               | 0.96 (0.84 to 1.09) | 0.499   | 6                    | 0.94 (0.82 to 1.08) | 0.385   | 3                      | 0.89 (0.78 to 1.01) | 0.062   |
| No of participants            |            |                     |         |                 |                     |         |                      |                     |         |                        |                     |         |
| $\geq 50000$                  | 3          | 0.91 (0.84 to 0.99) | 0.032   | 2               | 0.83 (0.52 to 1.33) | 0.448   | 1                    | 1.01 (0.91 to 1.13) | 0.858   | 2                      | 0.86 (0.76 to 0.98) | 0.024   |
| $< 50000$                     | 8          | 0.95 (0.87 to 1.04) | 0.237   | 7               | 0.93 (0.84 to 1.02) | 0.109   | 8                    | 0.92 (0.83 to 1.03) | 0.146   | 5                      | 0.86 (0.77 to 0.97) | 0.010   |
| No of cases                   |            |                     |         |                 |                     |         |                      |                     |         |                        |                     |         |
| $\geq 1000$                   | 5          | 0.95 (0.88 to 1.03) | 0.233   | 4               | 1.01 (0.94 to 1.08) | 0.810   | 6                    | 0.96 (0.86 to 1.07) | 0.456   | 3                      | 0.91 (0.84 to 0.98) | 0.018   |
| $< 1000$                      | 6          | 0.91 (0.82 to 1.00) | 0.042   | 5               | 0.75 (0.66 to 0.85) | 0.000   | 3                    | 0.87 (0.73 to 1.04) | 0.119   | 4                      | 0.78 (0.68 to 0.89) | 0.000   |

M=male, F=female, RR=relative risk.

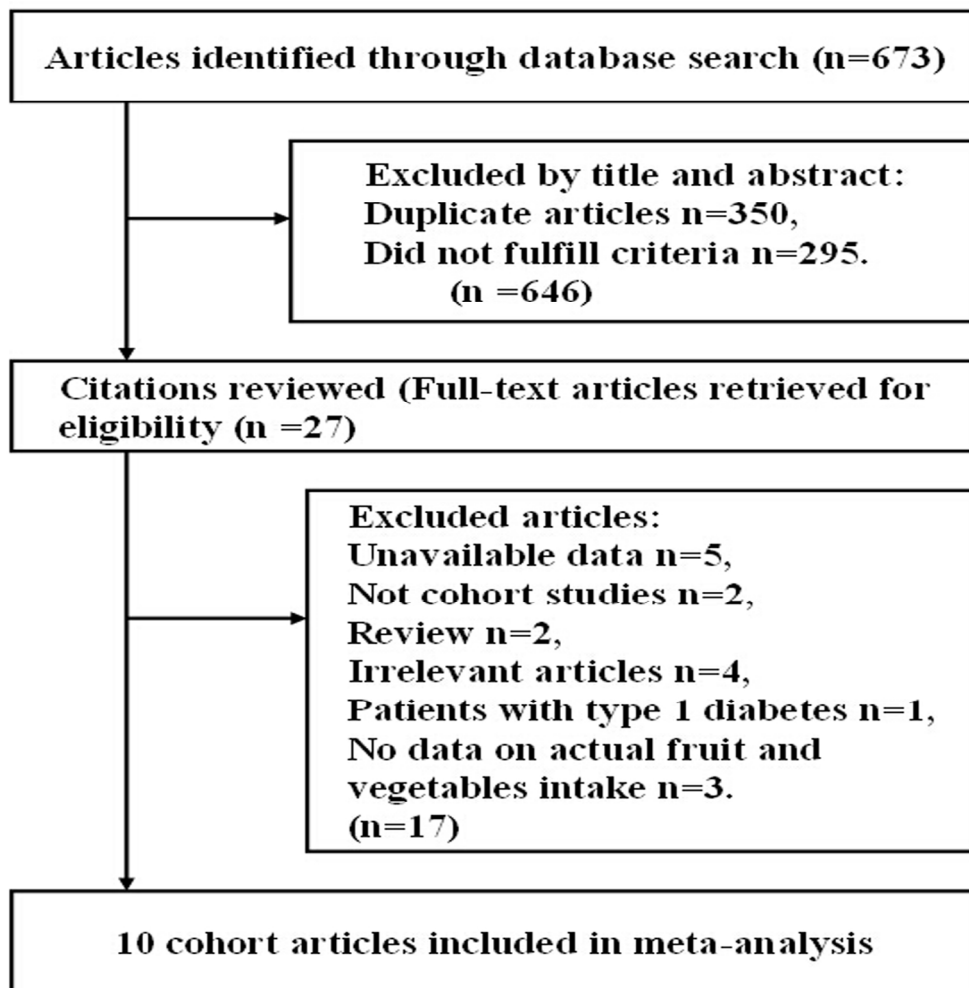

150x150mm (300 x 300 DPI)

BMJ

1  
2  
3  
4  
5  
6  
7  
8  
9  
10  
11  
12  
13  
14  
15  
16  
17  
18  
19  
20  
21  
22  
23  
24  
25  
26  
27  
28  
29  
30  
31  
32  
33  
34  
35  
36  
37  
38  
39  
40  
41  
42  
43  
44  
45  
46  
47  
48  
49  
50  
51  
52  
53  
54  
55  
56  
57  
58  
59  
60

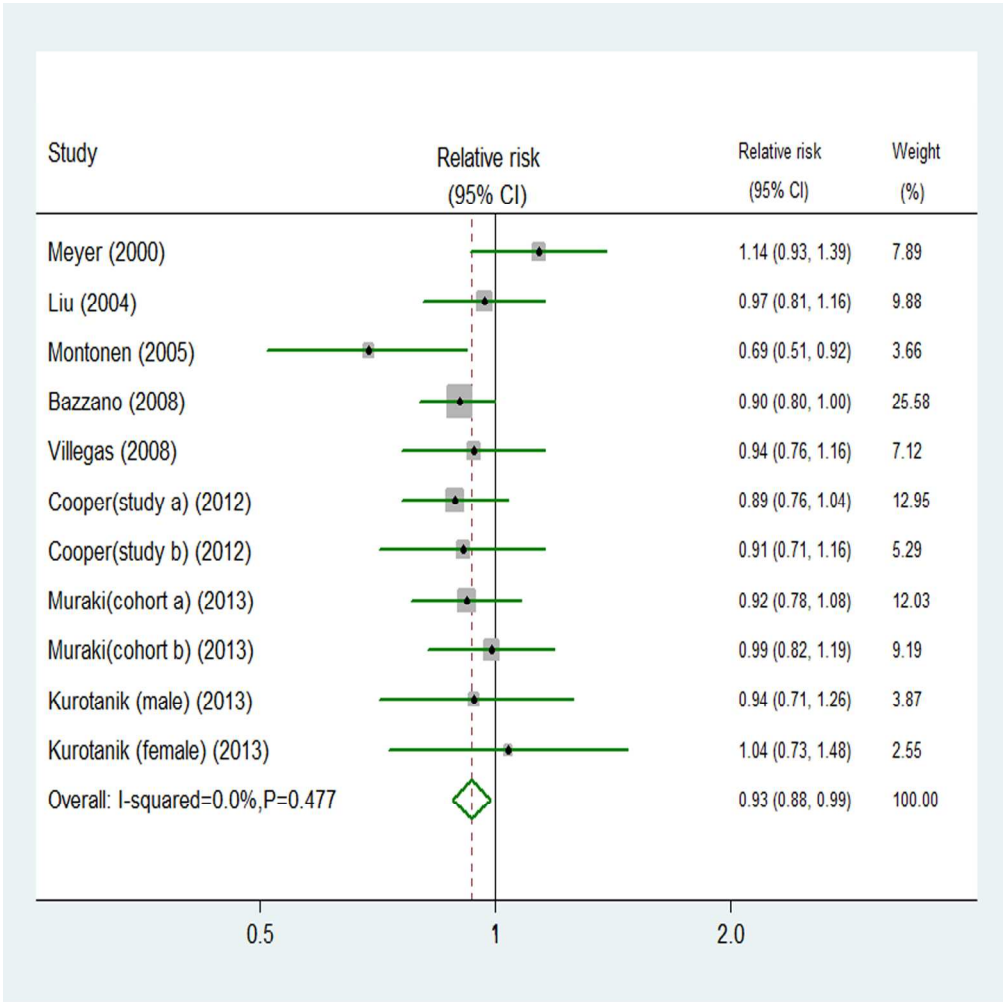

172x172mm (300 x 300 DPI)

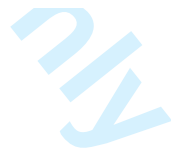

1  
2  
3  
4  
5  
6  
7  
8  
9  
10  
11  
12  
13  
14  
15  
16  
17  
18  
19  
20  
21  
22  
23  
24  
25  
26  
27  
28  
29  
30  
31  
32  
33  
34  
35  
36  
37  
38  
39  
40  
41  
42  
43  
44  
45  
46  
47  
48  
49  
50  
51  
52  
53  
54  
55  
56  
57  
58  
59  
60

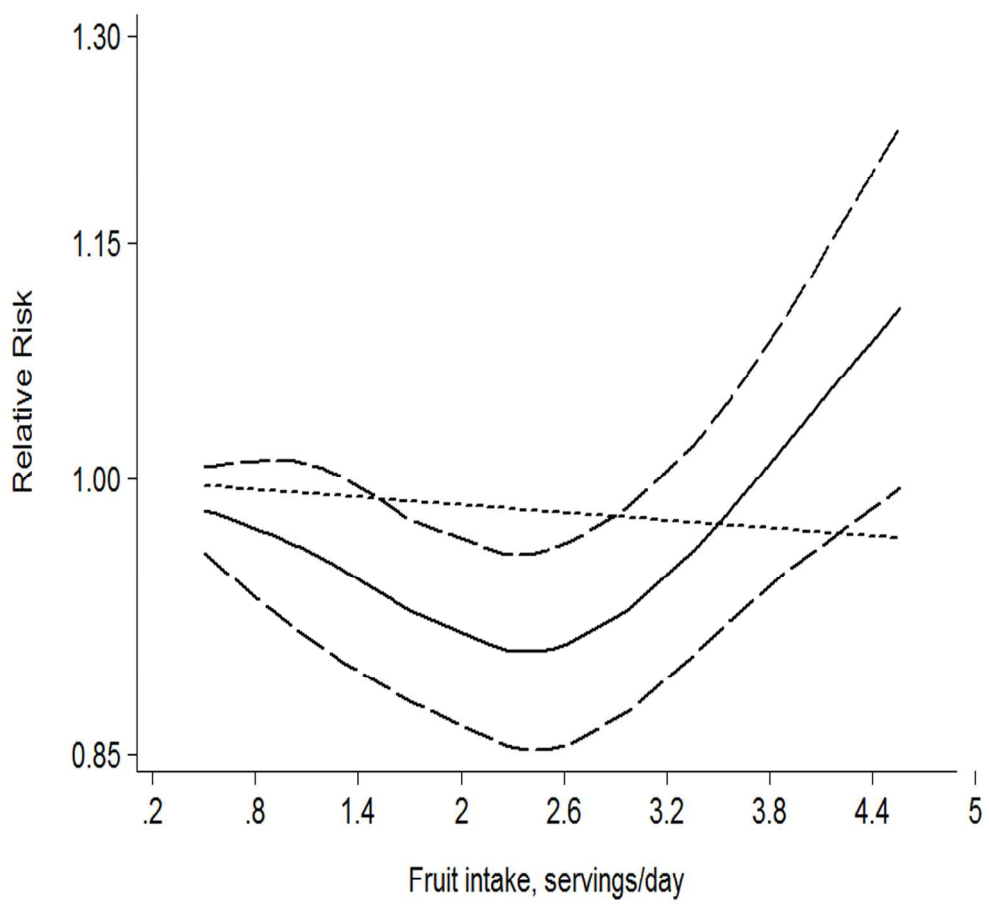

172x172mm (300 x 300 DPI)

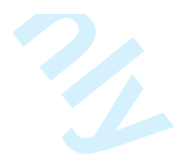



1  
2  
3  
4  
5  
6  
7  
8  
9  
10  
11  
12  
13  
14  
15  
16  
17  
18  
19  
20  
21  
22  
23  
24  
25  
26  
27  
28  
29  
30  
31  
32  
33  
34  
35  
36  
37  
38  
39  
40  
41  
42  
43  
44  
45  
46  
47  
48  
49  
50  
51  
52  
53  
54  
55  
56  
57  
58  
59  
60

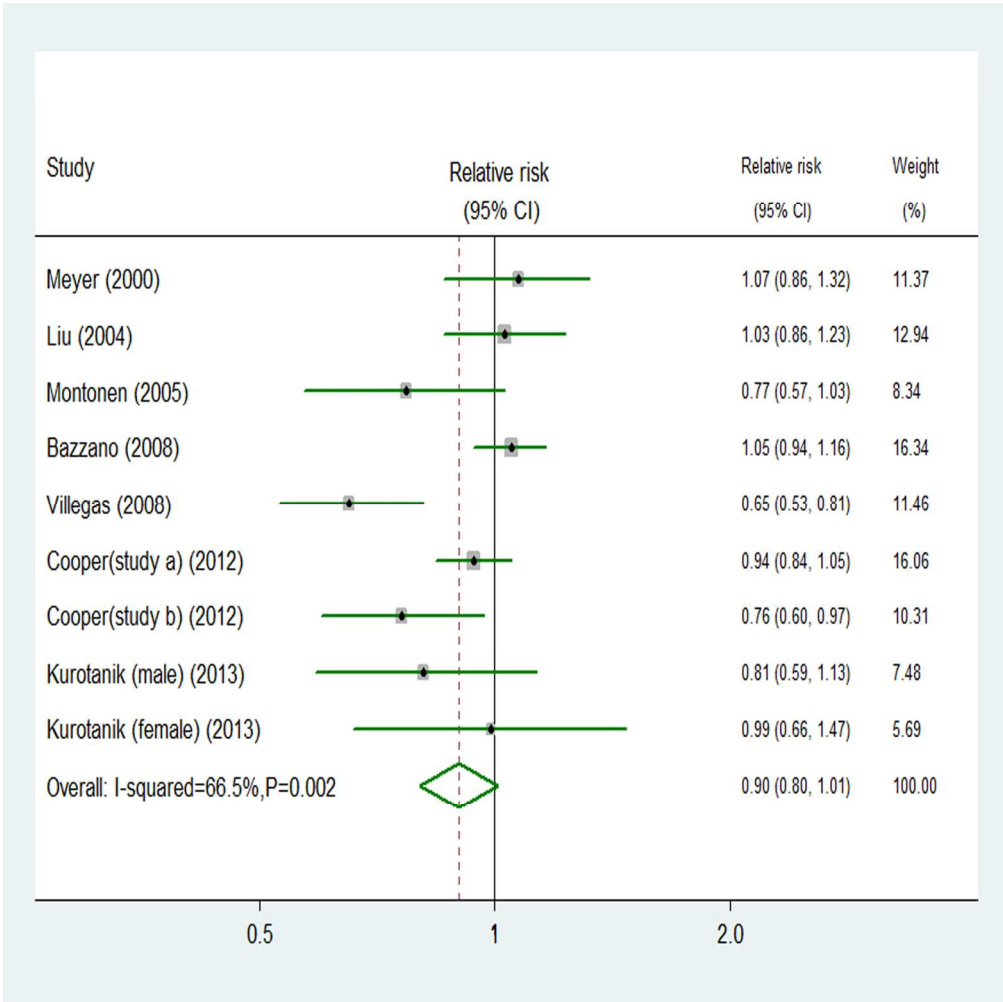

172x172mm (300 x 300 DPI)

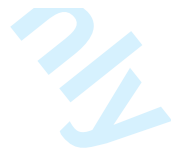

1  
2  
3  
4  
5  
6  
7  
8  
9  
10  
11  
12  
13  
14  
15  
16  
17  
18  
19  
20  
21  
22  
23  
24  
25  
26  
27  
28  
29  
30  
31  
32  
33  
34  
35  
36  
37  
38  
39  
40  
41  
42  
43  
44  
45  
46  
47  
48  
49  
50  
51  
52  
53  
54  
55  
56  
57  
58  
59  
60

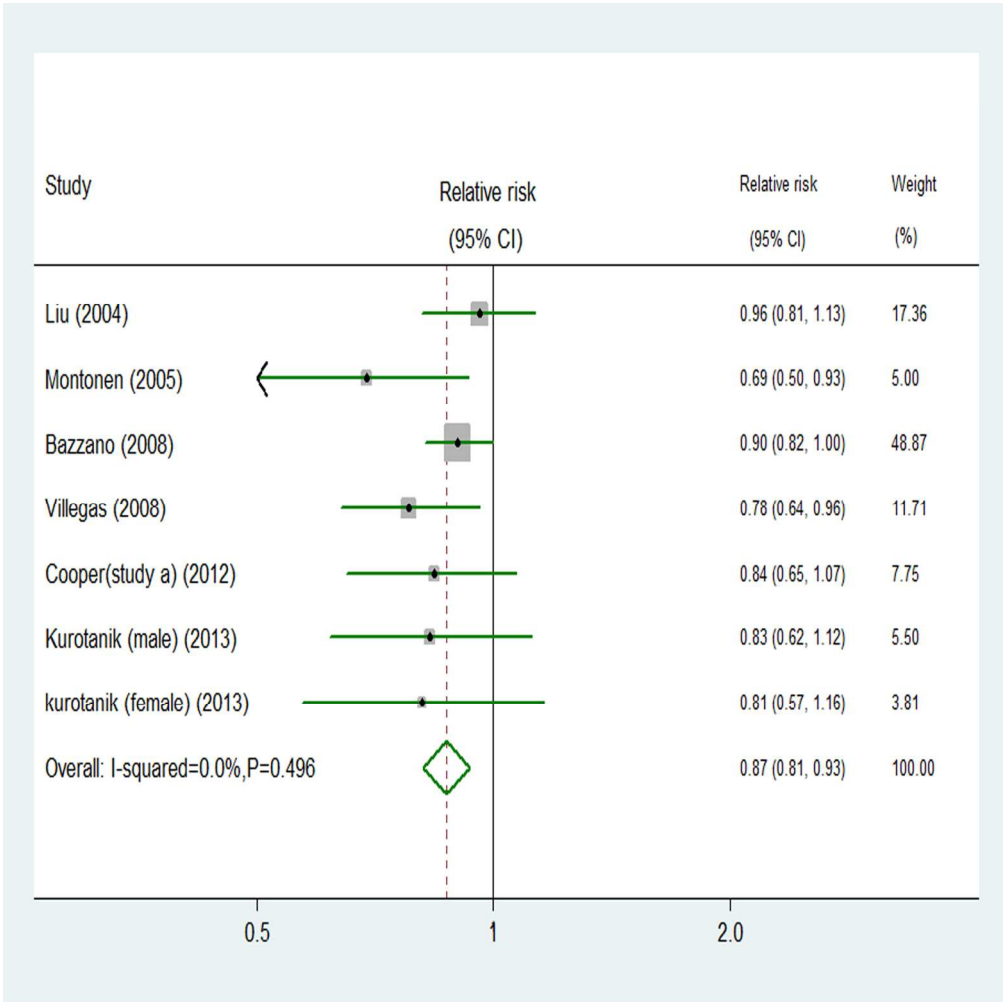

172x172mm (300 x 300 DPI)

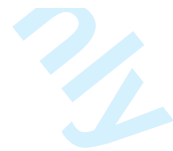

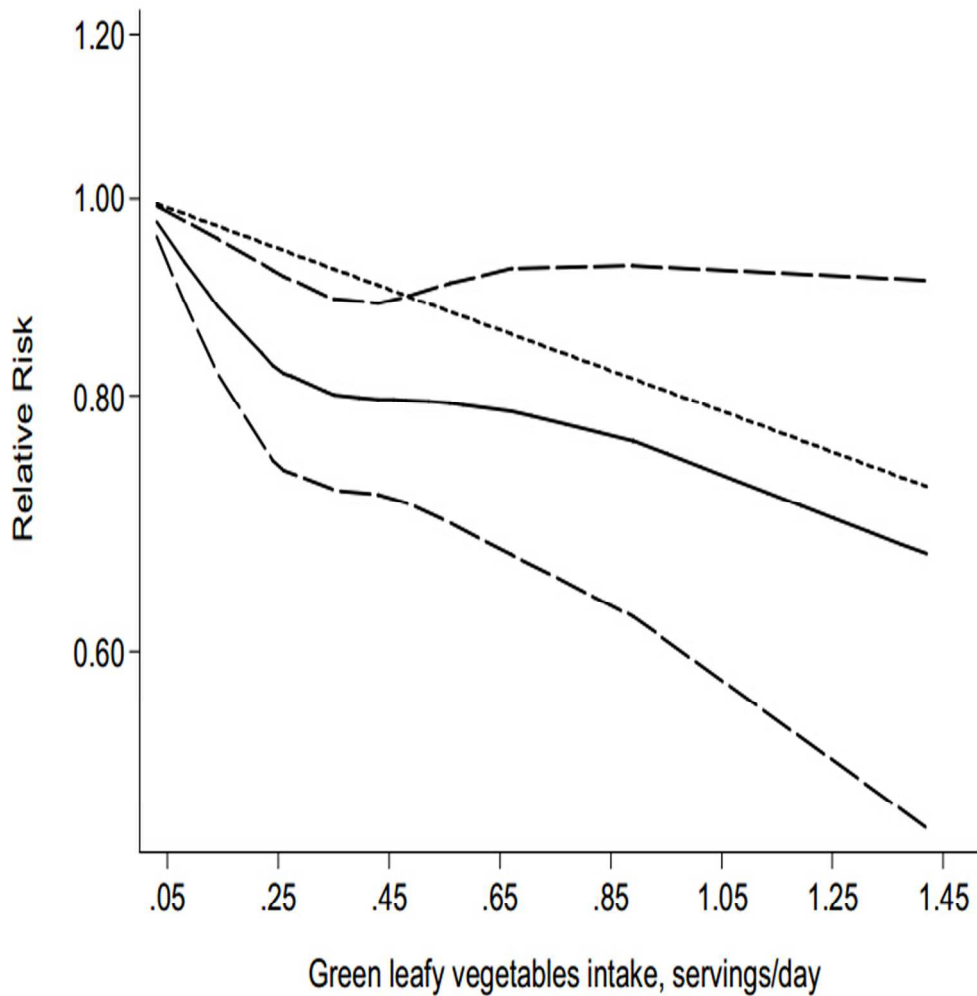

172x172mm (300 x 300 DPI)



1  
2  
3  
4  
5  
6  
7  
8  
9  
10  
11  
12  
13  
14  
15  
16  
17  
18  
19  
20  
21  
22  
23  
24  
25  
26  
27  
28  
29  
30  
31  
32  
33  
34  
35  
36  
37  
38  
39  
40  
41  
42  
43  
44  
45  
46  
47  
48  
49  
50  
51  
52  
53  
54  
55  
56  
57  
58  
59  
60

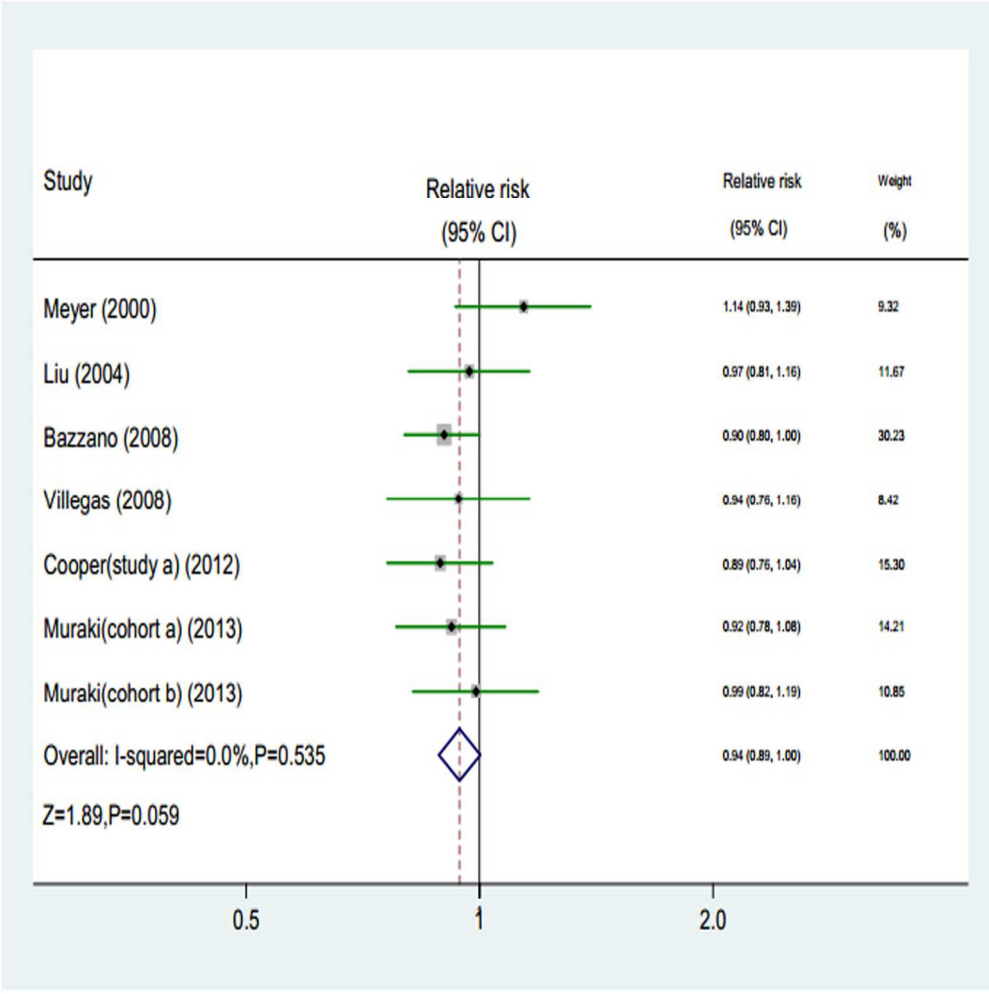

172x172mm (300 x 300 DPI)



1  
2  
3  
4  
5  
6  
7  
8  
9  
10  
11  
12  
13  
14  
15  
16  
17  
18  
19  
20  
21  
22  
23  
24  
25  
26  
27  
28  
29  
30  
31  
32  
33  
34  
35  
36  
37  
38  
39  
40  
41  
42  
43  
44  
45  
46  
47  
48  
49  
50  
51  
52  
53  
54  
55  
56  
57  
58  
59  
60

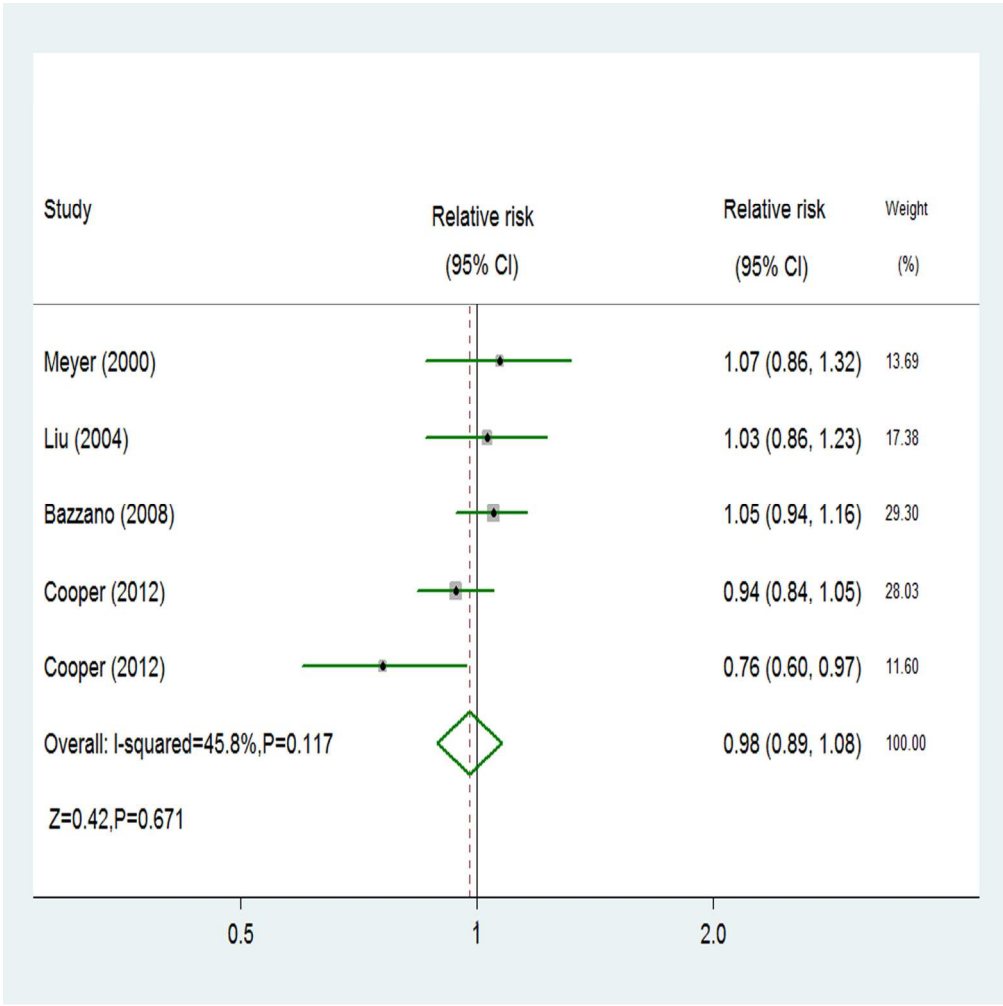

160x160mm (300 x 300 DPI)

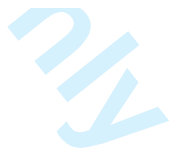

1  
2  
3  
4  
5  
6  
7  
8  
9  
10  
11  
12  
13  
14  
15  
16  
17  
18  
19  
20  
21  
22  
23  
24  
25  
26  
27  
28  
29  
30  
31  
32  
33  
34  
35  
36  
37  
38  
39  
40  
41  
42  
43  
44  
45  
46  
47  
48  
49  
50  
51  
52  
53  
54  
55  
56  
57  
58  
59  
60

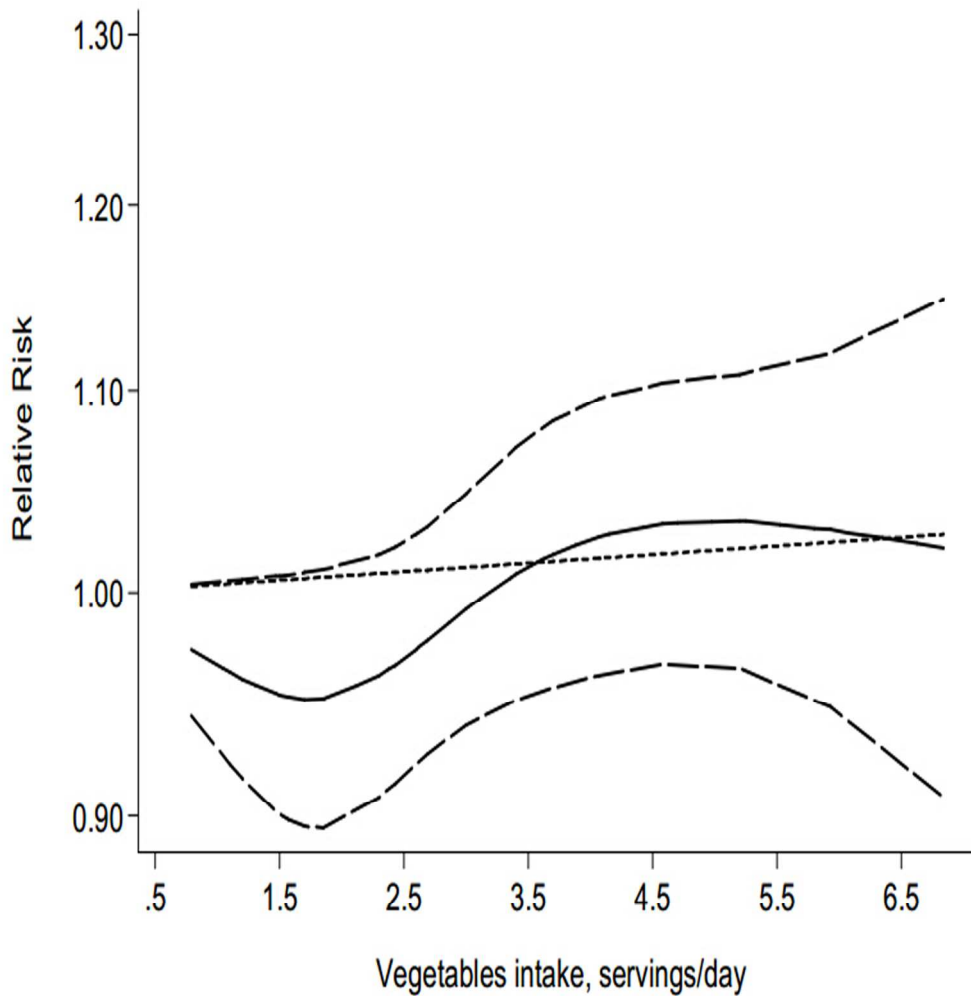

172x172mm (300 x 300 DPI)



1  
2  
3  
4  
5  
6  
7  
8  
9  
10  
11  
12  
13  
14  
15  
16  
17  
18  
19  
20  
21  
22  
23  
24  
25  
26  
27  
28  
29  
30  
31  
32  
33  
34  
35  
36  
37  
38  
39  
40  
41  
42  
43  
44  
45  
46  
47  
48  
49  
50  
51  
52  
53  
54  
55  
56  
57  
58  
59  
60

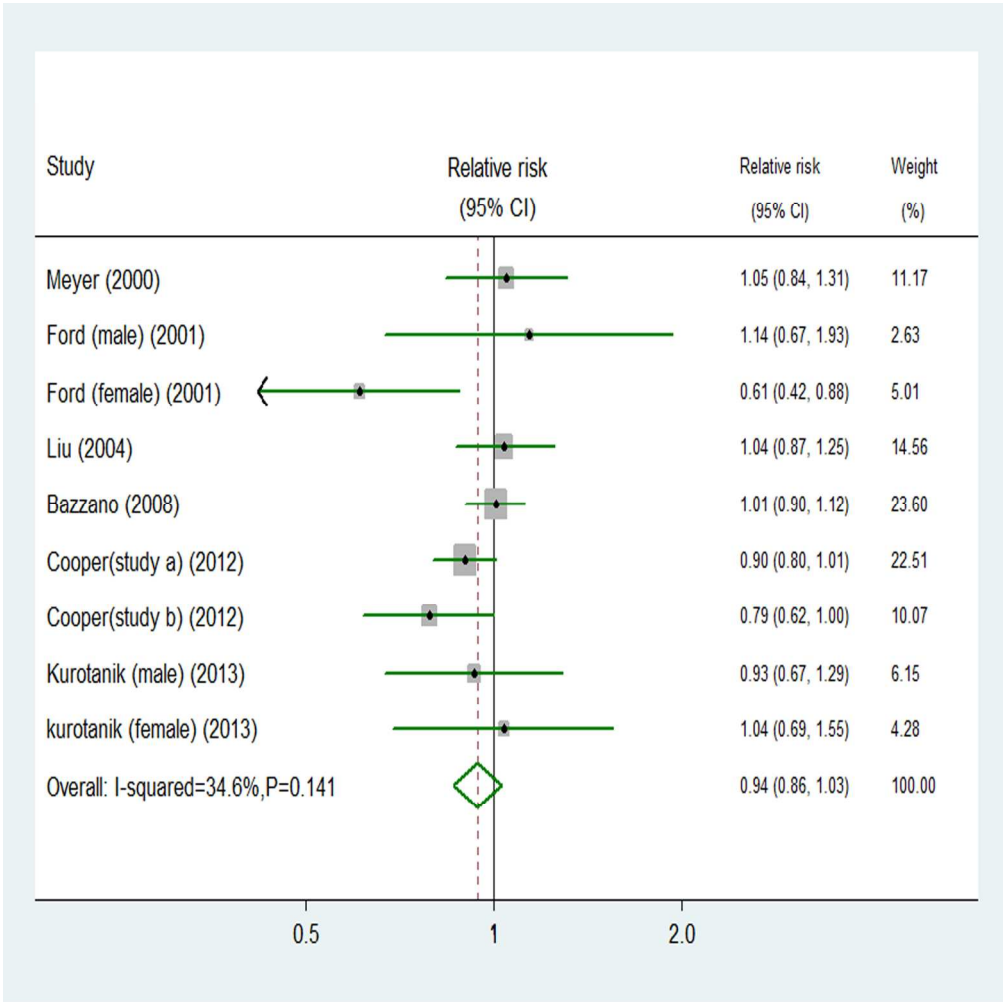

172x172mm (300 x 300 DPI)



1  
2  
3  
4  
5  
6  
7  
8  
9  
10  
11  
12  
13  
14  
15  
16  
17  
18  
19  
20  
21  
22  
23  
24  
25  
26  
27  
28  
29  
30  
31  
32  
33  
34  
35  
36  
37  
38  
39  
40  
41  
42  
43  
44  
45  
46  
47  
48  
49  
50  
51  
52  
53  
54  
55  
56  
57  
58  
59  
60

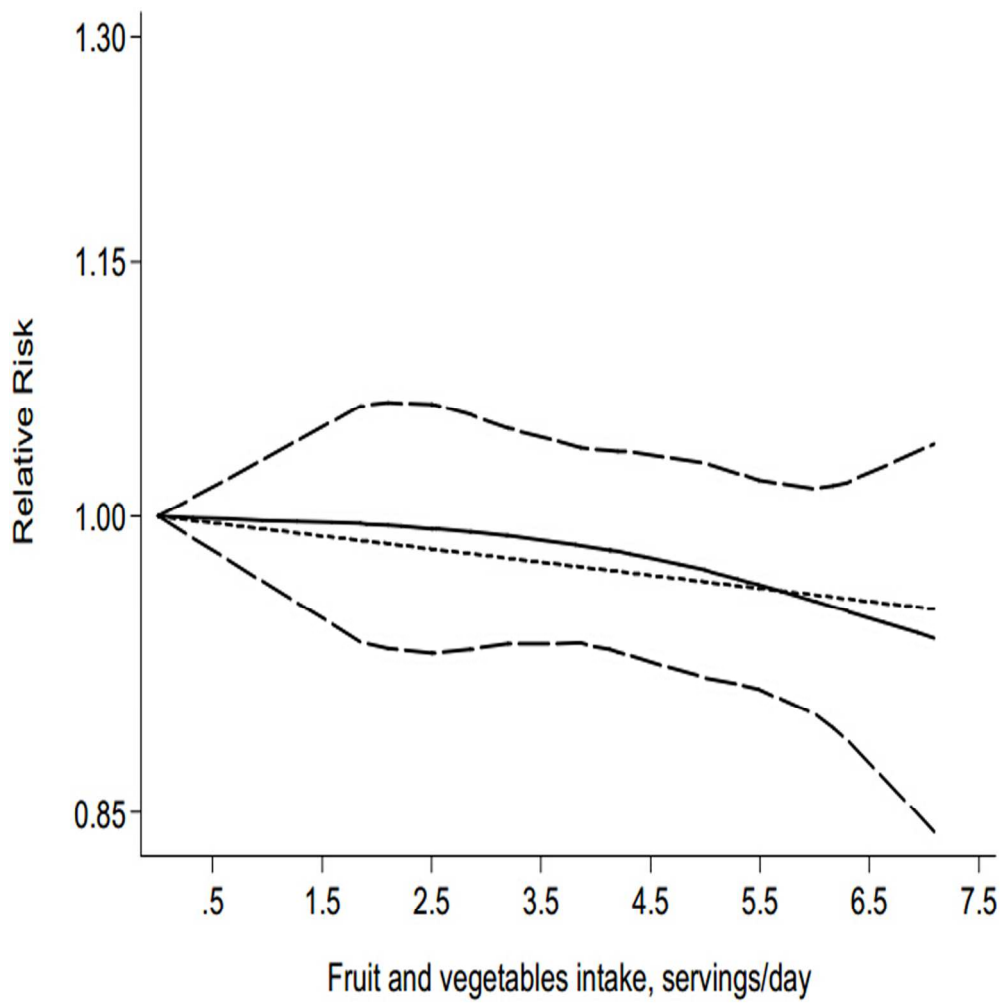

172x172mm (300 x 300 DPI)





1  
2  
3  
4  
5  
6  
7  
8  
9  
10  
11  
12  
13  
14  
15  
16  
17  
18  
19  
20  
21  
22  
23  
24  
25  
26  
27  
28  
29  
30  
31  
32  
33  
34  
35  
36  
37  
38  
39  
40  
41  
42  
43  
44  
45  
46  
47  
48  
49  
50  
51  
52  
53  
54  
55  
56  
57  
58  
59  
60

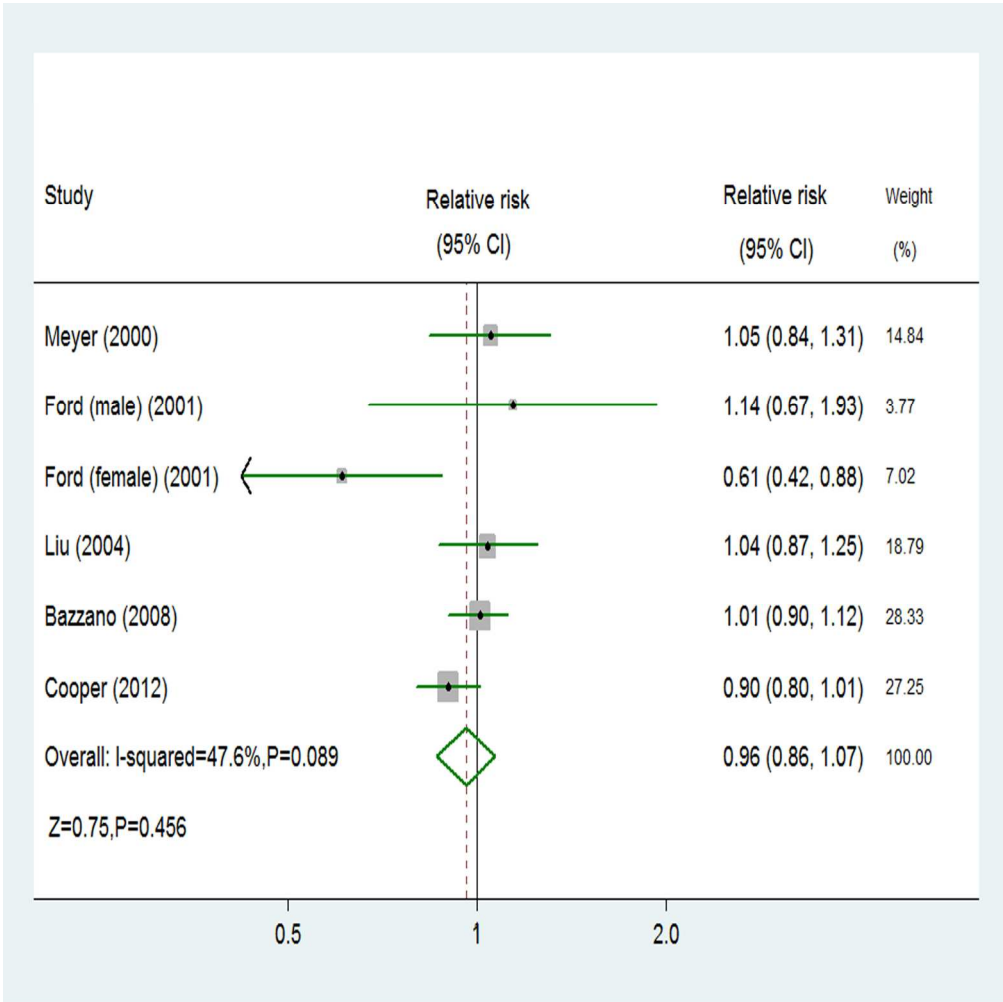

170x170mm (300 x 300 DPI)



1  
2  
3  
4  
5  
6  
7  
8  
9  
10  
11  
12  
13  
14  
15  
16  
17  
18  
19  
20  
21  
22  
23  
24  
25  
26  
27  
28  
29  
30  
31  
32  
33  
34  
35  
36  
37  
38  
39  
40  
41  
42  
43  
44  
45  
46  
47  
48  
49  
50  
51  
52  
53  
54  
55  
56  
57  
58  
59  
60

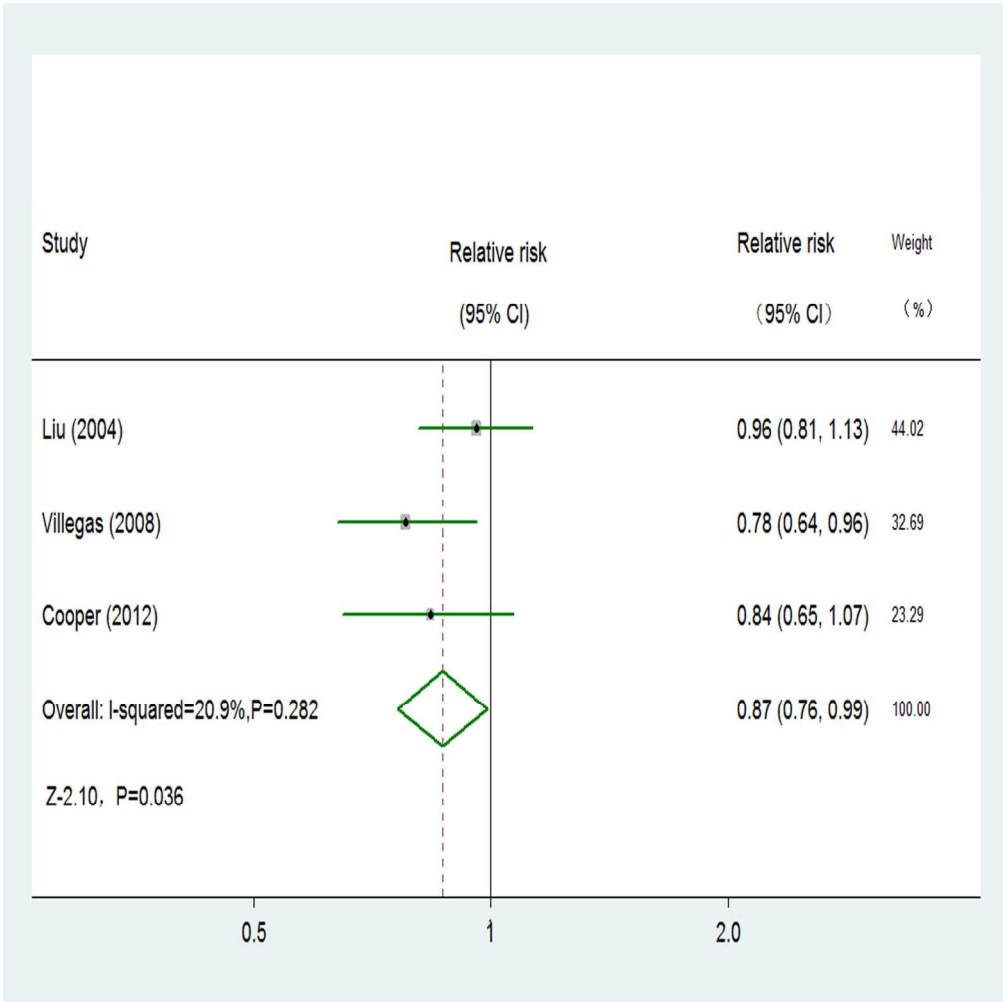

150x150mm (300 x 300 DPI)



**Table A. Characteristics of included studies of fruit and vegetables intake in relation to incident type 2 diabetes**

| First author                          | Country/<br>cohort                     | Age<br>(years)<br>/Sex | No of<br>total/follow<br>-up(years) | No of cases<br>/non-cases | Assessment<br>of type 2<br>diabetes                                              | Measure of intake                                                                                                                                                            | Highest/lowest<br>intakes as<br>servings/day                                                                                      | Adjustments                                                                                                                               | Quality<br>score |
|---------------------------------------|----------------------------------------|------------------------|-------------------------------------|---------------------------|----------------------------------------------------------------------------------|------------------------------------------------------------------------------------------------------------------------------------------------------------------------------|-----------------------------------------------------------------------------------------------------------------------------------|-------------------------------------------------------------------------------------------------------------------------------------------|------------------|
| Meyer et al<br>2000, <sup>43</sup>    | USA/Iowa<br>Women's<br>Health<br>Study | 55-69/F                | 35988/6                             | 1141/3484<br>7            | Based on self<br>reported                                                        | 127 item FFQ. Calculated<br>servings/day for fruit,<br>vegetables, and combined.<br>Data divided into fifths                                                                 | Fruit: 3.36/0.57.<br>Vegetables:<br>5.93/1.57. Fruit<br>and vegetables:<br>8.86/2.57                                              | Age, BMI, total energy<br>intake, WHR,<br>education, smoking,<br>alcohol intake, physical<br>activity                                     | 2                |
| Ford et al<br>2001, <sup>15</sup>     | USA/NHA<br>NES I                       | 25-74/M<br>and F       | 9665/20                             | 1018/8647                 | Confirmed<br>by self report<br>or hospital<br>records or<br>death<br>certificate | 24 hour recall. Calculated<br>servings/week for fruit and<br>vegetables combined. Data<br>divided into thirds                                                                | Fruit and<br>vegetables: $\geq 5/0$                                                                                               | Age, BMI, smoking,<br>SBP, cholesterol,<br>antihypertensive<br>medication, exercise,<br>alcohol, education,<br>ethnicity                  | 1                |
| Liu et al<br>2004, <sup>44</sup>      | USA/Wom<br>en's Health<br>Study        | $\geq 45/F$            | 38018/8.8                           | 1614/3640<br>4            | Based on self<br>reported                                                        | 131 item FFQ. Calculated<br>servings/day for fruit,<br>vegetables and combined.<br>Defined green leafy<br>vegetables as<br>spinach/kale/lettuce. Data<br>divided into fifths | Fruit: 3.91/0.62.<br>Vegetables:<br>6.84/1.47. Fruit<br>and vegetables:<br>10.16/2.54.<br>Green leafy<br>vegetables:<br>1.42/0.14 | Age, BMI, smoking,<br>total calories, alcohol,<br>exercise, history of<br>hypertension/high<br>cholesterol, family<br>history of diabetes | 3                |
| Montonen et al<br>2005, <sup>45</sup> | Finland/Fin<br>nish                    | 40-69/M<br>and F       | 4304/23                             | 383/3921                  | Confirmed<br>via social                                                          | Dietary history interview.<br>Calculated g/day for fruit                                                                                                                     | Fruit: $> 1.47/ <$<br>0.31. Vegetables:                                                                                           | Age, BMI, sex,<br>smoking, energy intake,                                                                                                 | 3                |

1  
2  
3  
4  
5  
6  
7  
8  
9  
10  
11  
12  
13  
14  
15  
16  
17  
18  
19  
20  
21  
22  
23  
24  
25  
26  
27  
28  
29  
30  
31  
32  
33  
34  
35  
36  
37  
38  
39  
40  
41  
42  
43  
44  
45  
46  
47  
48  
49

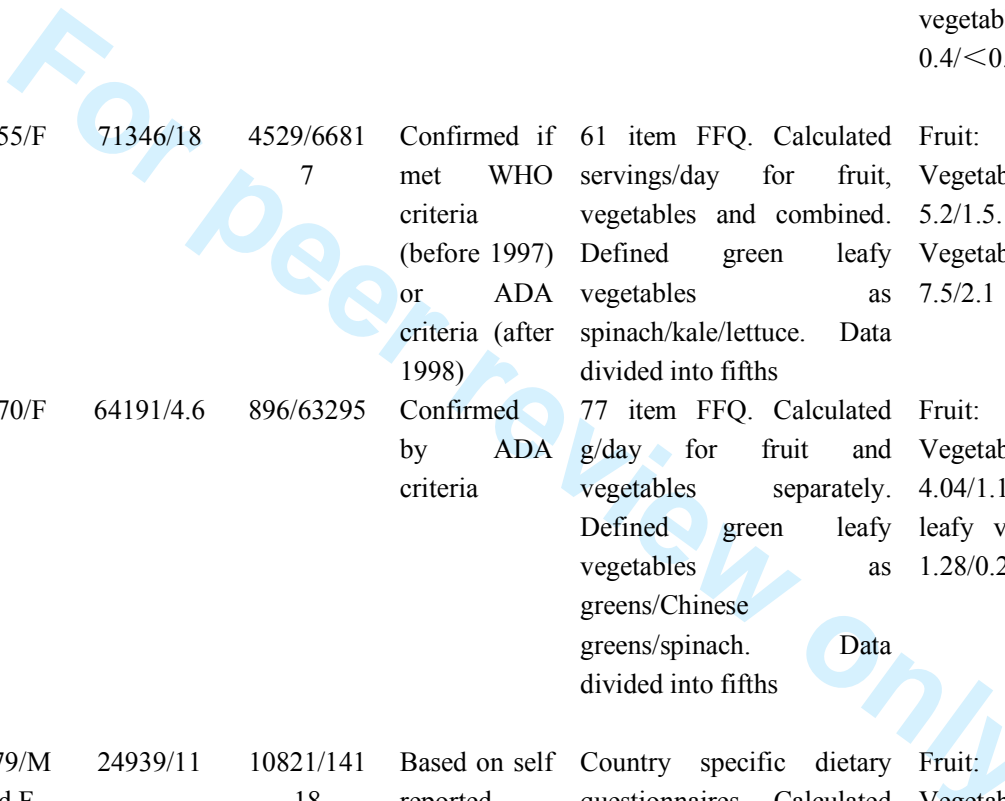

|                                              |                                              |                                                     |               |                 |                                                                                            |                                                                                                                                                                                   |                                                                                             |                                                                                                                                                                                      |                                                   |  |
|----------------------------------------------|----------------------------------------------|-----------------------------------------------------|---------------|-----------------|--------------------------------------------------------------------------------------------|-----------------------------------------------------------------------------------------------------------------------------------------------------------------------------------|---------------------------------------------------------------------------------------------|--------------------------------------------------------------------------------------------------------------------------------------------------------------------------------------|---------------------------------------------------|--|
|                                              |                                              | Mobile<br>Clinic<br>Health<br>Examination<br>Survey |               |                 |                                                                                            | insurance<br>register                                                                                                                                                             | and vegetables separately.<br>Data divided into fifths                                      | > 1.23/ < 0.4.<br>Green leafy<br>vegetables: ><br>0.4/<0.1                                                                                                                           | family history of<br>diabetes, geographic<br>area |  |
| Bazzano et al<br>2008, <sup>47</sup>         | USA/Nurses' Health<br>Study                  | 30-55/F                                             | 71346/18<br>7 | 4529/6681<br>7  | Confirmed if<br>met WHO<br>criteria<br>(before 1997)<br>or ADA<br>criteria (after<br>1998) | 61 item FFQ. Calculated<br>servings/day for fruit,<br>vegetables and combined.<br>Defined green leafy<br>vegetables as<br>spinach/kale/lettuce. Data<br>divided into fifths       | Fruit: 2.5/0.5.<br>Vegetables:<br>5.2/1.5. Fruit and<br>Vegetables:<br>7.5/2.1              | Age, BMI, physical<br>activity, smoking,<br>alcohol, hormone<br>therapy, family history<br>of diabetes, total energy<br>intake                                                       | 4                                                 |  |
| Villegas et al<br>2008, <sup>46</sup>        | China/Shanghai<br>Women's<br>Health<br>Study | 40-70/F                                             | 64191/4.6     | 896/63295       | Confirmed<br>by ADA<br>criteria                                                            | 77 item FFQ. Calculated<br>g/day for fruit and<br>vegetables separately.<br>Defined green leafy<br>vegetables as<br>greens/Chinese<br>greens/spinach. Data<br>divided into fifths | Fruit: 4.56/0.82.<br>Vegetables:<br>4.04/1.15. Green<br>leafy vegetables:<br>1.28/0.26      | Age, BMI, WHR,<br>education, smoking,<br>alcohol, hypertension,<br>disease history,<br>hormone use,<br>occupational history,<br>physical activity,<br>income, daily energy<br>intake | 4                                                 |  |
| Cooper et al<br>(study a) 2012, <sup>5</sup> | 8countries/<br>EPIC-Inter<br>Act study       | 40-79/M<br>and F                                    | 24939/11      | 10821/141<br>18 | Based on self<br>reported                                                                  | Country specific dietary<br>questionnaires. Calculated<br>g/day for fruit, vegetables<br>and combined. Defined<br>green leafy vegetables as                                       | Fruit: 5.39/0.75.<br>Vegetables:<br>3.94/0.88. Fruit<br>and Vegetables:<br>8.71/2.13. Green | Age, BMI, sex,<br>education, centre,<br>physical activity,<br>smoking, total energy<br>intake, alcohol                                                                               | 2                                                 |  |

|    |                     |                                          |         |          |           |                                         |                                                                                                    |                                                                    |                                                                                                                                                              |   |
|----|---------------------|------------------------------------------|---------|----------|-----------|-----------------------------------------|----------------------------------------------------------------------------------------------------|--------------------------------------------------------------------|--------------------------------------------------------------------------------------------------------------------------------------------------------------|---|
|    |                     |                                          |         |          |           |                                         | chard/endive/lettuce/borage<br>/watercress/beet<br>leaves/spinach. Data<br>divided into quarters   | leafy vegetables:<br>5.93/0.05                                     |                                                                                                                                                              |   |
| 11 | Cooper et al        | England/England                          | 40-79/M | 3704/11  | 653/3051  | Based on self reported                  | 117 item FFQ. Calculated servings/day for fruit, vegetables and combined. Data divided into thirds | Fruit: 3.4/0.6. Vegetables: 2.6/1.1. Fruit and Vegetables: 5.7/2.1 | Age, BMI, sex, waist circumference, education, TDI, occupational social class, smoking, physical activity, family history of diabetes, energy intake, season | 2 |
| 12 | (study              | b) PIC-Norfolk                           | and F   |          |           |                                         |                                                                                                    |                                                                    |                                                                                                                                                              |   |
| 13 | 2012, <sup>10</sup> |                                          |         |          |           |                                         |                                                                                                    |                                                                    |                                                                                                                                                              |   |
| 14 |                     |                                          |         |          |           |                                         |                                                                                                    |                                                                    |                                                                                                                                                              |   |
| 15 |                     |                                          |         |          |           |                                         |                                                                                                    |                                                                    |                                                                                                                                                              |   |
| 16 |                     |                                          |         |          |           |                                         |                                                                                                    |                                                                    |                                                                                                                                                              |   |
| 17 |                     |                                          |         |          |           |                                         |                                                                                                    |                                                                    |                                                                                                                                                              |   |
| 18 |                     |                                          |         |          |           |                                         |                                                                                                    |                                                                    |                                                                                                                                                              |   |
| 19 |                     |                                          |         |          |           |                                         |                                                                                                    |                                                                    |                                                                                                                                                              |   |
| 20 |                     |                                          |         |          |           |                                         |                                                                                                    |                                                                    |                                                                                                                                                              |   |
| 21 |                     |                                          |         |          |           |                                         |                                                                                                    |                                                                    |                                                                                                                                                              |   |
| 22 |                     |                                          |         |          |           |                                         |                                                                                                    |                                                                    |                                                                                                                                                              |   |
| 23 | Muraki et al        | USA/Nurses' Health Study II              | 24-44/F | 91246/8  | 741/90505 | Confirmed by ADA criteria (after 1998)  | 133 item FFQ. Calculated servings/week for fruit. Data divided into fifths                         | Fruit: $\geq 3 / < 0.57$                                           | Age, BMI, ethnicity, smoking, multivitamin use, physical activity, family history of diabetes, hormone use, oral contraceptive use, total energy intake      | 4 |
| 24 | (cohort             | a)                                       |         |          |           |                                         |                                                                                                    |                                                                    |                                                                                                                                                              |   |
| 25 | 2013, <sup>11</sup> |                                          |         |          |           |                                         |                                                                                                    |                                                                    |                                                                                                                                                              |   |
| 26 |                     |                                          |         |          |           |                                         |                                                                                                    |                                                                    |                                                                                                                                                              |   |
| 27 |                     |                                          |         |          |           |                                         |                                                                                                    |                                                                    |                                                                                                                                                              |   |
| 28 |                     |                                          |         |          |           |                                         |                                                                                                    |                                                                    |                                                                                                                                                              |   |
| 29 |                     |                                          |         |          |           |                                         |                                                                                                    |                                                                    |                                                                                                                                                              |   |
| 30 |                     |                                          |         |          |           |                                         |                                                                                                    |                                                                    |                                                                                                                                                              |   |
| 31 |                     |                                          |         |          |           |                                         |                                                                                                    |                                                                    |                                                                                                                                                              |   |
| 32 | Muraki et al        | USA/Health Professionals Follow-up Study | 40-75/M | 42504/12 | 1321/4118 | Confirmed by WHO criteria (before 1997) | 131 item FFQ. Calculated servings/month or servings/week for fruit. Data divided into fifths       | Fruit: $\geq 3 / < 0.57$                                           | Age, BMI, ethnicity, smoking, multivitamin use, physical activity, family history of diabetes, hormone use, oral contraceptive use,                          | 4 |
| 33 | (cohort             | b)                                       |         |          |           |                                         |                                                                                                    |                                                                    |                                                                                                                                                              |   |
| 34 | 2013, <sup>11</sup> |                                          |         |          |           |                                         |                                                                                                    |                                                                    |                                                                                                                                                              |   |
| 35 |                     |                                          |         |          |           |                                         |                                                                                                    |                                                                    |                                                                                                                                                              |   |
| 36 |                     |                                          |         |          |           |                                         |                                                                                                    |                                                                    |                                                                                                                                                              |   |
| 37 |                     |                                          |         |          |           |                                         |                                                                                                    |                                                                    |                                                                                                                                                              |   |
| 38 |                     |                                          |         |          |           |                                         |                                                                                                    |                                                                    |                                                                                                                                                              |   |
| 39 |                     |                                          |         |          |           |                                         |                                                                                                    |                                                                    |                                                                                                                                                              |   |
| 40 |                     |                                          |         |          |           |                                         |                                                                                                    |                                                                    |                                                                                                                                                              |   |
| 41 |                     |                                          |         |          |           |                                         |                                                                                                    |                                                                    |                                                                                                                                                              |   |
| 42 |                     |                                          |         |          |           |                                         |                                                                                                    |                                                                    |                                                                                                                                                              |   |
| 43 |                     |                                          |         |          |           |                                         |                                                                                                    |                                                                    |                                                                                                                                                              |   |
| 44 |                     |                                          |         |          |           |                                         |                                                                                                    |                                                                    |                                                                                                                                                              |   |
| 45 |                     |                                          |         |          |           |                                         |                                                                                                    |                                                                    |                                                                                                                                                              |   |
| 46 |                     |                                          |         |          |           |                                         |                                                                                                    |                                                                    |                                                                                                                                                              |   |
| 47 |                     |                                          |         |          |           |                                         |                                                                                                    |                                                                    |                                                                                                                                                              |   |
| 48 |                     |                                          |         |          |           |                                         |                                                                                                    |                                                                    |                                                                                                                                                              |   |
| 49 |                     |                                          |         |          |           |                                         |                                                                                                    |                                                                    |                                                                                                                                                              |   |

1  
2  
3  
4  
5  
6  
7  
8  
9  
10  
11  
12  
13  
14  
15  
16  
17  
18  
19  
20  
21  
22  
23  
24  
25  
26  
27  
28  
29  
30  
31  
32  
33  
34  
35  
36  
37  
38  
39  
40  
41  
42  
43  
44  
45  
46  
47  
48  
49

|                                    |                   |               |         |           |                        |                                                                                                                                                                                                                                  |   |                                                                                                                                                                                                                          |                                                                                                                                                                                                       |   |
|------------------------------------|-------------------|---------------|---------|-----------|------------------------|----------------------------------------------------------------------------------------------------------------------------------------------------------------------------------------------------------------------------------|---|--------------------------------------------------------------------------------------------------------------------------------------------------------------------------------------------------------------------------|-------------------------------------------------------------------------------------------------------------------------------------------------------------------------------------------------------|---|
| Kurotanik et al 2013, <sup>7</sup> | Japan/JPH C Study | 40-69/M and F | 48437/5 | 896/47541 | Based on self reported | 147 item FFQ. Calculated g/day for fruit, vegetables and combined. Defined green leafy vegetables as spinach/Chinese chives/garland chrysanthemums/cbingensa i/leaf mustard/mugwort/chard/ko matsuna. Data divided into quarters | M | Fruit: 3.42/0.34. Vegetables: 3.35/0.71. Fruit and Vegetables: 6.48/1.38. Green leafy vegetables: 0.45/0.04. F Fruit: 4.60/0.7. Vegetables: 3.84/0.94. Fruit and Vegetables: 8.1/1.98. Green leafy vegetables: 0.54/0.07 | total energy intake<br>Age, BMI, public health centre area, smoking, alcohol, leisure-time activity, history of hypertension, coffee, family history of diabetes, Mg intake, Ca intake, energy intake | 3 |
|------------------------------------|-------------------|---------------|---------|-----------|------------------------|----------------------------------------------------------------------------------------------------------------------------------------------------------------------------------------------------------------------------------|---|--------------------------------------------------------------------------------------------------------------------------------------------------------------------------------------------------------------------------|-------------------------------------------------------------------------------------------------------------------------------------------------------------------------------------------------------|---|

---

FFQ=food frequency questionnaire, BMI=body mass index, SBP=systolic blood pressure, TDI=townsend deprivation index, WHR=weight:height ratio, ADA=American Diabetes Association, WHO=World Health Organization, M=male, F=female, study a= the EPIC-InterAct study, study b= the EPIC-Norfolk study, cohort a= the Nurses' Health Study II study, cohort b= the Health Professionals Follow-up Study. The analysis included 13 cohorts among the ten articles, where Ford et al and Kurotani et al study examined male and female separately, Cooper et al have two studies in 2012 and Muraki et al report included data from two independent cohorts.

**Table B. Meta-analysis of intake of fruit and vegetables and risk of type 2 diabetes (highest versus lowest category)**

| Variables              | No of comparisons | Cases/ total | Test of association         | Test of heterogeneity               | Analysis of publication bias        |
|------------------------|-------------------|--------------|-----------------------------|-------------------------------------|-------------------------------------|
|                        |                   |              | Pooled RR (95% CI), P value | Heterogeneity ( $I^2$ , %), P value | Begg's test, Egger's test (P value) |
| Fruit only             | 11                | 22995/424677 | 0.93 (0.88 to 0.99), 0.015  | 0, 0.477                            | 0.533, 0.849                        |
| Vegetables only        | 9                 | 20933/290927 | 0.90 (0.80 to 1.01), 0.068  | 66.5, 0.002                         | 0.602, 0.176                        |
| Fruit and vegetables   | 9                 | 20672/232097 | 0.94 (0.86 to 1.03), 0.202  | 34.6, 0.141                         | 0.348, 0.609                        |
| Green leafy vegetables | 7                 | 19139/251235 | 0.87 (0.81 to 0.93), 0.000  | 0, 0.496                            | 0.133, 0.101                        |

## MOOSE Checklist

### **Fruit and vegetable intake and risk of type 2 diabetes mellitus: meta-analysis of prospective cohort studies**

Min Li *master student*<sup>1</sup>, Yingli Fan *master student*<sup>2</sup>, Xiaowei Zhang *master student*<sup>1</sup>, Wenshang Hou *master student*<sup>1</sup>, Zhenyu Tang *associate professor*<sup>1</sup>

<sup>1</sup>Department of Neurology, The Second Affiliated Hospital of Nanchang University, Nanchang 330006, Jiangxi Province, People's Republic of China;

<sup>2</sup>Department of Cardiovascular, The Second Affiliated Hospital of Nanchang University, Nanchang 330006, Jiangxi Province, People's Republic of China

Correspondence to: Z Tang, Department of Neurology, The Second Affiliated Hospital of Nanchang University, No. 1, Minde Road, Nanchang, Jiangxi 330006, People's Republic of China

Email: [zytang07016@sina.com](mailto:zytang07016@sina.com)



| Criteria                                                                        | Brief description of how the criteria were handled in the meta-analysis                                                                                                                                                                                                                                                                                                                                                                                                                                                                                                                                                                                                                                               |
|---------------------------------------------------------------------------------|-----------------------------------------------------------------------------------------------------------------------------------------------------------------------------------------------------------------------------------------------------------------------------------------------------------------------------------------------------------------------------------------------------------------------------------------------------------------------------------------------------------------------------------------------------------------------------------------------------------------------------------------------------------------------------------------------------------------------|
| <b>Reporting of background should include</b>                                   |                                                                                                                                                                                                                                                                                                                                                                                                                                                                                                                                                                                                                                                                                                                       |
| √ Problem definition                                                            | Type 2 diabetes (T2D) is one of the most common noncommunicable diseases which is expected to affect in excess of 439 million adults worldwide by 2030, with serious consequences for health care expenditure. The prevention of T2D is thus clearly an important public health priority. Among the known risk factors for T2D, dietary factors have aroused particular attention. Lifestyle intervention trials that include dietary modification have been shown to be effective in delaying or preventing the development of T2D. Although the effect of individual components or interactions between nutrients is still largely unknown, fruit and vegetables intake may explain some of this beneficial effect. |
| √ Hypothesis statement                                                          | Fruit and vegetable intake decrease risk of type 2 diabetes mellitus.                                                                                                                                                                                                                                                                                                                                                                                                                                                                                                                                                                                                                                                 |
| √ Description of study outcomes                                                 | Type 2 diabetes mellitus.                                                                                                                                                                                                                                                                                                                                                                                                                                                                                                                                                                                                                                                                                             |
| √ Type of exposure or intervention used                                         | Fruit, vegetables, or green leafy vegetables                                                                                                                                                                                                                                                                                                                                                                                                                                                                                                                                                                                                                                                                          |
| √ Type of study designs used                                                    | We included (1) original studies (eg, not review articles, meeting abstracts, editorials, or commentaries); (2) prospective design (eg, not cross sectional design, case-control design).                                                                                                                                                                                                                                                                                                                                                                                                                                                                                                                             |
| √ Study population                                                              | We placed no restriction.                                                                                                                                                                                                                                                                                                                                                                                                                                                                                                                                                                                                                                                                                             |
| <b>Reporting of search strategy should include</b>                              |                                                                                                                                                                                                                                                                                                                                                                                                                                                                                                                                                                                                                                                                                                                       |
| √ Qualifications of searchers                                                   | The credentials of the two investigators XZ and WH are indicated in the author list.                                                                                                                                                                                                                                                                                                                                                                                                                                                                                                                                                                                                                                  |
| √ Search strategy, including time period included in the synthesis and keywords | PubMed from 1965 –February 2014<br>EMBASE from 1974 –February 2014<br>Keywords: (“fruits” OR “vegetables” OR “citrus”) AND (“Type 2 diabetes” OR “non-insulin-dependent diabetes mellitus” OR “Diabetes Mellitus, Type 2” OR “NIDDM” OR “prediabetes” OR “impaired glucose tolerance” OR “impaired fasting glucose” OR “glucose” OR “hyperglycaemia” OR “insulin”) AND (“Follow-up studies” OR “prospective studies” OR “cohort studies” OR “longitudinal studies”).                                                                                                                                                                                                                                                  |
| √ Databases and registries searched                                             | PubMed and EMBASE                                                                                                                                                                                                                                                                                                                                                                                                                                                                                                                                                                                                                                                                                                     |
| √ Search software used, name and version, including special features            | We did not employ a search software. EndNote was used to merge retrieved citations and eliminate duplications                                                                                                                                                                                                                                                                                                                                                                                                                                                                                                                                                                                                         |
| √ Use of hand searching                                                         | We hand-searched bibliographies of retrieved papers for                                                                                                                                                                                                                                                                                                                                                                                                                                                                                                                                                                                                                                                               |

|                                            |                                                                                                                                            |                                                                                                                                                                                                                                                                                                                                                                                                                                                                                                                                                                                                                                                                                                                                                                                         |
|--------------------------------------------|--------------------------------------------------------------------------------------------------------------------------------------------|-----------------------------------------------------------------------------------------------------------------------------------------------------------------------------------------------------------------------------------------------------------------------------------------------------------------------------------------------------------------------------------------------------------------------------------------------------------------------------------------------------------------------------------------------------------------------------------------------------------------------------------------------------------------------------------------------------------------------------------------------------------------------------------------|
|                                            |                                                                                                                                            | additional references,                                                                                                                                                                                                                                                                                                                                                                                                                                                                                                                                                                                                                                                                                                                                                                  |
| √                                          | List of citations located and those excluded, including justifications                                                                     | Details of the literature search process are outlined in the process of literature search and study selection. The citation list is available upon request                                                                                                                                                                                                                                                                                                                                                                                                                                                                                                                                                                                                                              |
| √                                          | Method of addressing articles published in languages other than English                                                                    | We placed no restrictions on language; local scientists fluent in the original language of the article were contacted for translation                                                                                                                                                                                                                                                                                                                                                                                                                                                                                                                                                                                                                                                   |
| √                                          | Method of handling abstracts and unpublished studies                                                                                       | We had contacted a few authors for unpublished studies on the association.                                                                                                                                                                                                                                                                                                                                                                                                                                                                                                                                                                                                                                                                                                              |
| √                                          | Description of any contact with authors                                                                                                    | We contacted authors who had conducted multivariate analysis with diabetes as a covariate, but had not reported relative risk for fruit, vegetables, or green leafy vegetables.                                                                                                                                                                                                                                                                                                                                                                                                                                                                                                                                                                                                         |
| <b>Reporting of methods should include</b> |                                                                                                                                            |                                                                                                                                                                                                                                                                                                                                                                                                                                                                                                                                                                                                                                                                                                                                                                                         |
| √                                          | Description of relevance or appropriateness of studies assembled for assessing the hypothesis to be tested                                 | Detailed inclusion and exclusion criteria were described in the methods section.                                                                                                                                                                                                                                                                                                                                                                                                                                                                                                                                                                                                                                                                                                        |
| √                                          | Rationale for the selection and coding of data                                                                                             | Data extracted from each of the studies were relevant to the population characteristics, study design, exposure, outcome, and possible effect modifiers of the association.                                                                                                                                                                                                                                                                                                                                                                                                                                                                                                                                                                                                             |
| √                                          | Assessment of confounding                                                                                                                  | Restricted the analysis to age-adjusted estimates only. Conducted sensitivity analyses by eliminating studies that had not adjusted for possible confounders.                                                                                                                                                                                                                                                                                                                                                                                                                                                                                                                                                                                                                           |
| √                                          | Assessment of study quality, including blinding of quality assessors; stratification or regression on possible predictors of study results | Quality was assessed with a total score from 0 to 6 points. The system was created to account for study eligibility (1 point for appropriate inclusion and exclusion criteria), outcome (1 point if diagnosis of T2D was based on accepted clinical criteria, and not solely based on self-report), exposure (1 point if fruit and vegetables consumption were assessed with a validated tool, and 1 point if fruit and vegetables consumption were appropriately categorized), statistical analysis (1 point was given if adjustment included a few variables such as age, sex, body mass index, and family history of T2D, these being proven risk factors for T2D). Another point was given for any other factors were adjusted (such as alcohol, education, and physical activity). |
| √                                          | Assessment of heterogeneity                                                                                                                | Heterogeneity of the studies were explored within two types of study designs using Cochrane's Q test of heterogeneity and $I^2$ statistic that provides the relative amount of variance of the summary effect due to the between-study heterogeneity.                                                                                                                                                                                                                                                                                                                                                                                                                                                                                                                                   |
| √                                          | Description of statistical methods in sufficient detail to be replicated                                                                   | Description of methods of meta-analyses, sensitivity analyses, subgroup analyses and assessment of publication bias are detailed in the methods.                                                                                                                                                                                                                                                                                                                                                                                                                                                                                                                                                                                                                                        |

|                                                |                                                                   |                                                                                                                                                                                                                                                                                                                                                                            |
|------------------------------------------------|-------------------------------------------------------------------|----------------------------------------------------------------------------------------------------------------------------------------------------------------------------------------------------------------------------------------------------------------------------------------------------------------------------------------------------------------------------|
| √                                              | Provision of appropriate tables and graphics                      | We included 1 flow chart, several summary tables and figures.                                                                                                                                                                                                                                                                                                              |
| <b>Reporting of results should include</b>     |                                                                   |                                                                                                                                                                                                                                                                                                                                                                            |
| √                                              | Graph summarizing individual study estimates and overall estimate | Figure 2, 4, 5 and D                                                                                                                                                                                                                                                                                                                                                       |
| √                                              | Table giving descriptive information for each study included      | Table A                                                                                                                                                                                                                                                                                                                                                                    |
| √                                              | Results of sensitivity testing                                    | Table 1                                                                                                                                                                                                                                                                                                                                                                    |
| √                                              | Indication of statistical uncertainty of findings                 | 95% confidence intervals were presented with all summary estimates, $I^2$ values and results of sensitivity analyses                                                                                                                                                                                                                                                       |
| <b>Reporting of discussion should include</b>  |                                                                   |                                                                                                                                                                                                                                                                                                                                                                            |
| √                                              | Quantitative assessment of bias                                   | Subgroup analyses indicate heterogeneity in strengths of the association due to most common biases in cohort studies.                                                                                                                                                                                                                                                      |
| √                                              | Justification for exclusion                                       | We excluded studies that had not adjusted for or were standardized by age, a potential confounder, and used different exposure or outcome assessment for the comparison groups.                                                                                                                                                                                            |
| √                                              | Assessment of quality of included studies                         | We discussed the results of the subgroup analyses, and potential reasons for the observed heterogeneity.                                                                                                                                                                                                                                                                   |
| <b>Reporting of conclusions should include</b> |                                                                   |                                                                                                                                                                                                                                                                                                                                                                            |
| √                                              | Consideration of alternative explanations for observed results    | We discussed that potential unmeasured confounders such as other chronic diseases may have caused residual confounding, but the measured factors that are correlated with such confounders would have mitigated the bias. We noted that the variations in the strengths of association may be due to true population differences, or to differences in quality of studies. |
| √                                              | Generalization of the conclusions                                 | Our meta-analysis suggests that higher fruit or vegetables, particularly GLV intake is associated with a significantly reduced risk of T2D. In addition, the dose-response relations also indicate that relatively high fruit or GLV may still decrease risk of T2D.                                                                                                       |
| √                                              | Guidelines for future research                                    | We recommend future preferably randomized controlled studies should explore what kind of fruit or GLV can reduce the risk of T2D.                                                                                                                                                                                                                                          |
| √                                              | Disclosure of funding source                                      | No separate funding was necessary for the undertaking of this systematic review.                                                                                                                                                                                                                                                                                           |

# BMJ Open

## Fruit and vegetable intake and risk of type 2 diabetes mellitus: meta-analysis of prospective cohort studies

|                                 |                                                                                                                                                                                                                                                                                                                                                                                                                                                                                                                                                                                                                                                                                                                                                                                                                           |
|---------------------------------|---------------------------------------------------------------------------------------------------------------------------------------------------------------------------------------------------------------------------------------------------------------------------------------------------------------------------------------------------------------------------------------------------------------------------------------------------------------------------------------------------------------------------------------------------------------------------------------------------------------------------------------------------------------------------------------------------------------------------------------------------------------------------------------------------------------------------|
| Journal:                        | <i>BMJ Open</i>                                                                                                                                                                                                                                                                                                                                                                                                                                                                                                                                                                                                                                                                                                                                                                                                           |
| Manuscript ID:                  | bmjopen-2014-005497.R2                                                                                                                                                                                                                                                                                                                                                                                                                                                                                                                                                                                                                                                                                                                                                                                                    |
| Article Type:                   | Research                                                                                                                                                                                                                                                                                                                                                                                                                                                                                                                                                                                                                                                                                                                                                                                                                  |
| Date Submitted by the Author:   | 11-Sep-2014                                                                                                                                                                                                                                                                                                                                                                                                                                                                                                                                                                                                                                                                                                                                                                                                               |
| Complete List of Authors:       | Tang, Zhenyu; The Second Affiliated Hospital of Nanchang University, Nanchang 330006, Jiangxi Province, People's Republic of China, Department of Neurology<br>Li, Min; The Second Affiliated Hospital of Nanchang University, Nanchang 330006, Jiangxi Province, People's Republic of China, Department of Neurology<br>Fan, Yingli; The Second Affiliated Hospital of Nanchang University, Nanchang 330006, Jiangxi Province, People's Republic of China, Department of Cardiovascular<br>Zhang, Xiaowei; The Second Affiliated Hospital of Nanchang University, Nanchang 330006, Jiangxi Province, People's Republic of China, Department of Neurology<br>Hou, Wenshang; The Second Affiliated Hospital of Nanchang University, Nanchang 330006, Jiangxi Province, People's Republic of China, Department of Neurology |
| <b>Primary Subject Heading</b>: | Diabetes and endocrinology                                                                                                                                                                                                                                                                                                                                                                                                                                                                                                                                                                                                                                                                                                                                                                                                |
| Secondary Subject Heading:      | Diabetes and endocrinology, Public health                                                                                                                                                                                                                                                                                                                                                                                                                                                                                                                                                                                                                                                                                                                                                                                 |
| Keywords:                       | General diabetes < DIABETES & ENDOCRINOLOGY, Quality in health care < HEALTH SERVICES ADMINISTRATION & MANAGEMENT, Diabetes & endocrinology < INTERNAL MEDICINE                                                                                                                                                                                                                                                                                                                                                                                                                                                                                                                                                                                                                                                           |
|                                 |                                                                                                                                                                                                                                                                                                                                                                                                                                                                                                                                                                                                                                                                                                                                                                                                                           |

SCHOLARONE™  
Manuscripts

1  
2  
3  
4 **Fruit and vegetable intake and risk of type 2 diabetes mellitus:**  
5  
6 **meta-analysis of prospective cohort studies**  
7  
8

9 **Min Li *master student*<sup>1</sup>, Yingli Fan *master student*<sup>2</sup>, Xiaowei Zhang *master***  
10 ***student*<sup>1</sup>, Wenshang Hou *master student*<sup>1</sup>, Zhenyu Tang *associate professor*<sup>1</sup>**  
11

12  
13  
14 <sup>1</sup>Department of Neurology, The Second Affiliated Hospital of Nanchang University, Nanchang  
15 330006, Jiangxi Province, People's Republic of China; <sup>2</sup>Department of Cardiovascular, The  
16 Second Affiliated Hospital of Nanchang University, Nanchang 330006, Jiangxi Province, People's  
17 Republic of China  
18  
19  
20

21 Correspondence to: Z Tang, Department of Neurology, The Second Affiliated Hospital of  
22 Nanchang University, No. 1, Minde Road, Nanchang, Jiangxi 330006, People's Republic of China  
23  
24  
25 zytang07016@sina.com  
26  
27  
28  
29  
30  
31  
32  
33  
34  
35  
36  
37  
38  
39  
40  
41  
42  
43  
44  
45  
46  
47  
48  
49  
50  
51  
52  
53  
54  
55  
56  
57  
58  
59  
60

## Abstract

**Objective** To clarify and quantify the potential dose-response association between the intake of fruit and vegetables and risk of type 2 diabetes.

**Design** Meta-analysis and systematic review of prospective cohort studies.

**Data source** Studies published before February 2014 identified through electronic searches using PubMed and Embase.

**Eligibility criteria for selecting studies** Prospective cohort studies with relative risks and 95% confidence intervals for type 2 diabetes according to the intake of fruit, vegetables, or fruit and vegetables.

**Results** A total of ten articles including thirteen comparisons with 24 013 cases of type 2 diabetes and 434 342 participants were included in the meta-analysis. Evidence of curve linear associations were seen between fruit and green leafy vegetables consumption and risk of type 2 diabetes ( $P=0.059$  and  $P=0.036$  for non-linearity, respectively). The summary relative risk of type 2 diabetes for an increase of 1 serving fruit consumed per day was 0.93 (95% confidence interval 0.88 to 0.99) without heterogeneity among studies ( $P=0.477$ ,  $I^2=0\%$ ). For vegetables, the combined relative risk of type 2 diabetes for an increase of 1 serving consumed per day was 0.90 (95% confidence interval 0.80 to 1.01) with moderate heterogeneity among studies ( $P=0.002$ ,  $I^2=66.5\%$ ). For green leafy vegetables, the summary relative risk of type 2 diabetes for an increase of 0.2 serving consumed per day was 0.87 (95% confidence interval 0.81 to 0.93) without heterogeneity among studies ( $P=0.496$ ,  $I^2=0\%$ ). The combined estimates showed no significant benefits of increasing the consumption of fruit and vegetables combined.

**Conclusions** Higher fruit or green leafy vegetables intake is associated with a significantly reduced risk of type 2 diabetes.

## Article summary

Strengths and limitations of this study

To our knowledge, this is the largest systematic review and meta-analysis on the intake of fruit and vegetables and risk of type 2 diabetes. We also investigated a dose-response relation between fruit, vegetables, fruit and vegetables combined consumption and risk of type 2 diabetes.

The possibility of residual confounding or confounding by unmeasured factors, which cannot be ruled out in any observational study, must be acknowledged. We cannot exclude the possibility of recall bias in the assessments of diet based on the food frequency questionnaires.

1. Health expenditure on type 2 diabetes is increasing worldwide.
2. Epidemiological studies suggest that the intake of fruit and vegetables is beneficial in delaying or preventing the development of type 2 diabetes, though results from cohort studies are controversial.
3. Higher fruit or vegetables, particularly green leafy vegetables intake is associated with a significantly reduced risk of type 2 diabetes.
4. Dose-response analyses indicated a 6% lower risk of type 2 diabetes per 1 serving/day increment of fruit intake and 13% lower risk of type 2 diabetes per 0.2 serving/day increment of green leafy vegetables intake.
5. Further evidence from preferably randomized controlled studies should explore what kind of fruit or green leafy vegetables can reduce the risk of type 2 diabetes.

## Introduction

Type 2 diabetes (T2D) is one of the most common noncommunicable diseases which is expected to affect in excess of 439 million adults worldwide by 2030,<sup>1</sup> with serious consequences for health care expenditure.<sup>2</sup> It has been estimated that the global health expenditure on diabetes is at least \$ 376 billion in 2010 and will be \$ 490 billion in 2030,<sup>3</sup> this creates a major public health burden. The prevention of T2D is thus clearly an important public health priority. In recent decades, concern has mounted regarding the premature mortality and morbidity associated with T2D, with growing interest in altering risk factors and reversing this global epidemic. Among the known risk factors for T2D, dietary factors have aroused particular attention. Lifestyle intervention trials that include dietary modification have been shown to be effective in delaying or preventing the development of T2D.<sup>4</sup> Although the effect of individual components or interactions between nutrients is still largely unknown, fruit and vegetables intake may explain some of this beneficial effect.<sup>5</sup>

To minimize the risk of dietary factors and reduce the incidence of T2D, a World Health Organization recommended the public to consume more than 400 g or five portions of combined fruit and vegetables per day for the prevention of T2D.<sup>6</sup> Nevertheless, in the Japan Public Health Center-based Prospective (JPHC) Study,<sup>7</sup> after a mean follow-up over five years, participants with the intake of fruit and vegetables may not be appreciably associated with the risk of T2D. Vegetables, especially green leafy vegetables (GLV), have been suggested to explain an apparent beneficial effect on T2D. In addition, several meta-analyses of observational studies have found that an increase in daily intake of GLV could significantly reduce the risk of T2D.<sup>5,8,9</sup> These studies were restricted by heterogeneous with respect to sample size. Additionally, recent studies involving relationship between the intake of fruit and vegetables and risk of T2D have been published from then on.<sup>5,7,10,11</sup> Furthermore, whether any dose-response relation exists between the intake of fruit and vegetables and risk of T2D is unknown. Therefore, we systematically reviewed and meta-analysed available studies to quantify the associations between dietary intake of fruit and vegetables and incidence of T2D based on identified prospective cohort studies. We pooled risk estimates for the highest versus lowest category of intake to examine the overall association. We also conducted a dose-response analysis for the trend estimation.

## Methods

### Search strategy

We carried out a systematic search of PubMed (Medline) and Embase through February 2014 for prospective cohort studies examining the association between the intake of fruit and vegetables and risk of T2D. The following key words were used in our search strategies: (“fruits” OR “vegetables” OR “citrus”) AND (“Type 2 diabetes” OR “non-insulin-dependent diabetes mellitus” OR “Diabetes Mellitus, Type 2” OR “NIDDM” OR “prediabetes” OR “impaired glucose tolerance” OR “impaired fasting glucose” OR “glucose” OR “hyperglycaemia” OR “insulin”) AND (“Follow-up studies” OR “prospective studies” OR “cohort studies” OR “longitudinal studies”). We restricted the search to human studies. No language restrictions were imposed. In addition, we scrutinized possible eligible references from relevant original papers and review articles to identify potential publications. We followed standard criteria for the performing and reporting of the meta-analyses of observational studies.<sup>12</sup>

### Study selection



1  
2  
3 Citations selected from the initial search were subsequently screened for eligibility. Studies were  
4 included in this meta-analysis if they satisfied the following criteria: (1) original studies (eg, not  
5 review articles, meeting abstracts, editorials, or commentaries); (2) prospective design (eg, not  
6 cross sectional design, case-control design); (3) the exposure of interest was the intake of fruits,  
7 vegetables, or fruit and vegetables combined; (4) the outcome was T2D; and (5) reported  
8 multivariate-adjusted risk estimates for the association between the fruit, vegetables, or fruit and  
9 vegetables combined, assessed as dietary intake, and T2D. Additionally, we excluded animal  
10 studies and letters without sufficient data. If data were reported more than once, we included the  
11 study with the longest follow-up time.

#### 14 **Validity assessment**

15 Two authors (ML and YF) independently assessed all studies for quality using a modified scoring  
16 system, which allowed a total score from 0 to 6 points (6 reflecting the highest quality) on the  
17 basis of MOOSE,<sup>12</sup> QUATSO,<sup>13</sup> and STROBE.<sup>14</sup> The system was created to account for study  
18 eligibility (1 point for appropriate inclusion and exclusion criteria), outcome (1 point if diagnosis  
19 of T2D was based on accepted clinical criteria, and not solely based on self-report), exposure (1  
20 point if fruit and vegetables consumption were assessed with a validated tool, and 1 point if fruit  
21 and vegetables consumption were appropriately categorized), statistical analysis (1 point was  
22 given if adjustment included a few variables such as age, sex, body mass index, and family history  
23 of T2D, these being proven risk factors for T2D). Another point was given for any other factors  
24 were adjusted (such as alcohol, education, and physical activity).<sup>9</sup>

#### 28 **Data extraction**

29 Data were carried out independently by two other authors (XZ and WH) using a standard  
30 electronic sheets and cross-check to reach a consensus. For each study, the following information  
31 was abstracted: name of the first author, publication year, study population, geographical location,  
32 sex, age range, sample size (number of T2D cases, number of non-T2D cases, and number of  
33 participants), duration of follow-up, methods used to assess fruit and vegetables intake and  
34 ascertain T2D cases, highest and lowest of fruit and vegetables intake, and covariates adjusted for  
35 in the multivariable model. Study quality was evaluated by using the modified scoring system. All  
36 data were extracted from the published papers. If necessary, the primary authors were contacted to  
37 retrieve further information. For two studies that expressed data separately for men and women,<sup>7,15</sup>  
38 one study that included data from multiple cohorts,<sup>11</sup> we considered the analysis for each sex or  
39 cohort as an independent comparison and extracted data separately.

#### 44 **Statistical analysis**

45 Within each study, we used multivariate-adjusted outcome data (expressed as relative risks and  
46 95% confidence intervals) for risk estimates. For the present analyses we assumed hazard ratios to  
47 be a valid approximation of relative risks, we converted these values in every study by taking their  
48 natural logarithms and calculating standard errors and corresponding 95% confidence intervals.  
49 Relative risks and their standard errors were pooled with the DerSimonian and Laird random  
50 effects model, which takes into account both within-study and between-study variabilities.<sup>16</sup> When  
51 some studies included in our meta-analysis used different measurement units (eg, grams per day or  
52 portions per day or servings per day),<sup>5,10,15</sup> we standardized fruit and vegetables intake into  
53 servings per day using a standard portion size of 106 g.<sup>17</sup> As different studies might use different  
54 exposure categories (thirds, quarters, or fifths),<sup>7,11,15</sup> we used the study specific relative risk for the  
55 highest versus lowest category of fruit, vegetables, or fruit and vegetables intake for the  
56  
57  
58  
59  
60

meta-analysis. For the dose-response analysis, the generalized least square for trend estimation method described by Greenland and Longnecker<sup>18</sup> and Orsini et al<sup>19,20</sup> was used to calculate study-specific slopes (linear trends) and 95% confidence intervals. The method requires the distributions of cases and person years for exposure categories, and median/mean of fruit, vegetables, or fruit and vegetables intake levels for each comparison group. We assigned the midpoint of the upper and lower boundaries of each comparison group to determine mean fruit, vegetables, or fruit and vegetables intake levels if the median or mean intake was not provided. When the highest category was open ended, we assumed that the average of the category was set at 1.5 times the lower boundary. Additionally, we first created restricted cubic splines with 4 knots at percentiles 5%, 35%, 65%, and 95% of the distribution.<sup>21</sup> A P value for nonlinearity was calculated by testing the null hypothesis that the coefficient of the fractional polynomials component is equal to zero. Heterogeneity among studies was evaluated using the chi-square test based on Cochran's Q test and  $I^2$  statistic at  $P < 0.10$  level of significance,<sup>16</sup> and quantification of heterogeneity was made by the  $I^2$  metric, which describes the percentage of total variation in point estimates that is due to heterogeneity rather than chance.<sup>22</sup> We considered low, moderate, and high degrees of heterogeneity to be  $I^2$  values of 25%, 50%, and 75%, respectively. To explore possible explanations for heterogeneity and to test the robustness of the association, we conducted subgroup analyses based on the location (Asia v Non-Asia), the quality of the study (high quality ( $\geq 4$ ) v lower quality ( $< 4$ ), length of follow-up ( $\geq 10$  years v  $< 10$  years), sex (male and female included v female only v male only), fractions of intake (thirds, quarters, or fifths), number of participants ( $\geq 50000$  v  $< 50000$ ), and number of cases ( $\geq 1000$  v  $< 1000$ ). We also performed the Begg rank correlation test and Egger's regression test to visualize a possible asymmetry.<sup>23-25</sup> All the statistical analyses were performed in Stata 12 (Stata Corp, College Station, TX). A threshold of  $P < 0.1$  was used to decide whether heterogeneity or publication bias was present.<sup>24</sup> In other ways, P values were 2-sided and  $P < 0.05$  was considered statistically significant.

## Results

### Literature search

Fig 1 shows the results of literature research and selection. We identified 308 articles from PubMed and 365 articles from Embase. After exclusion of duplicate records and studies that did not fulfill our inclusion criteria, 27 articles remained, and we further evaluated the full texts of these 27 publications. Of these, we excluded 17 studies as follows. Five articles were excluded owing to lack of sufficient data for estimation of relative risks.<sup>26-30</sup> Five articles were excluded because no original data could be extracted (review, type 1 diabetes, or cross sectional studies).<sup>31-35</sup> Another four articles were excluded because we deemed irrelevant.<sup>36-39</sup> We also excluded three articles because they did not give enough details on fruits, vegetables, or fruit and vegetables intake to warrant inclusion within the meta-analysis.<sup>40-42</sup> Finally, eleven articles met the inclusion criteria and were included in the meta-analysis.<sup>5,7,10,11,15,43-47</sup> Among these ten articles, Ford et al and Kurotani et al study examined male and female separately,<sup>7,11</sup> Cooper et al have two studies (study a:2012 and study b:2012) and Muraki et al report included data from two independent cohorts.<sup>15</sup> Thus, our meta-analysis included thirteen comparisons.

### Study characteristics

Supplemental tables A and B in appendix 1 show the characteristics and main outcomes extracted from the included studies, all ten articles were prospective cohort designs and participants who

1  
2  
3 were free of self reported diabetes at baseline.<sup>5,7,10,11,15,43-47</sup> In aggregate, the included studies  
4 consisted of 434 342 participants. Among the participants, we documented 24 013 cases of T2D  
5 occurred during follow-up periods ranging from 4.6 to 23 years (median of 11 years). Among 10  
6 articles, five cohorts were conducted primarily in the United States,<sup>11,15,43,44,47</sup> two articles were  
7 done in Asian countries (China and Japan)<sup>7,46</sup> and three cohorts were from European  
8 countries.<sup>5,10,45</sup> The number of participants ranged from 3704 in the EPIC-Norfolk study by  
9 Cooper et al<sup>10</sup> to 91 246 in the Nurses' Health Study II by Muraki et al.<sup>11</sup> Five studies included  
10 both male and female,<sup>5,7,10,15,45</sup> four studies included only female.<sup>43,44,46,47</sup> One article by Muraki et  
11 al reported two independent cohorts, one cohorts included only female, and another only male.<sup>11</sup>  
12 The age of participants ranged from 24 to 79 years. Six papers provided information on fruit and  
13 vegetables intake separately and combined.<sup>5,7,10,43,44,47</sup> two papers provided information on fruit  
14 and vegetables intake separately,<sup>45,46</sup> one paper provided only the combined data,<sup>15</sup> and another  
15 paper provided separate data on fruit.<sup>11</sup> Five papers also included separate data on the intake of  
16 GLV.<sup>5,7,44-46</sup> In most papers intake of fruit and vegetables was divided into fifths.<sup>11,43-47</sup> All studies  
17 provided adjusted risk estimates, results of study quality assessment (score 0-6) showed that most  
18 studies yielded a score of 3 or below (low quality).

### 19 **Fruit intake and risk of T2D**

20 11 comparisons from nine studies reported an association between fruit intake and risk of T2D,  
21 with 22 995 T2D outcomes and 424 677 participants. Overall, fruit intake was inversely  
22 associated with risk (relative risk 0.93, 95% confidence interval 0.88 to 0.99) (fig 2). We saw no  
23 heterogeneity among studies ( $P=0.477$ ,  $I^2=0\%$ ). Additionally, no evidence of substantial  
24 publication bias was observed from the Begg ( $P=0.533$ ) and Egger regression tests ( $P=0.849$ ) (see  
25 supplemental table B in appendix 1). Among 11 comparisons, seven comparisons were eligible for  
26 the dose-response analysis of fruit intake and risk of T2D. Using a restricted cubic splines model,  
27 we found a mild curvilinear association ( $P=0.059$  for non-linearity, fig 3). Dose-response analysis  
28 indicated that a 1 serving/day increment of fruit intake was associated with 6% lower risk of T2D  
29 (relative risk 0.94, 95% confidence interval 0.89 to 1.00,  $I^2=0\%$ ) (see supplemental fig A in  
30 appendix 2).

### 31 **Vegetables intake and risk of T2D**

32 Eight studies reported an association between vegetables intake and risk of T2D, with 20 933  
33 T2D outcomes and 290 927 participants. Using a random effects model summarizing all 9  
34 comparisons, we found no association between vegetables intake and risk (relative risk 0.90, 95%  
35 confidence interval 0.80 to 1.01) (fig 4). There was moderate study heterogeneity ( $P=0.002$ ,  
36  $I^2=66.5\%$ ). However, no evidence of substantial publication bias was observed from the Begg  
37 ( $P=0.602$ ) and Egger regression tests ( $P=0.176$ ) (see supplemental table B in appendix 1). Among  
38 9 comparisons, five comparisons were eligible for the trend estimation. Dose-response analysis  
39 found no association with risk of T2D per 1 serving/day increment of vegetables intake (relative  
40 risk 0.98, 95% confidence interval 0.89 to 1.08,  $I^2=45.8\%$ ) (see supplemental fig B in appendix 2).  
41 No publication bias was observed ( $P=0.117$ ). We found no evidence of a curve linear association  
42 between vegetables intake and risk ( $P=0.671$  for non-linearity, see supplemental fig C in appendix  
43 2).

### 44 **Fruit and vegetables intake and risk of T2D**

45 Information on fruit and vegetables intake and T2D were available in 9 comparisons from seven  
46 prospective studies, totalling 20 672 T2D outcomes and 232 097 participants. Overall, fruit and  
47  
48  
49  
50  
51  
52  
53  
54  
55  
56  
57  
58  
59  
60

1  
2  
3  
4  
5  
6  
7  
8  
9  
10  
11  
12  
13  
14  
15  
16  
17  
18  
19  
20  
21  
22  
23  
24  
25  
26  
27  
28  
29  
30  
31  
32  
33  
34  
35  
36  
37  
38  
39  
40  
41  
42  
43  
44  
45  
46  
47  
48  
49  
50  
51  
52  
53  
54  
55  
56  
57  
58  
59  
60

vegetables intake was not associated with risk (relative risk 0.94, 95% confidence interval 0.86 to 1.03) (see supplemental fig D in appendix 2). We saw no heterogeneity among studies ( $P=0.141$ ,  $I^2=34.6\%$ ). Additionally, no evidence of substantial publication bias was observed from the Begg ( $P=0.348$ ) and Egger regression tests ( $P=0.609$ ) (see supplemental table B in appendix 1). Among 9 comparisons, six comparisons were eligible for the dose-response analysis of fruit and vegetables intake and risk of T2D. We did not find a significant curvilinear association ( $P=0.456$  for non-linearity, see supplemental fig E in appendix 2). Dose-response analysis indicated that a 1 serving/day increment of fruit and vegetables intake (relative risk 0.96, 95% confidence interval 0.86 to 1.07,  $I^2=47.6\%$ ) (see supplemental fig F in appendix 2).

#### **GLV intake and risk of T2D**

7 comparisons from six studies reported an association between GLV intake and risk of T2D, with 19 139 T2D outcomes and 251 235 participants. Overall, GLV intake was inversely associated with risk (relative risk 0.87, 95% confidence interval 0.81 to 0.93) (fig 5). No significant heterogeneity was detected among studies ( $P=0.496$ ,  $I^2=0\%$ ). Additionally, we did not observe evidence of substantial publication bias (the Begg and Egger regression tests,  $P=0.133$  and  $P=0.101$ , respectively) (see supplemental table B in appendix 1). Among 7 comparisons, only three comparisons were eligible for the trend estimation. Using a restricted cubic splines model, we found a significant curvilinear association ( $P=0.036$  for non-linearity, fig 6). Dose-response analysis indicated that a 0.2 serving/day increment of GLV intake was associated with 13% lower risk of T2D (relative risk 0.87, 95% confidence interval 0.76 to 0.99,  $I^2=20.9\%$ ) (see supplemental fig G in appendix 2). No publication bias was observed ( $P=0.282$ ).

#### **Subgroup analyses**

To examine the stability of the primary results, we carried out subgroup analyses (table 1). The association between fruit, vegetables, or fruit and vegetables intake and risk of T2D were similar in subgroup analyses, which were separately defined study quality, length of follow-up, sex, location, number of cases or participants, and whether the different ways in which authors had grouped intake (thirds, quarters, or fifths) affected the results. The summary estimates of relative risks from each category were pooled (see supplemental table B in appendix 1). We paid close attention to the highest versus lowest category. Almost all subgroups that analysed intake of GLV showed a benefit of consuming greater quantities (fig 5). Supplemental table B in appendix 1 also showed significant reductions in risk of T2D events for consumption of fruit, vegetables, or fruit and vegetables combined.

#### **Discussion**

In this meta-analysis dietary intake of fruit, vegetables, and GLV, but not fruit and vegetables combined, were associated with a lower risk of T2D. Dose-response analyses indicated a 6% lower risk of T2D per 1 serving/day increment of fruit intake and 13% lower risk of T2D per 0.2 serving/day increment of GLV intake, but no significant trend for vegetables or fruit and vegetables combined.

#### **Results in relation to other studies**

Over the past decades, extensive prospective studies have reported the association of fruit, vegetables, or fruit and vegetables combined with T2D risk.<sup>5,7,10,11,15,43-47</sup> However, the role of dietary factors in T2D is still controversial. Some of the studies failed to find the association between fruit intake or fruit and vegetables combined and risk of T2D.<sup>8,43</sup> However, Bazzano and

1  
2  
3 colleagues analysed data from 11 different U.S. states with 18 years of follow-up and found that  
4 consumption of fruit was associated with a lower hazard of diabetes, whereas no significant  
5 association for total fruit and vegetables consumption.<sup>47</sup> Similar to previous analysis in the Nurses'  
6 Health Study, the results from three prospective longitudinal cohort studies also supported an  
7 inverse association between fruit intake and risk of T2D.<sup>11</sup> But these studies have the potential for  
8 bias due to measurement error. In addition, two cohort studies have suggested an inverse  
9 association between total fruit and vegetables consumption and risk of T2D.<sup>10,15</sup>

10  
11 A few large cohort studies have found an inverse association between vegetables consumption,  
12 especially GLV and risk of T2D.<sup>10,44-46</sup> These findings all agreed with two meta-analyses.<sup>5,9</sup> But  
13 another systematic review based on five cohort studies suggested that there was no protective  
14 association between vegetables intake and T2D.<sup>8</sup>

15  
16 Several plausible biological mechanisms have been proposed to explain abovementioned  
17 association. Fruit and vegetables are rich in fibre,<sup>48</sup> which has been shown to improve insulin  
18 sensitivity and insulin secretion to overcome insulin resistance.<sup>49</sup> However, meta-analyses showed  
19 that fruit and vegetables fibre is inconsistently associated with the risk of T2D.<sup>50</sup> On the other  
20 hand, it may contribute to a decreased incidence of T2D through their low energy density and  
21 glycemic load, and high micronutrient content.<sup>51</sup> In particular, GLV are rich in bioactive  
22 phytochemicals (such as vitamin C and carotenoids), which are known for their antioxidant  
23 properties.<sup>52-54</sup> Antioxidants in fruit and vegetables have been hypothesized to improve insulin  
24 sensitivity and protect against diabetes in several supplementation trials.<sup>55,56</sup> In addition, it also  
25 might reduce the risk of T2D due to the supply of magnesium (Mg), a recent meta-analysis  
26 detected Mg intake to be inversely associated with the risk of T2D.<sup>57</sup> Taking this evidence into  
27 consideration, it appears that the beneficial effects of vegetables, particularly GLV consumption  
28 on the risk of T2D can be mainly explained by antioxidant vitamins and magnesium. The inverse  
29 association may be also mediated through weight gain or obesity which is an established risk  
30 factor for type 2 diabetes. Fruits are low in energy, which would promote the feeling of fullness  
31 and prevent over consumption of energy-dense foods, and resulting in weight loss.<sup>54</sup> Further  
32 investigation is warranted to understand the mechanisms involved in the proposed relation  
33 between fruit, vegetables, or GLV and risk of T2D.

### 34 **Exploration of heterogeneity**

35  
36 Heterogeneity between studies was found, which did not alter much in the subgroup analyses.  
37 There are differences in types of vegetable consumed between Asian (such as China) and  
38 Non-Asian populations. Therefore, within the subgroup analysis we examined location as a  
39 possible source of heterogeneity. As traditional Chinese diets are high in vegetables (such as GLV  
40 and cruciferous vegetables), unsurprisingly, vegetables (including GLV) intake were greater in  
41 China than the US or Europe. We also examined study quality, length of follow-up, sex, number of  
42 cases or participants, and whether the different ways in which authors had grouped intake (thirds,  
43 quarters, or fifths) as possible sources of heterogeneity, these did not show any significant  
44 heterogeneity between studies. Although the subgroup analysis could not explain the level of  
45 heterogeneity, in interpreting the results, several differences between the studies are worth  
46 discussing.

47  
48 Assessment methods of fruit, vegetables, or fruit and vegetables combined consumption differed  
49 between the studies. Most epidemiological studies used the food frequency questionnaires (FFQs)  
50 to assess quantity of fruit, vegetables, or fruit and vegetables combined intake.<sup>7,10,11,43,44,46,47</sup> It is  
51  
52  
53  
54  
55  
56  
57  
58  
59  
60



1  
2  
3 less suitable for the assessment of absolute intake, which they tend to overestimate.<sup>58,59</sup> However,  
4 two studies collected data via a single 24 hour recall and dietary history interviews,  
5 respectively.<sup>15,45</sup> These measurements may underestimate true associations between fruit,  
6 vegetables, or fruit and vegetables combined consumption and risk of T2D. In addition,  
7 calculations of daily consumption were differed (such as servings per week, servings per day, or  
8 grams per day). Although we standardized primary data using a standard portion size of 106g,  
9 conclusions should be interpreted with caution. Another possible explanation for the differences  
10 between the studies might be the classification of food groups. GLVs' criteria was inconsistent:  
11 three studies included spinach and lettuce; one included spinach and greens; others did not provide  
12 specific description. If they were included with an uniform definition of each groups, the  
13 associations might differ.

### 14 **Strengths and limitations**

15 Compared with the previous meta-analyses,<sup>5,8,9</sup> our study has several strengths. To our knowledge,  
16 this is the largest systematic review and meta-analysis on the intake of fruit and vegetables and  
17 risk of T2D. In addition, to examine the shape of these possible associations, we investigated a  
18 dose-response relation between fruit, vegetables, fruit and vegetables combined consumption and  
19 risk of T2D. Therefore, the results should be more reliable.

20 In interpreting the results, several limitations of this meta-analysis should also be acknowledged.  
21 Firstly, although in the multivariable analysis we considered a multitude of lifestyle and dietary  
22 factors. The possibility of residual confounding or confounding by unmeasured factors, which  
23 cannot be ruled out in any observational study, must be acknowledged. Second, we cannot exclude  
24 the possibility of recall bias in the assessments of diet based on the FFQs. However, the  
25 prospective study design and exclusion of participants with chronic diseases at baseline should  
26 minimize such bias. Third, the noticeable limitation of our study was the potential for bias due to  
27 inevitable measurement error, especially for individual with lower consumption levels. We  
28 attempted to reduce measurement error in adjusting for energy intake and using of cumulatively  
29 averaged intake levels. Fourth, because we had no source of information other than questionnaire  
30 for the identification of T2D, we might have underestimated the incidence of T2D. In addition,  
31 subclinical diseases at baseline might have distorted our risk estimate to some extent. Finally, the  
32 possible limitation is due to language bias. We attempted to minimize this bias by searching major  
33 electronic databases with no language restriction. However, several articles published in  
34 non-English languages might not appear in international journal databases, and could be omitted  
35 by our searches.<sup>60</sup>

### 36 **Conclusions**

37 In summary, our meta-analysis suggests that higher fruit or GLV intake is associated with a  
38 significantly reduced risk of T2D. In addition, the dose-response relations also indicate that  
39 relatively high fruit or GLV may still decrease risk of T2D. Further evidence from preferably  
40 randomized controlled studies should explore what kind of fruit or GLV can reduce the risk of  
41 T2D.  
42  
43  
44  
45  
46  
47  
48  
49  
50  
51  
52  
53  
54  
55  
56  
57  
58  
59  
60

1  
2  
3  
4  
5  
6  
7  
8  
9  
10  
11  
12  
**Contributors:** ML and ZT conceived and designed the study. ML and YF searched the databases and checked them according to the eligible criteria and exclusion criteria. ZT helped develop search strategies. XZ and WH extract quantitative data. YF, XZ, and WH analyzed the data. ML wrote the draft of the paper. All authors contributed to writing, reviewing, or revising the paper. ZT is the guarantor.

13  
14  
**Funding:** This work was not funded by any foundation or program.

15  
16  
17  
18  
19  
20  
21  
22  
**Competing interests:** All authors have completed the ICMJE uniform disclosure form at [www.icmje.org/coi\\_disclosure.pdf](http://www.icmje.org/coi_disclosure.pdf) (available on request from the corresponding author) and declare: no support from any organization for the submitted work; no financial relationships with any organizations that might have an interest in the submitted work in the previous three years; no other relationships or activities that could appear to have influenced the submitted work.

23  
24  
**Ethical approval:** Not required.

25  
26  
**Data sharing:** No additional data available.

#### 27 28 **Figures Information**

29  
30  
**Figure 1. Process of literature search and study selection.**

31  
32  
(TIFF)

33  
34  
**Figure 2. Random effects analysis of fully adjusted studies for highest versus lowest intake of fruit and risk of type 2 diabetes.**

35  
36  
(TIFF)

37  
38  
**Figure 3. Dose-response analyses of fruit intake and risk of type 2 diabetes.**

39  
40  
(TIFF)

41  
42  
**Figure 4. Random effects analysis of fully adjusted studies for highest versus lowest intake of vegetables and risk of type 2 diabetes.**

43  
44  
(TIFF)

45  
46  
**Figure 5. Random effects analysis of fully adjusted studies for highest versus lowest intake of green leafy vegetables and risk of type 2 diabetes.**

47  
48  
(TIFF)

49  
50  
**Figure 6. Dose-response analyses of green leafy vegetables intake and risk of type 2 diabetes.**

51  
52  
(TIFF)

#### 53 54 **Appendix figure information**

55  
56  
**Supplemental fig A. Forest plot of fruit intake and risk of type 2 diabetes.**



1  
2  
3 (TIFF)  
4

5 **Supplemental fig B. Forest plot of vegetables intake and risk of type 2 diabetes.**

6 (TIFF)  
7  
8

9 **Supplemental fig C. Dose-response analyses of vegetables intake and risk of type 2 diabetes.**

10 (TIFF)  
11

12 **Supplemental fig D. Random effects analysis of fully adjusted studies for highest versus**  
13 **lowest intake of fruit and vegetables and risk of type 2 diabetes.**

14 (TIFF)  
15  
16

17 **Supplemental fig E. Dose-response analyses of fruit and vegetables intake and risk of type 2**  
18 **diabetes.**

19 (TIFF)  
20  
21

22 **Supplemental fig F. Forest plot of fruit and vegetables intake and risk of type 2 diabetes.**

23 (TIFF)  
24  
25

26 **Supplemental fig G. Forest plot of green leafy vegetables intake and risk of type 2 diabetes.**

27 (TIFF)  
28  
29  
30  
31  
32  
33  
34  
35  
36  
37  
38  
39  
40  
41  
42  
43  
44  
45  
46  
47  
48  
49  
50  
51  
52  
53  
54  
55  
56  
57  
58  
59  
60

- 1 Shaw JE, Sicree RA, Zimmet PZ. Global estimates of the prevalence of diabetes for 2010 and 2030. *Diabetes Res Clin Pract* 2010;87:4-14.
- 2 Jonsson B. Revealing the cost of Type II diabetes in Europe. *Diabetologia* 2002;45:S5-12.
- 3 Zhang P, Zhang X, Brown J, et al. Global healthcare expenditure on diabetes for 2010 and 2030. *Diabetes Res Clin Pract* 2010;87:293-301.
- 4 Gillies CL, Abrams KR, Lambert PC, et al. Pharmacological and lifestyle interventions to prevent or delay type 2 diabetes in people with impaired glucose tolerance: systematic review and meta-analysis. *BMJ* 2007;334:299.
- 5 Cooper AJ, Forouhi NG, Ye Z, et al. Fruit and vegetable intake and type 2 diabetes: EPIC-InterAct prospective study and meta-analysis. *Eur J Clin Nutr* 2012;66:1082-92.
- 6 World Health Organization/UN Food and Agriculture Organization. *Diet, Nutrition and the Prevention of Chronic Diseases: Report of a Joint FAO/WHO Expert Consultation*. Geneva, World Health Org., 2003 (Tech. Rep. Ser., no. 916).
- 7 Kurotani K, Nanri A, Goto A, et al. Vegetable and fruit intake and risk of type 2 diabetes: Japan Public Health Center-based Prospective Study. *Br J Nutr* 2013;109:709-17.
- 8 Hamer M, Chida Y. Intake of fruit, vegetables, and antioxidants and risk of type 2 diabetes: systematic review and meta-analysis. *J Hypertens* 2007;25:2361-9.
- 9 Carter P, Gray LJ, Troughton J, et al. Fruit and vegetable intake and incidence of type 2 diabetes mellitus: systematic review and meta-analysis. *BMJ* 2010;341:c4229.
- 10 Cooper AJ, Sharp SJ, Lentjes MA, et al. A prospective study of the association between quantity and variety of fruit and vegetable intake and incident type 2 diabetes. *Diabetes Care* 2012;35:1293-300.
- 11 Muraki I, Imamura F, Manson JE, et al. Fruit consumption and risk of type 2 diabetes: results from three prospective longitudinal cohort studies. *BMJ* 2013;347:f5001.
- 12 Stroup DF, Berlin JA, Morton SC, et al. Meta-analysis of observational studies in epidemiology: a proposal for reporting. Meta-analysis Of Observational Studies in Epidemiology (MOOSE) group. *JAMA* 2000;283:2008-12.
- 13 Wong WC, Cheung CS, Hart GJ. Development of a quality assessment tool for systematic reviews of observational studies (QATSO) of HIV prevalence in men having sex with men and associated risk behaviours. *Emerg Themes Epidemiol* 2008;5:23.
- 14 von EE, Altman DG, Egger M, et al. The Strengthening the Reporting of Observational Studies in Epidemiology (STROBE) statement: guidelines for reporting observational studies. *Prev Med* 2007;45:247-51.
- 15 Ford ES, Mokdad AH. Fruit and vegetable consumption and diabetes mellitus incidence among U.S. adults. *Prev Med* 2001;32:33-9.
- 16 DerSimonian R, Laird N. Meta-analysis in clinical trials. *Control Clin Trials* 1986;7:177-88.
- 17 Dauchet L, Amouyel P, Hercberg S, et al. Fruit and vegetable consumption and risk of coronary heart disease: a meta-analysis of cohort studies. *J Nutr* 2006;136:2588-93.
- 18 Greenland S, Longnecker MP. Methods for trend estimation from summarized dose-response data, with applications to meta-analysis. *Am J Epidemiol* 1992;135:1301-9.
- 19 Orsini N, Bellocco R, Greenland S. Generalized least squares for trend estimation of summarized dose-response data. *Stata Journal* 2006;6:40-57.

- 1  
2  
3 20 Orsini N, Li R, Wolk A, et al. Meta-analysis for linear and nonlinear dose-response relations:  
4 examples, an evaluation of approximations, and software. *Am J Epidemiol* 2012;175:66-73.  
5  
6 21 Harrell FE Jr, Lee KL, Pollock BG. Regression models in clinical studies: determining  
7 relationships between predictors and response. *J Natl Cancer Inst* 1988;80:1198-202.  
8  
9 22 Higgins JP, Thompson SG, Deeks JJ, et al. Measuring inconsistency in meta-analyses. *BMJ*  
10 2003;327:557-60.  
11  
12 23 Begg CB, Mazumdar M. Operating characteristics of a rank correlation test for publication bias.  
13 *Biometrics* 1994;50:1088-101.  
14  
15 24 Egger M, Davey SG, Schneider M, et al. Bias in meta-analysis detected by a simple, graphical  
16 test. *BMJ* 1997;315:629-34.  
17  
18 25 Peters JL, Sutton AJ, Jones DR, et al. Contour-enhanced meta-analysis funnel plots help  
19 distinguish publication bias from other causes of asymmetry. *J Clin Epidemiol* 2008;61:991-6.  
20  
21 26 Bauer F, Beulens JW, van der A DL, Wijmenga C, Grobbee DE, Spijkerman AM, et al. Dietary  
22 patterns and the risk of type 2 diabetes in overweight and obese individuals. *Eur J Nutr*  
23 2013;52:1127-34.  
24  
25 27 Eshak ES, Iso H, Mizoue T, et al. Soft drink, 100% fruit juice, and vegetable juice intakes and  
26 risk of diabetes mellitus. *Clin Nutr* 2013;32:300-8.  
27  
28 28 von RA, Feller S, Bergmann MM, et al. Diet and risk of chronic diseases: results from the  
29 first 8 years of follow-up in the EPIC-Potsdam study. *Eur J Clin Nutr* 2013;67:412-9.  
30  
31 29 Yu R, Woo J, Chan R, Sham A, et al. Relationship between dietary intake and the development  
32 of type 2 diabetes in a Chinese population: the Hong Kong Dietary Survey. *Public Health Nutr*  
33 2011;14:1133-41.  
34  
35 30 Morimoto A, Ohno Y, Tatsumi Y, et al. Effects of healthy dietary pattern and other lifestyle  
36 factors on incidence of diabetes in a rural Japanese population. *Asia Pac J Clin Nutr*  
37 2012;21:601-8.  
38  
39 31 Martinez-Gonzalez MA, de la Fuente-Arrillaga C, et al. Benito S, Ruiz-Canela M. Low  
40 consumption of fruit and vegetables and risk of chronic disease: a review of the  
41 epidemiological evidence and temporal trends among Spanish graduates. *Public Health Nutr*  
42 2011;14:2309-15.  
43  
44 32 Esposito K, Kastorini CM, Panagiotakos DB, et al. Prevention of type 2 diabetes by dietary  
45 patterns: a systematic review of prospective studies and meta-analysis. *Metab Syndr Relat*  
46 *Disord* 2010;8:471-6.  
47  
48 33 Lodefalk M, Aman J. Food habits, energy and nutrient intake in adolescents with Type 1  
49 diabetes mellitus. *Diabet Med* 2006;23:1225-32.  
50  
51 34 Zhu Y, Zhang Y, Ling W, et al. Fruit consumption is associated with lower carotid  
52 intima-media thickness and C-reactive protein levels in patients with type 2 diabetes mellitus.  
53 *J Am Diet Assoc* 2011;111:1536-42.  
54  
55 35 Hosseinpour-Niazi S, Mirmiran P, Sohrab G, et al. Inverse association between fruit, legume,  
56 and cereal fiber and the risk of metabolic syndrome: Tehran Lipid and Glucose Study.  
57 *Diabetes Res Clin Pract* 2011;94:276-83.  
58  
59 36 Odegaard AO, Koh WP, Arakawa K, et al. Soft drink and juice consumption and risk of  
60 physician-diagnosed incident type 2 diabetes: the Singapore Chinese Health Study. *Am J*  
*Epidemiol* 2010;171:701-8.
- 37 Hodge AM, English DR, O'Dea K, et al. Dietary patterns and diabetes incidence in the

- Melbourne Collaborative Cohort Study. *Am J Epidemiol* 2007;165:603-10.
- 38 Cai H, Shu XO, Gao YT, Li H, Yang G, Zheng W. A prospective study of dietary patterns and mortality in Chinese women. *Epidemiology* 2007;18:393-401.
- 39 Sartorelli DS, Cardoso MA. [Association between dietary carbohydrates and type 2 diabetes mellitus: epidemiological evidence]. *Arq Bras Endocrinol Metabol* 2006;50:415-26.
- 40 Erber E, Hopping BN, Grandinetti A, Park SY, Kolonel LN, Maskarinec G. Dietary patterns and risk for diabetes: the multiethnic cohort. *Diabetes Care* 2010;33:532-8.
- 41 Sluijs I, Beulens JW, van der A DL, et al. Dietary intake of total, animal, and vegetable protein and risk of type 2 diabetes in the European Prospective Investigation into Cancer and Nutrition (EPIC)-NL study. *Diabetes Care* 2010;33:43-8.
- 42 Liese AD, Weis KE, Schulz M, et al. Food intake patterns associated with incident type 2 diabetes: the Insulin Resistance Atherosclerosis Study. *Diabetes Care* 2009;32:263-8.
- 43 Meyer KA, Kushi LH, Jacobs DR Jr, et al. Carbohydrates, dietary fiber, and incident type 2 diabetes in older women. *Am J Clin Nutr* 2000;71:921-30.
- 44 Liu S, Serdula M, Janket SJ, et al. A prospective study of fruit and vegetable intake and the risk of type 2 diabetes in women. *Diabetes Care* 2004;27:2993-6.
- 45 Montonen J, Jarvinen R, Heliövaara M, et al. Food consumption and the incidence of type II diabetes mellitus. *Eur J Clin Nutr* 2005;59:441-8.
- 46 Villegas R, Shu XO, Gao YT, Yang G, Elasy T, Li H, et al. Vegetable but not fruit consumption reduces the risk of type 2 diabetes in Chinese women. *J Nutr* 2008;138:574-80.
- 47 Bazzano LA, Li TY, Joshipura KJ, et al. Intake of fruit, vegetables, and fruit juices and risk of diabetes in women. *Diabetes Care* 2008;31:1311-7.
- 48 McKee LH, Latner TA. Underutilized sources of dietary fiber: a review. *Plant Foods Hum Nutr* 2000;55:285-304.
- 49 Liese AD, Roach AK, Sparks KC, et al. Whole-grain intake and insulin sensitivity: the Insulin Resistance Atherosclerosis Study. *Am J Clin Nutr* 2003;78:965-71.
- 50 Schulze MB, Schulz M, Heidemann C, Schienkiewitz A, Hoffmann K, Boeing H. Fiber and magnesium intake and incidence of type 2 diabetes: a prospective study and meta-analysis. *Arch Intern Med* 2007;167:956-65.
- 51 Jenkins DJ, Wolever TM, Buckley G, et al. Low-glycemic-index starchy foods in the diabetic diet. *Am J Clin Nutr* 1988;48:248-54.
- 52 Tarwadi K, Agte V. Potential of commonly consumed green leafy vegetables for their antioxidant capacity and its linkage with the micronutrient profile. *Int J Food Sci Nutr* 2003;54:417-25.
- 53 Hozawa A, Jacobs DR Jr, Steffes MW, et al. Associations of serum carotenoid concentrations with the development of diabetes and with insulin concentration: interaction with smoking: the Coronary Artery Risk Development in Young Adults (CARDIA) Study. *Am J Epidemiol* 2006;163:929-37.
- 54 Harding AH, Wareham NJ, Bingham SA, et al. Plasma vitamin C level, fruit and vegetable consumption, and the risk of new-onset type 2 diabetes mellitus: the European prospective investigation of cancer--Norfolk prospective study. *Arch Intern Med* 2008;168:1493-9.
- 55 Liu S, Ajani U, Chae C, Hennekens C, et al. Long-term beta-carotene supplementation and risk of type 2 diabetes mellitus: a randomized controlled trial. *JAMA* 1999;282:1073-5.
- 56 Ceriello A, Motz E. Is oxidative stress the pathogenic mechanism underlying insulin resistance,

- 1  
2  
3 diabetes, and cardiovascular disease? The common soil hypothesis revisited. *Arterioscler*  
4 *Thromb Vasc Biol* 2004;24:816-23.
- 5 57 Larsson SC, Wolk A. Magnesium intake and risk of type 2 diabetes: a meta-analysis. *J Intern*  
6 *Med* 2007;262:208-14.
- 7  
8 58 Feskanich D, Rimm EB, Giovannucci EL, et al. Reproducibility and validity of food intake  
9 measurements from a semiquantitative food frequency questionnaire. *J Am Diet Assoc*  
10 1993;93:790-6.
- 11  
12 59 Bingham SA, Welch AA, McTaggart A et al. Nutritional methods in the European Prospective  
13 Investigation of Cancer in Norfolk. *Public Health Nutr* 2001;4:847-58.
- 14  
15 60 Li M, Hou W, Zhang X, Hu L, et al. Hyperuricemia and risk of stroke: a systematic review and  
16 meta-analysis of prospective studies. *Atherosclerosis* 2014;232:265-70.
- 17  
18  
19  
20  
21  
22  
23  
24  
25  
26  
27  
28  
29  
30  
31  
32  
33  
34  
35  
36  
37  
38  
39  
40  
41  
42  
43  
44  
45  
46  
47  
48  
49  
50  
51  
52  
53  
54  
55  
56  
57  
58  
59  
60

**Table 1. Subgroup analyses to investigate differences between studies included in meta-analysis (highest versus lowest category)**

| Variables                     | Fruit only |                     |         | Vegetables only |                     |         | Fruit and vegetables |                     |         | Green leafy vegetables |                     |         |
|-------------------------------|------------|---------------------|---------|-----------------|---------------------|---------|----------------------|---------------------|---------|------------------------|---------------------|---------|
|                               | No         | Pooled RR (95% CI)  | P value | No              | Pooled RR (95% CI)  | P value | No                   | Pooled RR (95% CI)  | P value | No                     | Pooled RR (95% CI)  | P value |
| Location                      |            |                     |         |                 |                     |         |                      |                     |         |                        |                     |         |
| Non-Asia                      | 8          | 0.93 (0.87 to 1.00) | 0.049   | 6               | 0.96 (0.87 to 1.06) | 0.397   | 7                    | 0.94 (0.84 to 1.04) | 0.223   | 4                      | 0.89 (0.81 to 0.97) | 0.012   |
| Asia                          | 3          | 0.96 (0.82 to 1.12) | 0.584   | 3               | 0.77 (0.60 to 0.98) | 0.032   | 2                    | 0.97 (0.75 to 1.25) | 0.827   | 3                      | 0.80 (0.69 to 0.93) | 0.004   |
| Quality                       |            |                     |         |                 |                     |         |                      |                     |         |                        |                     |         |
| High ( $\geq 4$ )             | 4          | 0.92 (0.86 to 1.00) | 0.045   | 2               | 0.83 (0.52 to 1.33) | 0.448   | 1                    | 1.04 (0.87 to 1.25) | 0.671   | 2                      | 0.86 (0.76 to 0.98) | 0.024   |
| Low ( $< 4$ )                 | 7          | 0.94 (0.85 to 1.04) | 0.240   | 7               | 0.93 (0.84 to 1.02) | 0.109   | 8                    | 0.93 (0.84 to 1.02) | 0.138   | 5                      | 0.86 (0.77 to 0.97) | 0.010   |
| Duration of follow-up (years) |            |                     |         |                 |                     |         |                      |                     |         |                        |                     |         |
| $\geq 10$                     | 5          | 0.90 (0.83 to 0.97) | 0.006   | 4               | 0.91 (0.79 to 1.05) | 0.190   | 5                    | 0.89 (0.77 to 1.02) | 0.098   | 3                      | 0.85 (0.75 to 0.97) | 0.014   |
| $< 10$                        | 6          | 0.98 (0.90 to 1.07) | 0.654   | 5               | 0.89 (0.72 to 1.10) | 0.296   | 4                    | 1.03 (0.91 to 1.16) | 0.674   | 4                      | 0.87 (0.78 to 0.97) | 0.013   |
| Sex                           |            |                     |         |                 |                     |         |                      |                     |         |                        |                     |         |
| M and F                       | 5          | 0.88 (0.79 to 0.98) | 0.022   | 5               | 0.89 (0.81 to 0.97) | 0.010   | 6                    | 0.87 (0.77 to 0.98) | 0.026   | 4                      | 0.80 (0.69 to 0.92) | 0.002   |
| F only                        | 5          | 0.95 (0.88 to 1.02) | 0.168   | 4               | 0.94 (0.77 to 1.15) | 0.544   | 3                    | 1.02 (0.94 to 1.11) | 0.610   | 3                      | 0.89 (0.81 to 0.98) | 0.014   |
| M only                        | 1          | 0.99 (0.82 to 1.19) | 0.916   | 0               | -                   | -       | 0                    | -                   | -       | 0                      | -                   | -       |
| Fractions of distribution     |            |                     |         |                 |                     |         |                      |                     |         |                        |                     |         |
| Thirds                        | 1          | 0.91 (0.71 to 1.16) | 0.451   | 1               | 0.94 (0.84 to 1.05) | 0.277   | 1                    | 0.90 (0.80 to 1.01) | 0.076   | 1                      | 0.84 (0.65 to 1.08) | 0.170   |
| Quarters                      | 3          | 0.92 (0.81 to 1.04) | 0.193   | 3               | 0.77 (0.60 to 0.98) | 0.032   | 2                    | 0.97 (0.75 to 1.25) | 0.827   | 3                      | 0.80 (0.69 to 0.93) | 0.004   |
| Fifths                        | 7          | 0.94 (0.87 to 1.02) | 0.144   | 5               | 0.96 (0.84 to 1.09) | 0.499   | 6                    | 0.94 (0.82 to 1.08) | 0.385   | 3                      | 0.89 (0.78 to 1.01) | 0.062   |
| No of participants            |            |                     |         |                 |                     |         |                      |                     |         |                        |                     |         |
| $\geq 50000$                  | 3          | 0.91 (0.84 to 0.99) | 0.032   | 2               | 0.83 (0.52 to 1.33) | 0.448   | 1                    | 1.01 (0.91 to 1.13) | 0.858   | 2                      | 0.86 (0.76 to 0.98) | 0.024   |
| $< 50000$                     | 8          | 0.95 (0.87 to 1.04) | 0.237   | 7               | 0.93 (0.84 to 1.02) | 0.109   | 8                    | 0.92 (0.83 to 1.03) | 0.146   | 5                      | 0.86 (0.77 to 0.97) | 0.010   |
| No of cases                   |            |                     |         |                 |                     |         |                      |                     |         |                        |                     |         |
| $\geq 1000$                   | 5          | 0.95 (0.88 to 1.03) | 0.233   | 4               | 1.01 (0.94 to 1.08) | 0.810   | 6                    | 0.96 (0.86 to 1.07) | 0.456   | 3                      | 0.91 (0.84 to 0.98) | 0.018   |
| $< 1000$                      | 6          | 0.91 (0.82 to 1.00) | 0.042   | 5               | 0.75 (0.66 to 0.85) | 0.000   | 3                    | 0.87 (0.73 to 1.04) | 0.119   | 4                      | 0.78 (0.68 to 0.89) | 0.000   |

M=male, F=female, RR=relative risk.

1  
2  
3  
4 **Fruit and vegetable intake and risk of type 2 diabetes mellitus:**  
5  
6 **meta-analysis of prospective cohort studies**  
7  
8

9 **Min Li** *master student*<sup>1</sup>, **Yingli Fan** *master student*<sup>2</sup>, **Xiaowei Zhang** *master*  
10 *student*<sup>1</sup>, **Wenshang Hou** *master student*<sup>1</sup>, **Zhenyu Tang** *associate professor*<sup>1</sup>  
11

12  
13  
14 <sup>1</sup>Department of Neurology, The Second Affiliated Hospital of Nanchang University, Nanchang  
15 330006, Jiangxi Province, People's Republic of China; <sup>2</sup>Department of Cardiovascular, The  
16 Second Affiliated Hospital of Nanchang University, Nanchang 330006, Jiangxi Province, People's  
17 Republic of China  
18  
19  
20

21 Correspondence to: Z Tang, Department of Neurology, The Second Affiliated Hospital of  
22 Nanchang University, No. 1, Minde Road, Nanchang, Jiangxi 330006, People's Republic of China  
23  
24  
25 zytang07016@sina.com  
26  
27  
28  
29  
30  
31  
32  
33  
34  
35  
36  
37  
38  
39  
40  
41  
42  
43  
44  
45  
46  
47  
48  
49  
50  
51  
52  
53  
54  
55  
56  
57  
58  
59  
60



## Abstract

**Objective** To clarify and quantify the potential dose-response association between the intake of fruit and vegetables and risk of type 2 diabetes.

**Design** Meta-analysis and systematic review of prospective cohort studies.

**Data source** Studies published before February 2014 identified through electronic searches using PubMed and Embase.

**Eligibility criteria for selecting studies** Prospective cohort studies with relative risks and 95% confidence intervals for type 2 diabetes according to the intake of fruit, vegetables, or fruit and vegetables.

**Results** A total of ten articles including thirteen comparisons with 24 013 cases of type 2 diabetes and 434 342 participants were included in the meta-analysis. Evidence of curve linear associations were seen between fruit and green leafy vegetables consumption and risk of type 2 diabetes ( $P=0.059$  and  $P=0.036$  for non-linearity, respectively). The summary relative risk of type 2 diabetes for an increase of 1 serving fruit consumed per day was 0.93 (95% confidence interval 0.88 to 0.99) without heterogeneity among studies ( $P=0.477$ ,  $I^2=0\%$ ). For vegetables, the combined relative risk of type 2 diabetes for an increase of 1 serving consumed per day was 0.90 (95% confidence interval 0.80 to 1.01) with moderate heterogeneity among studies ( $P=0.002$ ,  $I^2=66.5\%$ ). For green leafy vegetables, the summary relative risk of type 2 diabetes for an increase of 0.2 serving consumed per day was 0.87 (95% confidence interval 0.81 to 0.93) without heterogeneity among studies ( $P=0.496$ ,  $I^2=0\%$ ). The combined estimates showed no significant benefits of increasing the consumption of fruit and vegetables combined.

**Conclusions** Higher fruit or green leafy vegetables intake is associated with a significantly reduced risk of type 2 diabetes.

## Article summary

Strengths and limitations of this study

To our knowledge, this is the largest systematic review and meta-analysis on the intake of fruit and vegetables and risk of type 2 diabetes. We also investigated a dose-response relation between fruit, vegetables, fruit and vegetables combined consumption and risk of type 2 diabetes.

The possibility of residual confounding or confounding by unmeasured factors, which cannot be ruled out in any observational study, must be acknowledged. We cannot exclude the possibility of recall bias in the assessments of diet based on the food frequency questionnaires.

1. Health expenditure on type 2 diabetes is increasing worldwide.
2. Epidemiological studies suggest that the intake of fruit and vegetables is beneficial in delaying or preventing the development of type 2 diabetes, though results from cohort studies are controversial.
3. Higher fruit or vegetables, particularly green leafy vegetables intake is associated with a significantly reduced risk of type 2 diabetes.
4. Dose-response analyses indicated a 6% lower risk of type 2 diabetes per 1 serving/day increment of fruit intake and 13% lower risk of type 2 diabetes per 0.2 serving/day increment of green leafy vegetables intake.
5. Further evidence from preferably randomized controlled studies should explore what kind of fruit or green leafy vegetables can reduce the risk of type 2 diabetes.



## Introduction

Type 2 diabetes (T2D) is one of the most common noncommunicable diseases which is expected to affect in excess of 439 million adults worldwide by 2030,<sup>1</sup> with serious consequences for health care expenditure.<sup>2</sup> It has been estimated that the global health expenditure on diabetes is at least \$ 376 billion in 2010 and will be \$ 490 billion in 2030,<sup>3</sup> this creates a major public health burden. The prevention of T2D is thus clearly an important public health priority. In recent decades, concern has mounted regarding the premature mortality and morbidity associated with T2D, with growing interest in altering risk factors and reversing this global epidemic. Among the known risk factors for T2D, dietary factors have aroused particular attention. Lifestyle intervention trials that include dietary modification have been shown to be effective in delaying or preventing the development of T2D.<sup>4</sup> Although the effect of individual components or interactions between nutrients is still largely unknown, fruit and vegetables intake may explain some of this beneficial effect.<sup>5</sup>

To minimize the risk of dietary factors and reduce the incidence of T2D, a World Health Organization recommended the public to consume more than 400 g or five portions of combined fruit and vegetables per day for the prevention of T2D.<sup>6</sup> Nevertheless, in the Japan Public Health Center-based Prospective (JPHC) Study,<sup>7</sup> after a mean follow-up over five years, participants with the intake of fruit and vegetables may not be appreciably associated with the risk of T2D. Vegetables, especially green leafy vegetables (GLV), have been suggested to explain an apparent beneficial effect on T2D. In addition, several meta-analyses of observational studies have found that an increase in daily intake of GLV could significantly reduce the risk of T2D.<sup>5,8,9</sup> These studies were restricted by heterogeneous with respect to sample size. Additionally, recent studies involving relationship between the intake of fruit and vegetables and risk of T2D have been published from then on.<sup>5,7,10,11</sup> Furthermore, whether any dose-response relation exists between the intake of fruit and vegetables and risk of T2D is unknown. Therefore, we systematically reviewed and meta-analysed available studies to quantify the associations between dietary intake of fruit and vegetables and incidence of T2D based on identified prospective cohort studies. We pooled risk estimates for the highest versus lowest category of intake to examine the overall association. We also conducted a dose-response analysis for the trend estimation.

## Methods

### Search strategy

We carried out a systematic search of PubMed (Medline) and Embase through February 2014 for prospective cohort studies examining the association between the intake of fruit and vegetables and risk of T2D. The following key words were used in our search strategies: (“fruits” OR “vegetables” OR “citrus”) AND (“Type 2 diabetes” OR “non-insulin-dependent diabetes mellitus” OR “Diabetes Mellitus, Type 2” OR “NIDDM” OR “prediabetes” OR “impaired glucose tolerance” OR “impaired fasting glucose” OR “glucose” OR “hyperglycaemia” OR “insulin”) AND (“Follow-up studies” OR “prospective studies” OR “cohort studies” OR “longitudinal studies”). We restricted the search to human studies. No language restrictions were imposed. In addition, we scrutinized possible eligible references from relevant original papers and review articles to identify potential publications. We followed standard criteria for the performing and reporting of the meta-analyses of observational studies.<sup>12</sup>

### Study selection

1  
2  
3 Citations selected from the initial search were subsequently screened for eligibility. Studies were  
4 included in this meta-analysis if they satisfied the following criteria: (1) original studies (eg, not  
5 review articles, meeting abstracts, editorials, or commentaries); (2) prospective design (eg, not  
6 cross sectional design, case-control design); (3) the exposure of interest was the intake of fruits,  
7 vegetables, or fruit and vegetables combined; (4) the outcome was T2D; and (5) reported  
8 multivariate-adjusted risk estimates for the association between the fruit, vegetables, or fruit and  
9 vegetables combined, assessed as dietary intake, and T2D. Additionally, we excluded animal  
10 studies and letters without sufficient data. If data were reported more than once, we included the  
11 study with the longest follow-up time.

#### 14 **Validity assessment**

15 Two authors (ML and YF) independently assessed all studies for quality using a modified scoring  
16 system, which allowed a total score from 0 to 6 points (6 reflecting the highest quality) on the  
17 basis of MOOSE,<sup>12</sup> QUATSO,<sup>13</sup> and STROBE.<sup>14</sup> The system was created to account for study  
18 eligibility (1 point for appropriate inclusion and exclusion criteria), outcome (1 point if diagnosis  
19 of T2D was based on accepted clinical criteria, and not solely based on self-report), exposure (1  
20 point if fruit and vegetables consumption were assessed with a validated tool, and 1 point if fruit  
21 and vegetables consumption were appropriately categorized), statistical analysis (1 point was  
22 given if adjustment included a few variables such as age, sex, body mass index, and family history  
23 of T2D, these being proven risk factors for T2D). Another point was given for any other factors  
24 were adjusted (such as alcohol, education, and physical activity). **We have adapted Carter et al's**  
25 **scoring system.**<sup>9</sup>

#### 29 **Data extraction**

30 Data were carried out independently by two other authors (XZ and WH) using a standard  
31 electronic sheets and cross-check to reach a consensus. For each study, the following information  
32 was abstracted: name of the first author, publication year, study population, geographical location,  
33 sex, age range, sample size (number of T2D cases, number of non-T2D cases, and number of  
34 participants), duration of follow-up, methods used to assess fruit and vegetables intake and  
35 ascertain T2D cases, highest and lowest of fruit and vegetables intake, and covariates adjusted for  
36 in the multivariable model. Study quality was evaluated by using the modified scoring system. All  
37 data were extracted from the published papers. If necessary, the primary authors were contacted to  
38 retrieve further information. For two studies that expressed data separately for men and women,<sup>7,15</sup>  
39 one study that included data from multiple cohorts,<sup>11</sup> we considered the analysis for each sex or  
40 cohort as an independent comparison and extracted data separately.

#### 45 **Statistical analysis**

46 Within each study, we used multivariate-adjusted outcome data (expressed as relative risks and  
47 95% confidence intervals) for risk estimates. For the present analyses we assumed hazard ratios to  
48 be a valid approximation of relative risks, we converted these values in every study by taking their  
49 natural logarithms and calculating standard errors and corresponding 95% confidence intervals.  
50 Relative risks and their standard errors were pooled with the DerSimonian and Laird random  
51 effects model, which takes into account both within-study and between-study variabilities.<sup>16</sup> When  
52 some studies included in our meta-analysis used different measurement units (eg, grams per day or  
53 portions per day or servings per day),<sup>5,10,15</sup> we standardized fruit and vegetables intake into  
54 servings per day using a standard portion size of 106 g.<sup>17</sup> As different studies might use different  
55 exposure categories (thirds, quarters, or fifths),<sup>7,11,15</sup> we used the study specific relative risk for the  
56  
57  
58  
59  
60

1  
2  
3 highest versus lowest category of fruit, vegetables, or fruit and vegetables intake for the  
4 meta-analysis. For the dose-response analysis, the generalized least square for trend estimation  
5 method described by Greenland and Longnecker<sup>18</sup> and Orsini et al<sup>19,20</sup> was used to calculate  
6 study-specific slopes (linear trends) and 95% confidence intervals. The method requires the  
7 distributions of cases and person years for exposure categories, and median/mean of fruit,  
8 vegetables, or fruit and vegetables intake levels for each comparison group. **We assigned the  
9 midpoint of the upper and lower boundaries of each comparison group to determine mean fruit,  
10 vegetables, or fruit and vegetables intake levels if the median or mean intake was not available.**<sup>21</sup>  
11 When the highest category was open ended, we assumed that the average of the category was set  
12 at 1.5 times the lower boundary. Additionally, we first created restricted cubic splines with 4 knots  
13 at percentiles 5%, 35%, 65%, and 95% of the distribution.<sup>22</sup> A P value for nonlinearity was  
14 calculated by testing the null hypothesis that the coefficient of the fractional polynomials  
15 component is equal to zero. Heterogeneity among studies was evaluated using the chi-square test  
16 based on Cochran's Q test and I<sup>2</sup> statistic at P<0.10 level of significance,<sup>16</sup> and quantification of  
17 heterogeneity was made by the I<sup>2</sup> metric, which describes the percentage of total variation in point  
18 estimates that is due to heterogeneity rather than chance.<sup>23</sup> We considered low, moderate, and high  
19 degrees of heterogeneity to be I<sup>2</sup> values of 25%, 50%, and 75%, respectively. To explore possible  
20 explanations for heterogeneity and to test the robustness of the association, we conducted  
21 subgroup analyses based on the location (Asia v Non-Asia), the quality of the study (high quality  
22 (≥4) v lower quality (<4), length of follow-up (≥10 years v <10 years), sex (male and female  
23 included v female only v male only), fractions of intake (thirds, quarters, or fifths), number of  
24 participants (≥50000 v <50000), and number of cases (≥1000 v <1000). We performed the  
25 Begg rank correlation test and Egger's regression test to visualize a possible asymmetry.<sup>24-26</sup>  
26 Funnel plots were also used to assess the publication bias. All the statistical analyses were  
27 performed in Stata 12 (Stata Corp, College Station, TX). A threshold of P<0.1 was used to decide  
28 whether heterogeneity or publication bias was present.<sup>24</sup> In other ways, P values were 2-sided and  
29 P<0.05 was considered statistically significant.

## 37 Results

### 38 Literature search

39 **In total, the search strategy retrieved 673 unique articles (308 articles from PubMed and 365**  
40 **articles from Embase) (Fig 1).** After exclusion of duplicate records and studies that did not fulfill  
41 our inclusion criteria, 27 articles remained, and we further evaluated the full texts of these 27  
42 publications. Of these, we excluded 17 studies as follows. Five articles were excluded owing to  
43 lack of sufficient data for estimation of relative risks.<sup>27-31</sup> Five articles were excluded because no  
44 original data could be extracted (review, type 1 diabetes, or cross sectional studies).<sup>32-36</sup> Another  
45 four articles were excluded because we deemed irrelevant.<sup>37-40</sup> We also excluded three articles  
46 because they did not give enough details on fruits, vegetables, or fruit and vegetables intake to  
47 warrant inclusion within the meta-analysis.<sup>41-43</sup> In addition, three articles with the same  
48 participants involved Nurses Health Study (Colditz et al 1992, Bazzano et al 2008, and Muraki et  
49 al 2013). According to the study selection criteria, we included the study by Bazzano et al, which  
50 followed for 18 years.<sup>44</sup> Finally, eleven articles met the inclusion criteria and were included in the  
51 meta-analysis.<sup>5,7,10,11,15,44-48</sup> Among these ten articles, Ford et al and Kurotani et al study examined  
52 male and female separately,<sup>7,11</sup> Cooper et al have two studies (study a:2012 and study b:2012)

and Muraki et al report included data from two independent cohorts.<sup>15</sup> Thus, our meta-analysis included thirteen comparisons.

### Study characteristics

Supplemental tables A and B in appendix 1 show the characteristics and main outcomes extracted from the included studies, all ten articles were prospective cohort designs and participants who were free of self reported diabetes at baseline.<sup>5,7,10,11,15,44-48</sup> In total, the included studies consisted of 434 342 participants. Of these participants, we identified 24 013 cases of T2D occurred during follow-up periods ranging from 4.6 to 23 years (median of 11 years). Among 10 articles, five cohorts were conducted primarily in the United States,<sup>11,15,44-46</sup> two articles were done in Asian countries (China and Japan)<sup>7,48</sup> and three cohorts were from European countries.<sup>5,10,47</sup> The number of participants ranged from 3704 in the EPIC-Norfolk study by Cooper et al<sup>10</sup> to 91 246 in the Nurses' Health Study II by Muraki et al.<sup>11</sup> Five studies included both male and female,<sup>5,7,10,15,47</sup> four studies included only female.<sup>44-46,48</sup> One article by Muraki et al reported two independent cohorts, one cohorts included only female, and another only male.<sup>11</sup> The age of participants ranged from 24 to 79 years. Six papers provided information on fruit and vegetables intake separately and combined.<sup>5,7,10,44-46</sup> two papers provided information on fruit and vegetables intake separately,<sup>47,48</sup> one paper provided only the combined data,<sup>15</sup> and another paper provided separate data on fruit.<sup>11</sup> Five papers also included separate data on the intake of GLV.<sup>5,7,46-48</sup> In most papers intake of fruit and vegetables was divided into fifths.<sup>11,44-48</sup> All studies provided adjusted risk estimates, results of study quality assessment (score 0-6) showed that most studies yielded a score of 3 or below (low quality).

### Fruit intake and risk of T2D

11 comparisons from nine studies reported an association between fruit intake and risk of T2D, with 22 995 T2D outcomes and 424 677 participants. Overall, fruit intake was inversely associated with risk (relative risk 0.93, 95% confidence interval 0.88 to 0.99) (fig 2). We saw no heterogeneity among studies ( $P=0.477$ ,  $I^2=0\%$ ). Additionally, no evidence of substantial publication bias was observed from the Begg ( $P=0.533$ ) and Egger regression tests ( $P=0.849$ ) (see supplemental table B in appendix 1). Among 11 comparisons, seven comparisons were eligible for the dose-response analysis of fruit intake and risk of T2D. Using a restricted cubic splines model, we found a mild curvilinear association ( $P=0.059$  for non-linearity, fig 3). Dose-response analysis indicated that a 1 serving/day increment of fruit intake was associated with 6% lower risk of T2D (relative risk 0.94, 95% confidence interval 0.89 to 1.00,  $I^2=0\%$ ) (see supplemental fig A in appendix 2).

### Vegetables intake and risk of T2D

Eight studies reported an association between vegetables intake and risk of T2D, with 20 933 T2D outcomes and 290 927 participants. Using a random effects model summarizing all 9 comparisons, we found no association between vegetables intake and risk (relative risk 0.90, 95% confidence interval 0.80 to 1.01) (fig 4). There was moderate study heterogeneity ( $P=0.002$ ,  $I^2=66.5\%$ ). However, no evidence of substantial publication bias was observed from the Begg ( $P=0.602$ ) and Egger regression tests ( $P=0.176$ ) (see supplemental table B in appendix 1). Among 9 comparisons, five comparisons were eligible for the trend estimation. Dose-response analysis found no association with risk of T2D per 1 serving/day increment of vegetables intake (relative risk 0.98, 95% confidence interval 0.89 to 1.08,  $I^2=45.8\%$ ) (see supplemental fig B in appendix 2). No publication bias was observed ( $P=0.117$ ). We found no evidence of a curve linear association

1  
2  
3 between vegetables intake and risk ( $P=0.671$  for non-linearity, see supplemental fig C in appendix  
4 2).

### 5 **Fruit and vegetables intake and risk of T2D**

6 Information on fruit and vegetables intake and T2D were available in 9 comparisons from seven  
7 prospective studies, totalling 20 672 T2D outcomes and 232 097 participants. Overall, fruit and  
8 vegetables intake was not associated with risk (relative risk 0.94, 95% confidence interval 0.86 to  
9 1.03) (see supplemental fig D in appendix 2). We saw no heterogeneity among studies ( $P=0.141$ ,  
10  $I^2=34.6\%$ ). Additionally, no evidence of substantial publication bias was observed from the Begg  
11 ( $P=0.348$ ) and Egger regression tests ( $P=0.609$ ) (see supplemental table B in appendix 1). Among  
12 9 comparisons, six comparisons were eligible for the dose-response analysis of fruit and  
13 vegetables intake and risk of T2D. We did not find a significant curvilinear association ( $P=0.456$   
14 for non-linearity, see supplemental fig E in appendix 2). Dose-response analysis indicated that a 1  
15 serving/day increment of fruit and vegetables intake (relative risk 0.96, 95% confidence interval  
16 0.86 to 1.07,  $I^2=47.6\%$ ) (see supplemental fig F in appendix 2).

### 17 **GLV intake and risk of T2D**

18 7 comparisons from six studies reported an association between GLV intake and risk of T2D, with  
19 139 T2D outcomes and 251 235 participants. Overall, GLV intake was inversely associated  
20 with risk (relative risk 0.87, 95% confidence interval 0.81 to 0.93) (fig 5). No significant  
21 heterogeneity was detected among studies ( $P=0.496$ ,  $I^2=0\%$ ). Additionally, we did not observe  
22 evidence of substantial publication bias (the Begg and Egger regression tests,  $P=0.133$  and  
23  $P=0.101$ , respectively) (see supplemental table B in appendix 1). Among 7 comparisons, only  
24 three comparisons were eligible for the trend estimation. Using a restricted cubic splines model,  
25 we found a significant curvilinear association ( $P=0.036$  for non-linearity, fig 6). Dose-response  
26 analysis indicated that a 0.2 serving/day increment of GLV intake was associated with 13% lower  
27 risk of T2D (relative risk 0.87, 95% confidence interval 0.76 to 0.99,  $I^2=20.9\%$ ) (see supplemental  
28 fig G in appendix 2). No publication bias was observed ( $P=0.282$ ).

### 29 **Subgroup analyses**

30 To examine the stability of the primary results, we carried out subgroup analyses (table 1). The  
31 association between fruit, vegetables, or fruit and vegetables intake and risk of T2D were similar  
32 in subgroup analyses, which were separately defined study quality, length of follow-up, sex,  
33 location, number of cases or participants, and whether the different ways in which authors had  
34 grouped intake (thirds, quarters, or fifths) affected the results. The summary estimates of relative  
35 risks from each category were pooled (see supplemental table B in appendix 1). We paid close  
36 attention to the highest versus lowest category. Almost all subgroups that analysed intake of GLV  
37 showed a benefit of consuming greater quantities (fig 5). Supplemental table B in appendix 1 also  
38 showed significant reductions in risk of T2D events for consumption of fruit, vegetables, or fruit  
39 and vegetables combined.  
40  
41  
42  
43  
44  
45  
46  
47  
48  
49

### 50 **Discussion**

51 In this meta-analysis dietary intake of fruit, vegetables, and GLV, but not fruit and vegetables  
52 combined, were associated with a lower risk of T2D. Dose-response analyses indicated a 6%  
53 lower risk of T2D per 1 serving/day increment of fruit intake and 13% lower risk of T2D per 0.2  
54 serving/day increment of GLV intake, but no significant trend for vegetables or fruit and  
55 vegetables combined.  
56  
57  
58  
59  
60



### Results in relation to other studies

Over the past decades, extensive prospective studies have reported the association of fruit, vegetables, or fruit and vegetables combined with T2D risk.<sup>5,7,10,11,15,44-48</sup> However, the role of dietary factors in T2D is still controversial. Some of the studies failed to find the association between fruit intake or fruit and vegetables combined and risk of T2D.<sup>8,45</sup> However, Bazzano and colleagues analysed data from 11 different U.S. states with 18 years of follow-up and found that consumption of fruit was associated with a lower hazard of diabetes, whereas no significant association for total fruit and vegetables consumption.<sup>44</sup> Similar to previous analysis in the Nurses' Health Study, the results from three prospective longitudinal cohort studies also supported an inverse association between fruit intake and risk of T2D.<sup>11</sup> But these studies have the potential for bias due to measurement error. In addition, two cohort studies have suggested an inverse association between total fruit and vegetables consumption and risk of T2D.<sup>10,15</sup>

A few large cohort studies have found an inverse association between vegetables consumption, especially GLV and risk of T2D.<sup>10,46-48</sup> These findings all agreed with two meta-analyses.<sup>5,9</sup> But another systematic review based on five cohort studies suggested that there was no protective association between vegetables intake and T2D.<sup>8</sup>

Several plausible biological mechanisms have been proposed to explain abovementioned association. Fruit and vegetables are rich in fibre,<sup>49</sup> which has been shown to improve insulin sensitivity and insulin secretion to overcome insulin resistance.<sup>50</sup> However, meta-analyses showed that fruit and vegetables fibre is inconsistently associated with the risk of T2D.<sup>51</sup> On the other hand, it may contribute to a decreased incidence of T2D through their low energy density and glycemic load, and high micronutrient content.<sup>52</sup> In particular, GLV are rich in bioactive phytochemicals (such as vitamin C and carotenoids), which are known for their antioxidant properties.<sup>53-55</sup> Antioxidants in fruit and vegetables have been hypothesized to improve insulin sensitivity and protect against diabetes in several supplementation trials.<sup>56,57</sup> In addition, it also might reduce the risk of T2D due to the supply of magnesium (Mg), a recent meta-analysis detected Mg intake to be inversely associated with the risk of T2D.<sup>58</sup> Taking this evidence into consideration, it appears that the beneficial effects of vegetables, particularly GLV consumption on the risk of T2D can be mainly explained by antioxidant vitamins and magnesium. The inverse association may be also mediated through weight gain or obesity which is an established risk factor for type 2 diabetes. Fruits are low in energy, which would promote the feeling of fullness and prevent over consumption of energy-dense foods, and resulting in weight loss.<sup>55</sup> Further investigation is warranted to understand the mechanisms involved in the proposed relation between fruit, vegetables, or GLV and risk of T2D.

### Exploration of heterogeneity

Heterogeneity between studies was found, which did not alter much in the subgroup analyses. There are differences in types of vegetable consumed between Asian (such as China) and Non-Asian populations. Therefore, within the subgroup analysis we examined location as a possible source of heterogeneity. As traditional Chinese diets are high in vegetables (such as GLV and cruciferous vegetables), unsurprisingly, vegetables (including GLV) intake were greater in China than the US or Europe. We also examined study quality, length of follow-up, sex, number of cases or participants, and whether the different ways in which authors had grouped intake (thirds, quarters, or fifths) as possible sources of heterogeneity, these did not show any significant heterogeneity between studies. Although the subgroup analysis could not explain the level of

1  
2  
3 heterogeneity, in interpreting the results, several differences between the studies are worth  
4 discussing.

5 Assessment methods of fruit, vegetables, or fruit and vegetables combined consumption differed  
6 between the studies. Most epidemiological studies used the food frequency questionnaires (FFQs)  
7 to assess quantity of fruit, vegetables, or fruit and vegetables combined intake.<sup>7,10,11,44-46,48</sup> It is less  
8 suitable for the assessment of absolute intake, which they tend to overestimate.<sup>59,60</sup> However, two  
9 studies collected data via a single 24 hour recall and dietary history interviews, respectively.<sup>15,47</sup>  
10 These measurements may underestimate true associations between fruit, vegetables, or fruit and  
11 vegetables combined consumption and risk of T2D. In addition, calculations of daily consumption  
12 were differed (such as servings per week, servings per day, or grams per day). Although we  
13 standardized primary data using a standard portion size of 106g, conclusions should be interpreted  
14 with caution. Another possible explanation for the differences between the studies might be the  
15 classification of food groups. GLVs' criteria was inconsistent: three studies included spinach and  
16 lettuce; one included spinach and greens; others did not provide specific description. If they were  
17 included with an uniform definition of each groups, the associations might differ.

### 22 **Strengths and limitations**

23 Compared with the previous meta-analyses,<sup>5,8,9</sup> our study has several strengths. To our knowledge,  
24 this is the largest systematic review and meta-analysis on the intake of fruit and vegetables and  
25 risk of T2D. In addition, to examine the shape of these possible associations, we investigated a  
26 dose-response relation between fruit, vegetables, fruit and vegetables combined consumption and  
27 risk of T2D. Therefore, the results should be more reliable.

28 In interpreting the results, several limitations of this meta-analysis should also be acknowledged.  
29 Firstly, although in the multivariable analysis we considered a multitude of lifestyle and dietary  
30 factors. The possibility of residual confounding or confounding by unmeasured factors, which  
31 cannot be ruled out in any observational study, must be acknowledged. **Second, the possibility of  
32 recall bias in the measurements of dietary habits based on the FFQs cannot be ruled out. However,  
33 the strict inclusion and exclusion criteria should minimize such bias.** Third, the noticeable  
34 limitation of our study was the potential for bias due to inevitable measurement error, especially  
35 for individual with lower consumption levels. We attempted to reduce measurement error in  
36 adjusting for energy intake and using of cumulatively averaged intake levels. Fourth, because we  
37 had no source of information other than questionnaire for the identification of T2D, we might have  
38 underestimated the incidence of T2D. In addition, subclinical diseases at baseline might have  
39 distorted our risk estimate to some extent. Finally, the possible limitation is due to language bias.  
40 We attempted to minimize this bias by searching major electronic databases with no language  
41 restriction. However, several articles published in non-English languages might not appear in  
42 international journal databases, and could be omitted by our searches.<sup>61</sup>

### 49 **Conclusions**

50 In summary, our meta-analysis suggests that higher fruit or GLV intake is associated with a  
51 significantly reduced risk of T2D. In addition, the dose-response relations also indicate that  
52 relatively high fruit or GLV may still decrease risk of T2D. Further evidence from preferably  
53 randomized controlled studies should explore what kind of fruit or GLV can reduce the risk of  
54 T2D.  
55  
56  
57  
58  
59  
60

Contributors: ML and ZT conceived and designed the study. ML and YF searched the databases and checked them according to the eligible criteria and exclusion criteria. ZT helped develop search strategies. XZ and WH extract quantitative data. YF, XZ, and WH analyzed the data. ML wrote the draft of the paper. All authors contributed to writing, reviewing, or revising the paper. ZT is the guarantor.

Funding: This work was not funded by any foundation or program.

Competing interests: All authors have completed the ICMJE uniform disclosure form at [www.icmje.org/coi\\_disclosure.pdf](http://www.icmje.org/coi_disclosure.pdf) (available on request from the corresponding author) and declare: no support from any organization for the submitted work; no financial relationships with any organizations that might have an interest in the submitted work in the previous three years; no other relationships or activities that could appear to have influenced the submitted work.

Ethical approval: Not required.

Data sharing: No additional data available.

### Figures Information

**Figure 1. Process of literature search and study selection.**

(TIFF)

**Figure 2. Random effects analysis of fully adjusted studies for highest versus lowest intake of fruit and risk of type 2 diabetes.**

(TIFF)

**Figure 3. Dose-response analyses of fruit intake and risk of type 2 diabetes.**

(TIFF)

**Figure 4. Random effects analysis of fully adjusted studies for highest versus lowest intake of vegetables and risk of type 2 diabetes.**

(TIFF)

**Figure 5. Random effects analysis of fully adjusted studies for highest versus lowest intake of green leafy vegetables and risk of type 2 diabetes.**

(TIFF)

**Figure 6. Dose-response analyses of green leafy vegetables intake and risk of type 2 diabetes.**

(TIFF)

### Appendix figure information

**Supplemental fig A. Forest plot of fruit intake and risk of type 2 diabetes.**

(TIFF)

**Supplemental fig B. Forest plot of vegetables intake and risk of type 2 diabetes.**

(TIFF)

**Supplemental fig C. Dose-response analyses of vegetables intake and risk of type 2 diabetes.**



1  
2  
3 (TIFF)

4  
5  
6 **Supplemental fig D. Random effects analysis of fully adjusted studies for highest versus**  
7 **lowest intake of fruit and vegetables and risk of type 2 diabetes.**

8 (TIFF)

9  
10  
11 **Supplemental fig E. Dose-response analyses of fruit and vegetables intake and risk of type 2**  
12 **diabetes.**

13 (TIFF)

14  
15  
16 **Supplemental fig F. Forest plot of fruit and vegetables intake and risk of type 2 diabetes.**

17 (TIFF)

18  
19  
20 **Supplemental fig G. Forest plot of green leafy vegetables intake and risk of type 2 diabetes.**

21 (TIFF)

- 22  
23  
24 1 Shaw JE, Sicree RA, Zimmet PZ. Global estimates of the prevalence of diabetes for 2010 and  
25 2030. *Diabetes Res Clin Pract* 2010;87:4-14.
- 26 2 Jonsson B. Revealing the cost of Type II diabetes in Europe. *Diabetologia* 2002;45:S5-12.
- 27 3 Zhang P, Zhang X, Brown J, Vistisen D, Sicree R, Shaw J, et al. Global healthcare expenditure  
28 on diabetes for 2010 and 2030. *Diabetes Res Clin Pract* 2010;87:293-301.
- 29 4 Gillies CL, Abrams KR, Lambert PC, Cooper NJ, Sutton AJ, Hsu RT, et al. Pharmacological and  
30 lifestyle interventions to prevent or delay type 2 diabetes in people with impaired glucose  
31 tolerance: systematic review and meta-analysis. *BMJ* 2007;334:299.
- 32 5 Cooper AJ, Forouhi NG, Ye Z, Buijsse B, Arriola L, Balkau B, et al. Fruit and vegetable intake  
33 and type 2 diabetes: EPIC-InterAct prospective study and meta-analysis. *Eur J Clin Nutr*  
34 2012;66:1082-92.
- 35 6 World Health Organization/UN Food and Agriculture Organization. *Diet, Nutrition and the*  
36 *Prevention of Chronic Diseases: Report of a Joint FAO/WHO Expert Consultation*. Geneva,  
37 World Health Org., 2003 (Tech. Rep. Ser., no. 916).
- 38 7 Kurotani K, Nanri A, Goto A, Mizoue T, Noda M, Kato M, et al. Vegetable and fruit intake and  
39 risk of type 2 diabetes: Japan Public Health Center-based Prospective Study. *Br J Nutr*  
40 2013;109:709-17.
- 41 8 Hamer M, Chida Y. Intake of fruit, vegetables, and antioxidants and risk of type 2 diabetes:  
42 systematic review and meta-analysis. *J Hypertens* 2007;25:2361-9.
- 43 9 Carter P, Gray LJ, Troughton J, Khunti K, Davies MJ. Fruit and vegetable intake and incidence  
44 of type 2 diabetes mellitus: systematic review and meta-analysis. *BMJ* 2010;341:c4229.
- 45 10 Cooper AJ, Sharp SJ, Lentjes MA, Luben RN, Khaw KT, Wareham NJ, et al. A prospective  
46 study of the association between quantity and variety of fruit and vegetable intake and incident  
47 type 2 diabetes. *Diabetes Care* 2012;35:1293-300.
- 48 11 Muraki I, Imamura F, Manson JE, Hu FB, Willett WC, van Dam RM, et al. Fruit consumption  
49 and risk of type 2 diabetes: results from three prospective longitudinal cohort studies. *BMJ*  
50 2013;347:f5001.
- 51  
52  
53  
54  
55  
56  
57  
58  
59  
60

- 12 Stroup DF, Berlin JA, Morton SC, Olkin I, Williamson GD, Rennie D, et al. Meta-analysis of observational studies in epidemiology: a proposal for reporting. Meta-analysis Of Observational Studies in Epidemiology (MOOSE) group. *JAMA* 2000;283:2008-12.
- 13 Wong WC, Cheung CS, Hart GJ. Development of a quality assessment tool for systematic reviews of observational studies (QATSO) of HIV prevalence in men having sex with men and associated risk behaviours. *Emerg Themes Epidemiol* 2008;5:23.
- 14 von EE, Altman DG, Egger M, Pocock SJ, Gøtzsche PC, Vandenbroucke JP. The Strengthening the Reporting of Observational Studies in Epidemiology (STROBE) statement: guidelines for reporting observational studies. *Prev Med* 2007;45:247-51.
- 15 Ford ES, Mokdad AH. Fruit and vegetable consumption and diabetes mellitus incidence among U.S. adults. *Prev Med* 2001;32:33-9.
- 16 DerSimonian R, Laird N. Meta-analysis in clinical trials. *Control Clin Trials* 1986;7:177-88.
- 17 Dauchet L, Amouyel P, Hercberg S, Dallongeville J. Fruit and vegetable consumption and risk of coronary heart disease: a meta-analysis of cohort studies. *J Nutr* 2006;136:2588-93.
- 18 Greenland S, Longnecker MP. Methods for trend estimation from summarized dose-response data, with applications to meta-analysis. *Am J Epidemiol* 1992;135:1301-9.
- 19 Orsini N, Bellocco R, Greenland S. Generalized least squares for trend estimation of summarized dose-response data. *Stata Journal* 2006;6:40-57.
- 20 Orsini N, Li R, Wolk A, Khudyakov P, Spiegelman D. Meta-analysis for linear and nonlinear dose-response relations: examples, an evaluation of approximations, and software. *Am J Epidemiol* 2012;175:66-73.
- 21 Shaw JE, Sicree RA, Zimmet PZ. Global estimates of the prevalence of diabetes for 2010 and 2030. *Diabetes Res Clin Pract* 2010;87:4-14.
- 22 Harrell FE Jr, Lee KL, Pollock BG. Regression models in clinical studies: determining relationships between predictors and response. *J Natl Cancer Inst* 1988;80:1198-202.
- 23 Higgins JP, Thompson SG, Deeks JJ, Altman DG. Measuring inconsistency in meta-analyses. *BMJ* 2003;327:557-60.
- 24 Begg CB, Mazumdar M. Operating characteristics of a rank correlation test for publication bias. *Biometrics* 1994;50:1088-101.
- 25 Egger M, Davey SG, Schneider M, Minder C. Bias in meta-analysis detected by a simple, graphical test. *BMJ* 1997;315:629-34.
- 26 Peters JL, Sutton AJ, Jones DR, Abrams KR, Rushton L. Contour-enhanced meta-analysis funnel plots help distinguish publication bias from other causes of asymmetry. *J Clin Epidemiol* 2008;61:991-6.
- 27 Bauer F, Beulens JW, van der A DL, Wijnenga C, Grobbee DE, Spijkerman AM, et al. Dietary patterns and the risk of type 2 diabetes in overweight and obese individuals. *Eur J Nutr* 2013;52:1127-34.
- 28 Eshak ES, Iso H, Mizoue T, Inoue M, Noda M, Tsugane S. Soft drink, 100% fruit juice, and vegetable juice intakes and risk of diabetes mellitus. *Clin Nutr* 2013;32:300-8.
- 29 von RA, Feller S, Bergmann MM, Boeing H. Diet and risk of chronic diseases: results from the first 8 years of follow-up in the EPIC-Potsdam study. *Eur J Clin Nutr* 2013;67:412-9.
- 30 Yu R, Woo J, Chan R, Sham A, Ho S, Tso A, et al. Relationship between dietary intake and the development of type 2 diabetes in a Chinese population: the Hong Kong Dietary Survey. *Public Health Nutr* 2011;14:1133-41.

- 1  
2  
3 31 Morimoto A, Ohno Y, Tatsumi Y, Mizuno S, Watanabe S. Effects of healthy dietary pattern and  
4 other lifestyle factors on incidence of diabetes in a rural Japanese population. *Asia Pac J Clin*  
5 *Nutr* 2012;21:601-8.  
6  
7 32 Martinez-Gonzalez MA, de la Fuente-Arrillaga C, Lopez-Del-Burgo C, Vazquez-Ruiz Z,  
8 Benito S, Ruiz-Canela M. Low consumption of fruit and vegetables and risk of chronic disease:  
9 a review of the epidemiological evidence and temporal trends among Spanish graduates.  
10 *Public Health Nutr* 2011;14:2309-15.  
11  
12 33 Esposito K, Kastorini CM, Panagiotakos DB, Giugliano D. Prevention of type 2 diabetes by  
13 dietary patterns: a systematic review of prospective studies and meta-analysis. *Metab Syndr*  
14 *Relat Disord* 2010;8:471-6.  
15  
16 34 Lodefalk M, Aman J. Food habits, energy and nutrient intake in adolescents with Type 1  
17 diabetes mellitus. *Diabet Med* 2006;23:1225-32.  
18  
19 35 Zhu Y, Zhang Y, Ling W, Feng D, Wei X, Yang C, et al. Fruit consumption is associated with  
20 lower carotid intima-media thickness and C-reactive protein levels in patients with type 2  
21 diabetes mellitus. *J Am Diet Assoc* 2011;111:1536-42.  
22  
23 36 Hosseinpour-Niazi S, Mirmiran P, Sohrab G, Hosseini-Esfahani F, Azizi F. Inverse association  
24 between fruit, legume, and cereal fiber and the risk of metabolic syndrome: Tehran Lipid and  
25 Glucose Study. *Diabetes Res Clin Pract* 2011;94:276-83.  
26  
27 37 Odegaard AO, Koh WP, Arakawa K, Yu MC, Pereira MA. Soft drink and juice consumption  
28 and risk of physician-diagnosed incident type 2 diabetes: the Singapore Chinese Health Study.  
29 *Am J Epidemiol* 2010;171:701-8.  
30  
31 38 Hodge AM, English DR, O'Dea K, Giles GG. Dietary patterns and diabetes incidence in the  
32 Melbourne Collaborative Cohort Study. *Am J Epidemiol* 2007;165:603-10.  
33  
34 39 Cai H, Shu XO, Gao YT, Li H, Yang G, Zheng W. A prospective study of dietary patterns and  
35 mortality in Chinese women. *Epidemiology* 2007;18:393-401.  
36  
37 40 Sartorelli DS, Cardoso MA. [Association between dietary carbohydrates and type 2 diabetes  
38 mellitus: epidemiological evidence]. *Arq Bras Endocrinol Metabol* 2006;50:415-26.  
39  
40 41 Erber E, Hopping BN, Grandinetti A, Park SY, Kolonel LN, Maskarinec G. Dietary patterns  
41 and risk for diabetes: the multiethnic cohort. *Diabetes Care* 2010;33:532-8.  
42  
43 42 Sluijs I, Beulens JW, van der A DL, Spijkerman AM, Grobbee DE, van der Schouw YT.  
44 Dietary intake of total, animal, and vegetable protein and risk of type 2 diabetes in the  
45 European Prospective Investigation into Cancer and Nutrition (EPIC)-NL study. *Diabetes Care*  
46 2010;33:43-8.  
47  
48 43 Liese AD, Weis KE, Schulz M, Tooze JA. Food intake patterns associated with incident type 2  
49 diabetes: the Insulin Resistance Atherosclerosis Study. *Diabetes Care* 2009;32:263-8.  
50  
51 44 Bazzano LA, Li TY, Josphipura KJ, Hu FB. Intake of fruit, vegetables, and fruit juices and risk  
52 of diabetes in women. *Diabetes Care* 2008;31:1311-7.  
53  
54 45 Meyer KA, Kushi LH, Jacobs DR Jr, Slavin J, Sellers TA, Folsom AR. Carbohydrates, dietary  
55 fiber, and incident type 2 diabetes in older women. *Am J Clin Nutr* 2000;71:921-30.  
56  
57 46 Liu S, Serdula M, Janket SJ, Cook NR, Sesso HD, Willett WC, et al. A prospective study of  
58 fruit and vegetable intake and the risk of type 2 diabetes in women. *Diabetes Care*  
59 2004;27:2993-6.  
60  
61 47 Montonen J, Jarvinen R, Heliiovaara M, Reunanen A, Aromaa A, Knekt P. Food consumption  
62 and the incidence of type II diabetes mellitus. *Eur J Clin Nutr* 2005;59:441-8.

- 1  
2  
3 48 Villegas R, Shu XO, Gao YT, Yang G, Elasy T, Li H, et al. Vegetable but not fruit consumption  
4 reduces the risk of type 2 diabetes in Chinese women. *J Nutr* 2008;138:574-80.  
5  
6 49 McKee LH, Latner TA. Underutilized sources of dietary fiber: a review. *Plant Foods Hum Nutr*  
7 2000;55:285-304.  
8  
9 50 Liese AD, Roach AK, Sparks KC, Marquart L, D'Agostino RB Jr, Mayer-Davis EJ.  
10 Whole-grain intake and insulin sensitivity: the Insulin Resistance Atherosclerosis Study. *Am J*  
11 *Clin Nutr* 2003;78:965-71.  
12  
13 51 Schulze MB, Schulz M, Heidemann C, Schienkiewitz A, Hoffmann K, Boeing H. Fiber and  
14 magnesium intake and incidence of type 2 diabetes: a prospective study and meta-analysis.  
15 *Arch Intern Med* 2007;167:956-65.  
16  
17 52 Jenkins DJ, Wolever TM, Buckley G, Lam KY, Giudici S, Kalmusky J, et al.  
18 Low-glycemic-index starchy foods in the diabetic diet. *Am J Clin Nutr* 1988;48:248-54.  
19  
20 53 Tarwadi K, Agte V. Potential of commonly consumed green leafy vegetables for their  
21 antioxidant capacity and its linkage with the micronutrient profile. *Int J Food Sci Nutr*  
22 2003;54:417-25.  
23  
24 54 Hozawa A, Jacobs DR Jr, Steffes MW, Gross MD, Steffen LM, Lee DH. Associations of serum  
25 carotenoid concentrations with the development of diabetes and with insulin concentration:  
26 interaction with smoking: the Coronary Artery Risk Development in Young Adults (CARDIA)  
27 Study. *Am J Epidemiol* 2006;163:929-37.  
28  
29 55 Harding AH, Wareham NJ, Bingham SA, Khaw K, Luben R, Welch A, et al. Plasma vitamin C  
30 level, fruit and vegetable consumption, and the risk of new-onset type 2 diabetes mellitus: the  
31 European prospective investigation of cancer--Norfolk prospective study. *Arch Intern Med*  
32 2008;168:1493-9.  
33  
34 56 Liu S, Ajani U, Chae C, Hennekens C, Buring JE, Manson JE. Long-term beta-carotene  
35 supplementation and risk of type 2 diabetes mellitus: a randomized controlled trial. *JAMA*  
36 1999;282:1073-5.  
37  
38 57 Ceriello A, Motz E. Is oxidative stress the pathogenic mechanism underlying insulin resistance,  
39 diabetes, and cardiovascular disease? The common soil hypothesis revisited. *Arterioscler*  
40 *Thromb Vasc Biol* 2004;24:816-23.  
41  
42 58 Larsson SC, Wolk A. Magnesium intake and risk of type 2 diabetes: a meta-analysis. *J Intern*  
43 *Med* 2007;262:208-14.  
44  
45 59 Feskanih D, Rimm EB, Giovannucci EL, Colditz GA, Stampfer MJ, Litin LB, et al.  
46 Reproducibility and validity of food intake measurements from a semiquantitative food  
47 frequency questionnaire. *J Am Diet Assoc* 1993;93:790-6.  
48  
49 60 Bingham SA, Welch AA, McTaggart A, Mulligan AA, Runswick SA, Luben R, et al.  
50 Nutritional methods in the European Prospective Investigation of Cancer in Norfolk. *Public*  
51 *Health Nutr* 2001;4:847-58.  
52  
53  
54  
55  
56  
57  
58  
59  
60 61 Li M, Hou W, Zhang X, Hu L, Tang Z. Hyperuricemia and risk of stroke: a systematic review  
and meta-analysis of prospective studies. *Atherosclerosis* 2014;232:265-70.

Table 1. Subgroup analyses to investigate differences between studies included in meta-analysis (highest versus lowest category)

| Variables                     | Fruit only |                     |         | Vegetables only |                     |         | Fruit and vegetables |                     |         | Green leafy vegetables |                     |         |
|-------------------------------|------------|---------------------|---------|-----------------|---------------------|---------|----------------------|---------------------|---------|------------------------|---------------------|---------|
|                               | No         | Pooled RR (95% CI)  | P value | No              | Pooled RR (95% CI)  | P value | No                   | Pooled RR (95% CI)  | P value | No                     | Pooled RR (95% CI)  | P value |
| Location                      |            |                     |         |                 |                     |         |                      |                     |         |                        |                     |         |
| Non-Asia                      | 8          | 0.93 (0.87 to 1.00) | 0.049   | 6               | 0.96 (0.87 to 1.06) | 0.397   | 7                    | 0.94 (0.84 to 1.04) | 0.223   | 4                      | 0.89 (0.81 to 0.97) | 0.012   |
| Asia                          | 3          | 0.96 (0.82 to 1.12) | 0.584   | 3               | 0.77 (0.60 to 0.98) | 0.032   | 2                    | 0.97 (0.75 to 1.25) | 0.827   | 3                      | 0.80 (0.69 to 0.93) | 0.004   |
| Quality                       |            |                     |         |                 |                     |         |                      |                     |         |                        |                     |         |
| High ( $\geq 4$ )             | 4          | 0.92 (0.86 to 1.00) | 0.045   | 2               | 0.83 (0.52 to 1.33) | 0.448   | 1                    | 1.04 (0.87 to 1.25) | 0.671   | 2                      | 0.86 (0.76 to 0.98) | 0.024   |
| Low ( $< 4$ )                 | 7          | 0.94 (0.85 to 1.04) | 0.240   | 7               | 0.93 (0.84 to 1.02) | 0.109   | 8                    | 0.93 (0.84 to 1.02) | 0.138   | 5                      | 0.86 (0.77 to 0.97) | 0.010   |
| Duration of follow-up (years) |            |                     |         |                 |                     |         |                      |                     |         |                        |                     |         |
| $\geq 10$                     | 5          | 0.90 (0.83 to 0.97) | 0.006   | 4               | 0.91 (0.79 to 1.05) | 0.190   | 5                    | 0.89 (0.77 to 1.02) | 0.098   | 3                      | 0.85 (0.75 to 0.97) | 0.014   |
| $< 10$                        | 6          | 0.98 (0.90 to 1.07) | 0.654   | 5               | 0.89 (0.72 to 1.10) | 0.296   | 4                    | 1.03 (0.91 to 1.16) | 0.674   | 4                      | 0.87 (0.78 to 0.97) | 0.013   |
| Sex                           |            |                     |         |                 |                     |         |                      |                     |         |                        |                     |         |
| M and F                       | 5          | 0.88 (0.79 to 0.98) | 0.022   | 5               | 0.89 (0.81 to 0.97) | 0.010   | 6                    | 0.87 (0.77 to 0.98) | 0.026   | 4                      | 0.80 (0.69 to 0.92) | 0.002   |
| F only                        | 5          | 0.95 (0.88 to 1.02) | 0.168   | 4               | 0.94 (0.77 to 1.15) | 0.544   | 3                    | 1.02 (0.94 to 1.11) | 0.610   | 3                      | 0.89 (0.81 to 0.98) | 0.014   |
| M only                        | 1          | 0.99 (0.82 to 1.19) | 0.916   | 0               | -                   | -       | 0                    | -                   | -       | 0                      | -                   | -       |
| Fractions of distribution     |            |                     |         |                 |                     |         |                      |                     |         |                        |                     |         |
| Thirds                        | 1          | 0.91 (0.71 to 1.16) | 0.451   | 1               | 0.94 (0.84 to 1.05) | 0.277   | 1                    | 0.90 (0.80 to 1.01) | 0.076   | 1                      | 0.84 (0.65 to 1.08) | 0.170   |
| Quarters                      | 3          | 0.92 (0.81 to 1.04) | 0.193   | 3               | 0.77 (0.60 to 0.98) | 0.032   | 2                    | 0.97 (0.75 to 1.25) | 0.827   | 3                      | 0.80 (0.69 to 0.93) | 0.004   |
| Fifths                        | 7          | 0.94 (0.87 to 1.02) | 0.144   | 5               | 0.96 (0.84 to 1.09) | 0.499   | 6                    | 0.94 (0.82 to 1.08) | 0.385   | 3                      | 0.89 (0.78 to 1.01) | 0.062   |
| No of participants            |            |                     |         |                 |                     |         |                      |                     |         |                        |                     |         |
| $\geq 50000$                  | 3          | 0.91 (0.84 to 0.99) | 0.032   | 2               | 0.83 (0.52 to 1.33) | 0.448   | 1                    | 1.01 (0.91 to 1.13) | 0.858   | 2                      | 0.86 (0.76 to 0.98) | 0.024   |
| $< 50000$                     | 8          | 0.95 (0.87 to 1.04) | 0.237   | 7               | 0.93 (0.84 to 1.02) | 0.109   | 8                    | 0.92 (0.83 to 1.03) | 0.146   | 5                      | 0.86 (0.77 to 0.97) | 0.010   |
| No of cases                   |            |                     |         |                 |                     |         |                      |                     |         |                        |                     |         |
| $\geq 1000$                   | 5          | 0.95 (0.88 to 1.03) | 0.233   | 4               | 1.01 (0.94 to 1.08) | 0.810   | 6                    | 0.96 (0.86 to 1.07) | 0.456   | 3                      | 0.91 (0.84 to 0.98) | 0.018   |
| $< 1000$                      | 6          | 0.91 (0.82 to 1.00) | 0.042   | 5               | 0.75 (0.66 to 0.85) | 0.000   | 3                    | 0.87 (0.73 to 1.04) | 0.119   | 4                      | 0.78 (0.68 to 0.89) | 0.000   |

M=male, F=female, RR=relative risk.

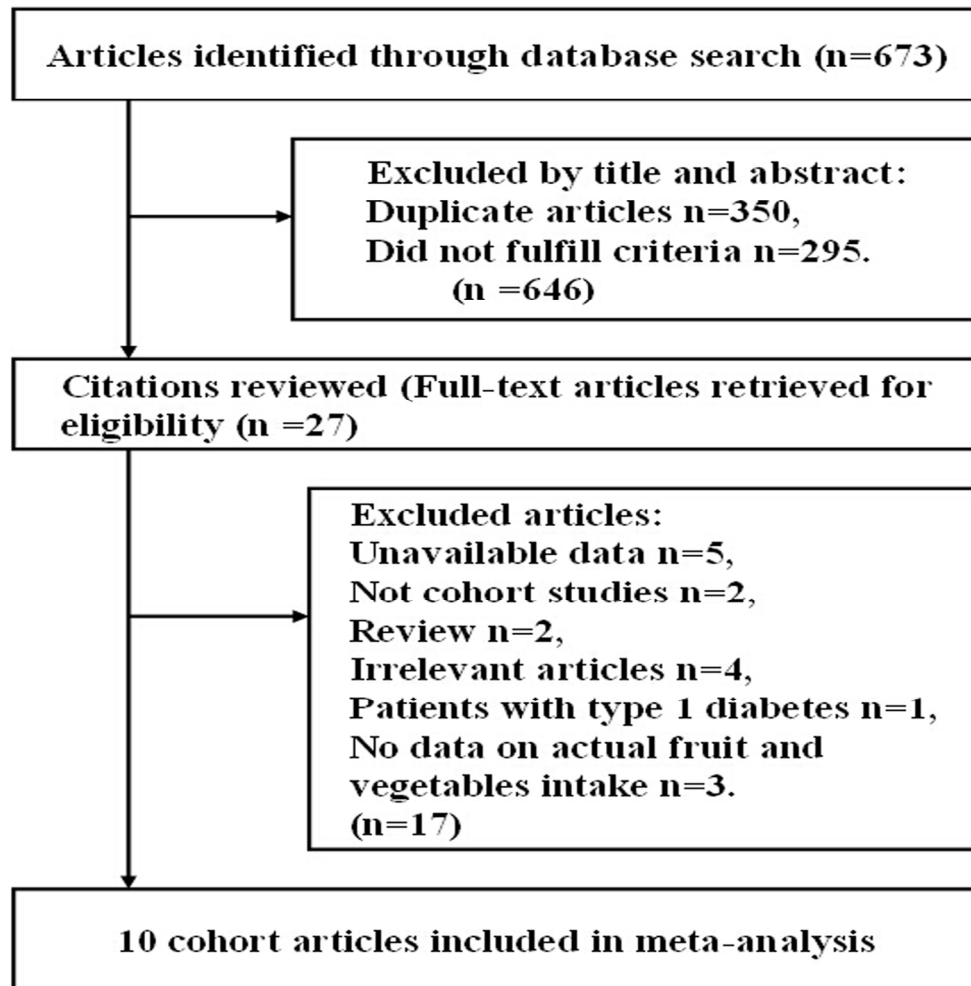

149x149mm (300 x 300 DPI)

BMJ



1  
2  
3  
4  
5  
6  
7  
8  
9  
10  
11  
12  
13  
14  
15  
16  
17  
18  
19  
20  
21  
22  
23  
24  
25  
26  
27  
28  
29  
30  
31  
32  
33  
34  
35  
36  
37  
38  
39  
40  
41  
42  
43  
44  
45  
46  
47  
48  
49  
50  
51  
52  
53  
54  
55  
56  
57  
58  
59  
60

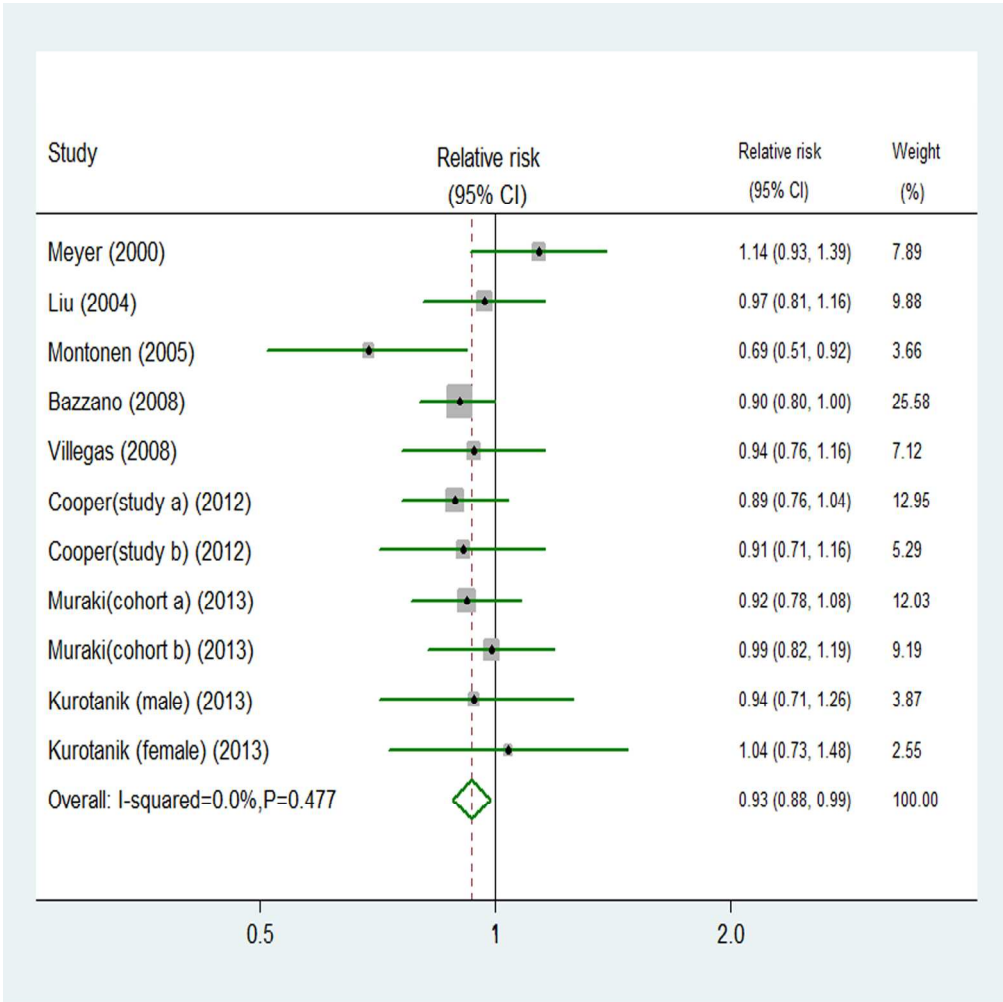

172x172mm (300 x 300 DPI)



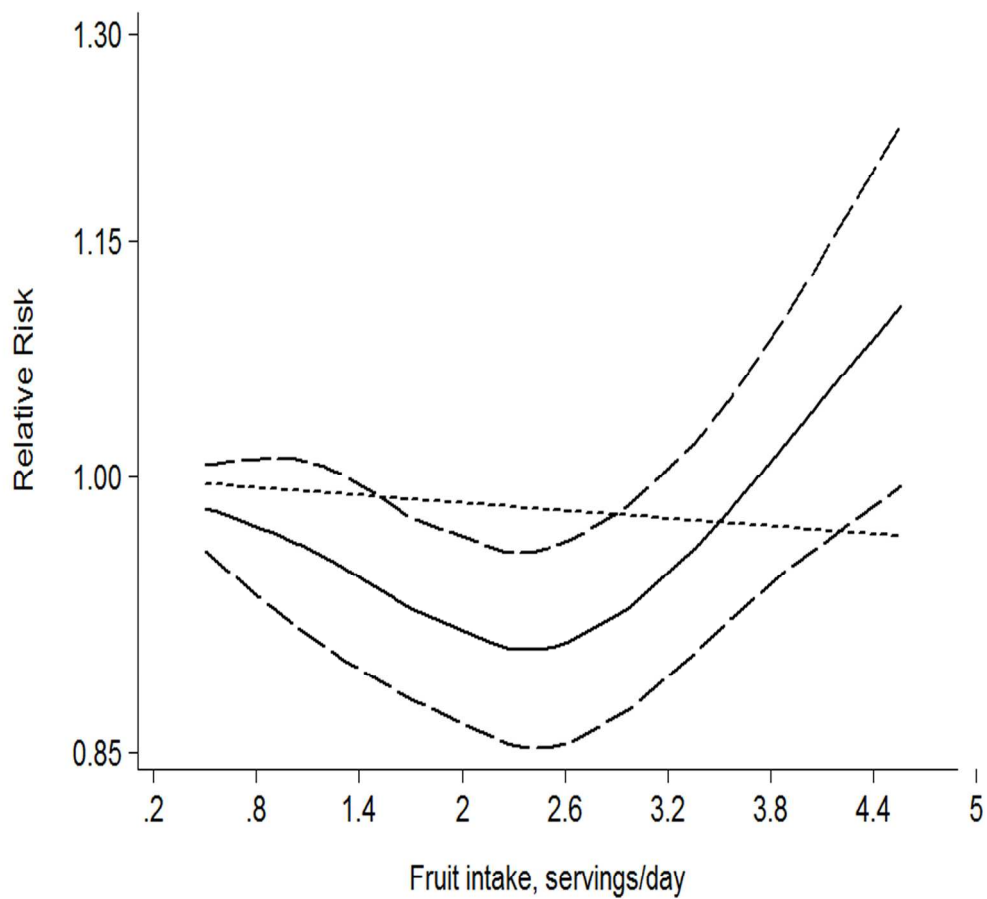

172x172mm (300 x 300 DPI)

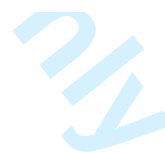



1  
2  
3  
4  
5  
6  
7  
8  
9  
10  
11  
12  
13  
14  
15  
16  
17  
18  
19  
20  
21  
22  
23  
24  
25  
26  
27  
28  
29  
30  
31  
32  
33  
34  
35  
36  
37  
38  
39  
40  
41  
42  
43  
44  
45  
46  
47  
48  
49  
50  
51  
52  
53  
54  
55  
56  
57  
58  
59  
60

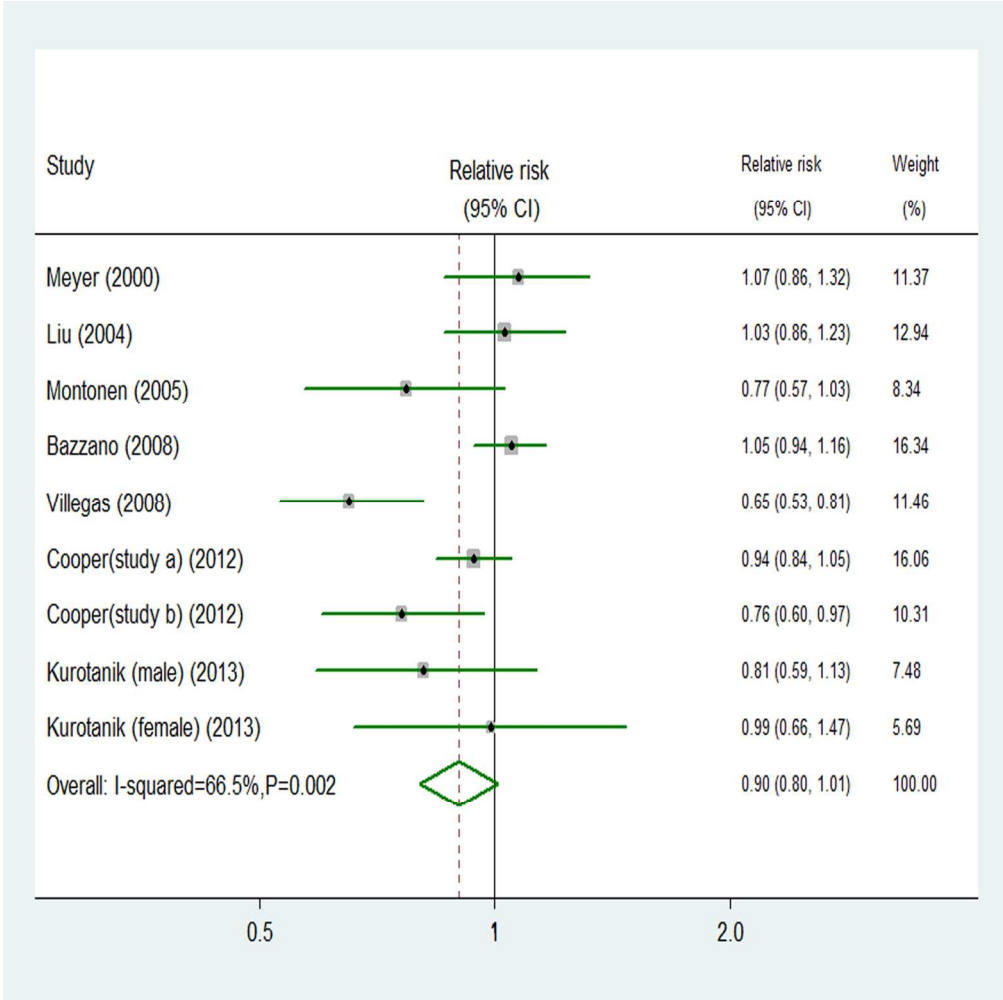

172x172mm (300 x 300 DPI)



1  
2  
3  
4  
5  
6  
7  
8  
9  
10  
11  
12  
13  
14  
15  
16  
17  
18  
19  
20  
21  
22  
23  
24  
25  
26  
27  
28  
29  
30  
31  
32  
33  
34  
35  
36  
37  
38  
39  
40  
41  
42  
43  
44  
45  
46  
47  
48  
49  
50  
51  
52  
53  
54  
55  
56  
57  
58  
59  
60

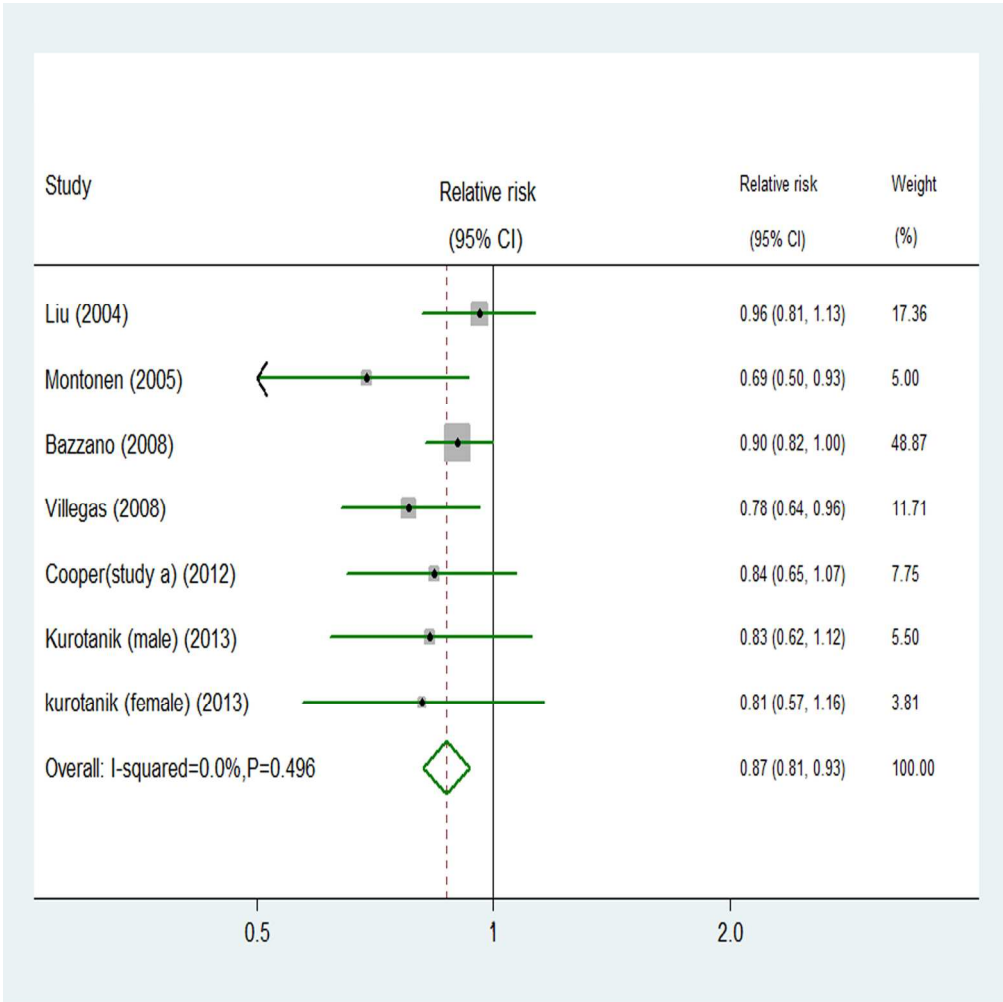

172x172mm (300 x 300 DPI)



1  
2  
3  
4  
5  
6  
7  
8  
9  
10  
11  
12  
13  
14  
15  
16  
17  
18  
19  
20  
21  
22  
23  
24  
25  
26  
27  
28  
29  
30  
31  
32  
33  
34  
35  
36  
37  
38  
39  
40  
41  
42  
43  
44  
45  
46  
47  
48  
49  
50  
51  
52  
53  
54  
55  
56  
57  
58  
59  
60

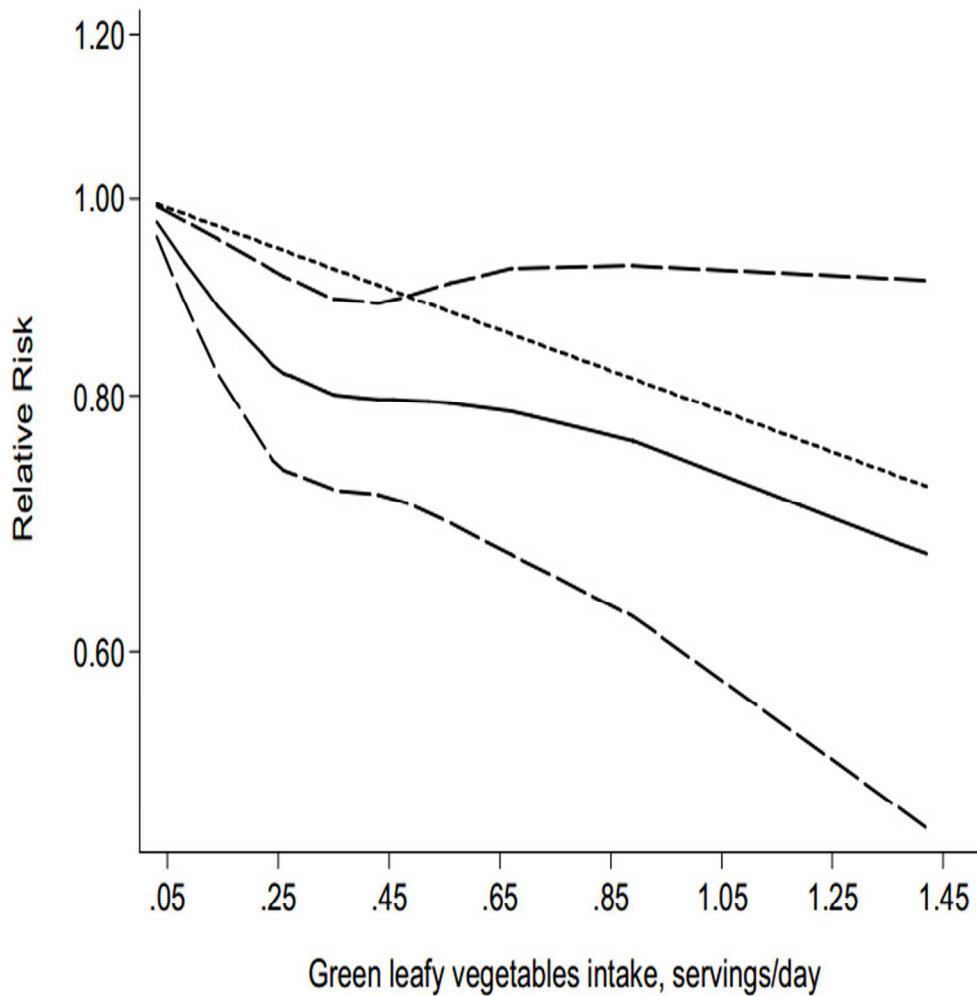

172x172mm (300 x 300 DPI)



Table A. Characteristics of included studies of fruit and vegetables intake in relation to incident type 2 diabetes

| First author                          | Country/<br>cohort                     | Age<br>(years)<br>/Sex | No of<br>total/follow<br>-up(years) | No of cases<br>/non-cases | Assessment<br>of type 2<br>diabetes                                              | Measure of intake                                                                                                                                                            | Highest/lowest<br>intakes as<br>servings/day                                                                                      | Adjustments                                                                                                                               | Quality<br>score |
|---------------------------------------|----------------------------------------|------------------------|-------------------------------------|---------------------------|----------------------------------------------------------------------------------|------------------------------------------------------------------------------------------------------------------------------------------------------------------------------|-----------------------------------------------------------------------------------------------------------------------------------|-------------------------------------------------------------------------------------------------------------------------------------------|------------------|
| Meyer et al<br>2000, <sup>44</sup>    | USA/Iowa<br>Women's<br>Health<br>Study | 55-69/F                | 35988/6                             | 1141/3484<br>7            | Based on self<br>reported                                                        | 127 item FFQ. Calculated<br>servings/day for fruit,<br>vegetables, and combined.<br>Data divided into fifths                                                                 | Fruit: 3.36/0.57.<br>Vegetables:<br>5.93/1.57. Fruit<br>and vegetables:<br>8.86/2.57                                              | Age, BMI, total energy<br>intake, WHR,<br>education, smoking,<br>alcohol intake, physical<br>activity                                     | 2                |
| Ford et al<br>2001, <sup>15</sup>     | USA/NHA<br>NES I                       | 25-74/M<br>and F       | 9665/20                             | 1018/8647                 | Confirmed<br>by self report<br>or hospital<br>records or<br>death<br>certificate | 24 hour recall. Calculated<br>servings/week for fruit and<br>vegetables combined. Data<br>divided into thirds                                                                | Fruit and<br>vegetables: $\geq 5/0$                                                                                               | Age, BMI, smoking,<br>SBP, cholesterol,<br>antihypertensive<br>medication, exercise,<br>alcohol, education,<br>ethnicity                  | 1                |
| Liu et al<br>2004, <sup>45</sup>      | USA/Wom<br>en's Health<br>Study        | $\geq 45/F$            | 38018/8.8                           | 1614/3640<br>4            | Based on self<br>reported                                                        | 131 item FFQ. Calculated<br>servings/day for fruit,<br>vegetables and combined.<br>Defined green leafy<br>vegetables as<br>spinach/kale/lettuce. Data<br>divided into fifths | Fruit: 3.91/0.62.<br>Vegetables:<br>6.84/1.47. Fruit<br>and vegetables:<br>10.16/2.54.<br>Green leafy<br>vegetables:<br>1.42/0.14 | Age, BMI, smoking,<br>total calories, alcohol,<br>exercise, history of<br>hypertension/high<br>cholesterol, family<br>history of diabetes | 3                |
| Montonen et al<br>2005, <sup>46</sup> | Finland/Fin<br>nish                    | 40-69/M<br>and F       | 4304/23                             | 383/3921                  | Confirmed<br>via social                                                          | Dietary history interview.<br>Calculated g/day for fruit                                                                                                                     | Fruit: $> 1.47/ <$<br>0.31. Vegetables:                                                                                           | Age, BMI, sex,<br>smoking, energy intake,                                                                                                 | 3                |

1  
2  
3  
4  
5  
6  
7  
8  
9  
10  
11  
12  
13  
14  
15  
16  
17  
18  
19  
20  
21  
22  
23  
24  
25  
26  
27  
28  
29  
30  
31  
32  
33  
34  
35  
36  
37  
38  
39  
40  
41  
42  
43  
44  
45  
46  
47  
48  
49



insurance and vegetables separately. > 1.23/ < 0.4. family history of register Data divided into fifths Green leafy diabetes, geographic vegetables: > area 0.4/<0.1

|                                           |                                     |               |           |             |                                                                          |                                                                                                                                                              |                                                                                 |                                                                                                                                                              |   |
|-------------------------------------------|-------------------------------------|---------------|-----------|-------------|--------------------------------------------------------------------------|--------------------------------------------------------------------------------------------------------------------------------------------------------------|---------------------------------------------------------------------------------|--------------------------------------------------------------------------------------------------------------------------------------------------------------|---|
| Bazzano et al 2008, <sup>43</sup>         | USA/Nurses' Health Study            | 30-55/F       | 71346/187 | 4529/6681   | Confirmed if met WHO criteria (before 1997) or ADA criteria (after 1998) | 61 item FFQ. Calculated servings/day for fruit, vegetables and combined. Defined green leafy vegetables as spinach/kale/lettuce. Data divided into fifths    | Fruit: 2.5/0.5. Vegetables: 5.2/1.5. Fruit and Vegetables: 7.5/2.1              | Age, BMI, physical activity, smoking, alcohol, hormone therapy, family history of diabetes, total energy intake                                              | 4 |
| Villegas et al 2008, <sup>47</sup>        | China/Shanghai Women's Health Study | 40-70/F       | 64191/4.6 | 896/63295   | Confirmed by ADA criteria                                                | 77 item FFQ. Calculated g/day for fruit and vegetables separately. Defined green leafy vegetables as greens/Chinese greens/spinach. Data divided into fifths | Fruit: 4.56/0.82. Vegetables: 4.04/1.15. Green leafy vegetables: 1.28/0.26      | Age, BMI, WHR, education, smoking, alcohol, hypertension, disease history, hormone use, occupational history, physical activity, income, daily energy intake | 4 |
| Cooper et al (study a) 2012, <sup>5</sup> | 8countries/EPIC-Inter Act study     | 40-79/M and F | 24939/11  | 10821/14118 | Based on self reported                                                   | Country specific dietary questionnaires. Calculated g/day for fruit, vegetables and combined. Defined green leafy vegetables as                              | Fruit: 5.39/0.75. Vegetables: 3.94/0.88. Fruit and Vegetables: 8.71/2.13. Green | Age, BMI, sex, education, centre, physical activity, smoking, total energy intake, alcohol                                                                   | 2 |

|    |                     |                                          |         |          |           |                                         |                                                                                                    |                                                                    |                                                                                                                                                              |   |
|----|---------------------|------------------------------------------|---------|----------|-----------|-----------------------------------------|----------------------------------------------------------------------------------------------------|--------------------------------------------------------------------|--------------------------------------------------------------------------------------------------------------------------------------------------------------|---|
|    |                     |                                          |         |          |           |                                         | chard/endive/lettuce/borage<br>/watercress/beet<br>leaves/spinach. Data<br>divided into quarters   | leafy vegetables:<br>5.93/0.05                                     |                                                                                                                                                              |   |
| 11 | Cooper et al        | England/England                          | 40-79/M | 3704/11  | 653/3051  | Based on self reported                  | 117 item FFQ. Calculated servings/day for fruit, vegetables and combined. Data divided into thirds | Fruit: 3.4/0.6. Vegetables: 2.6/1.1. Fruit and Vegetables: 5.7/2.1 | Age, BMI, sex, waist circumference, education, TDI, occupational social class, smoking, physical activity, family history of diabetes, energy intake, season | 2 |
| 12 | (study              | b) PIC-Norfolk                           | and F   |          |           |                                         |                                                                                                    |                                                                    |                                                                                                                                                              |   |
| 13 | 2012, <sup>10</sup> |                                          |         |          |           |                                         |                                                                                                    |                                                                    |                                                                                                                                                              |   |
| 14 |                     |                                          |         |          |           |                                         |                                                                                                    |                                                                    |                                                                                                                                                              |   |
| 15 |                     |                                          |         |          |           |                                         |                                                                                                    |                                                                    |                                                                                                                                                              |   |
| 16 |                     |                                          |         |          |           |                                         |                                                                                                    |                                                                    |                                                                                                                                                              |   |
| 17 |                     |                                          |         |          |           |                                         |                                                                                                    |                                                                    |                                                                                                                                                              |   |
| 18 |                     |                                          |         |          |           |                                         |                                                                                                    |                                                                    |                                                                                                                                                              |   |
| 19 |                     |                                          |         |          |           |                                         |                                                                                                    |                                                                    |                                                                                                                                                              |   |
| 20 |                     |                                          |         |          |           |                                         |                                                                                                    |                                                                    |                                                                                                                                                              |   |
| 21 |                     |                                          |         |          |           |                                         |                                                                                                    |                                                                    |                                                                                                                                                              |   |
| 22 |                     |                                          |         |          |           |                                         |                                                                                                    |                                                                    |                                                                                                                                                              |   |
| 23 | Muraki et al        | USA/Nurses' Health Study II              | 24-44/F | 91246/8  | 741/90505 | Confirmed by ADA criteria (after 1998)  | 133 item FFQ. Calculated servings/week for fruit. Data divided into fifths                         | Fruit: $\geq 3 / < 0.57$                                           | Age, BMI, ethnicity, smoking, multivitamin use, physical activity, family history of diabetes, hormone use, oral contraceptive use, total energy intake      | 4 |
| 24 | (cohort             | a)                                       |         |          |           |                                         |                                                                                                    |                                                                    |                                                                                                                                                              |   |
| 25 | 2013, <sup>11</sup> |                                          |         |          |           |                                         |                                                                                                    |                                                                    |                                                                                                                                                              |   |
| 26 |                     |                                          |         |          |           |                                         |                                                                                                    |                                                                    |                                                                                                                                                              |   |
| 27 |                     |                                          |         |          |           |                                         |                                                                                                    |                                                                    |                                                                                                                                                              |   |
| 28 |                     |                                          |         |          |           |                                         |                                                                                                    |                                                                    |                                                                                                                                                              |   |
| 29 |                     |                                          |         |          |           |                                         |                                                                                                    |                                                                    |                                                                                                                                                              |   |
| 30 |                     |                                          |         |          |           |                                         |                                                                                                    |                                                                    |                                                                                                                                                              |   |
| 31 |                     |                                          |         |          |           |                                         |                                                                                                    |                                                                    |                                                                                                                                                              |   |
| 32 | Muraki et al        | USA/Health Professionals Follow-up Study | 40-75/M | 42504/12 | 1321/4118 | Confirmed by WHO criteria (before 1997) | 131 item FFQ. Calculated servings/month or servings/week for fruit. Data divided into fifths       | Fruit: $\geq 3 / < 0.57$                                           | Age, BMI, ethnicity, smoking, multivitamin use, physical activity, family history of diabetes, hormone use, oral contraceptive use,                          | 4 |
| 33 | (cohort             | b)                                       |         |          |           |                                         |                                                                                                    |                                                                    |                                                                                                                                                              |   |
| 34 | 2013, <sup>11</sup> |                                          |         |          |           |                                         |                                                                                                    |                                                                    |                                                                                                                                                              |   |
| 35 |                     |                                          |         |          |           |                                         |                                                                                                    |                                                                    |                                                                                                                                                              |   |
| 36 |                     |                                          |         |          |           |                                         |                                                                                                    |                                                                    |                                                                                                                                                              |   |
| 37 |                     |                                          |         |          |           |                                         |                                                                                                    |                                                                    |                                                                                                                                                              |   |
| 38 |                     |                                          |         |          |           |                                         |                                                                                                    |                                                                    |                                                                                                                                                              |   |
| 39 |                     |                                          |         |          |           |                                         |                                                                                                    |                                                                    |                                                                                                                                                              |   |
| 40 |                     |                                          |         |          |           |                                         |                                                                                                    |                                                                    |                                                                                                                                                              |   |
| 41 |                     |                                          |         |          |           |                                         |                                                                                                    |                                                                    |                                                                                                                                                              |   |
| 42 |                     |                                          |         |          |           |                                         |                                                                                                    |                                                                    |                                                                                                                                                              |   |
| 43 |                     |                                          |         |          |           |                                         |                                                                                                    |                                                                    |                                                                                                                                                              |   |
| 44 |                     |                                          |         |          |           |                                         |                                                                                                    |                                                                    |                                                                                                                                                              |   |
| 45 |                     |                                          |         |          |           |                                         |                                                                                                    |                                                                    |                                                                                                                                                              |   |
| 46 |                     |                                          |         |          |           |                                         |                                                                                                    |                                                                    |                                                                                                                                                              |   |
| 47 |                     |                                          |         |          |           |                                         |                                                                                                    |                                                                    |                                                                                                                                                              |   |
| 48 |                     |                                          |         |          |           |                                         |                                                                                                    |                                                                    |                                                                                                                                                              |   |
| 49 |                     |                                          |         |          |           |                                         |                                                                                                    |                                                                    |                                                                                                                                                              |   |

1  
2  
3  
4  
5  
6  
7  
8  
9  
10  
11  
12  
13  
14  
15  
16  
17  
18  
19  
20  
21  
22  
23  
24  
25  
26  
27  
28  
29  
30  
31  
32  
33  
34  
35  
36  
37  
38  
39  
40  
41  
42  
43  
44  
45  
46  
47  
48  
49

|                                    |                   |               |         |           |                        |                                                                                                                                                                                                                                  |   |                                                                                                                                                                                                                          |                                                                                                                                                                                                       |   |
|------------------------------------|-------------------|---------------|---------|-----------|------------------------|----------------------------------------------------------------------------------------------------------------------------------------------------------------------------------------------------------------------------------|---|--------------------------------------------------------------------------------------------------------------------------------------------------------------------------------------------------------------------------|-------------------------------------------------------------------------------------------------------------------------------------------------------------------------------------------------------|---|
| Kurotanik et al 2013, <sup>7</sup> | Japan/JPH C Study | 40-69/M and F | 48437/5 | 896/47541 | Based on self reported | 147 item FFQ. Calculated g/day for fruit, vegetables and combined. Defined green leafy vegetables as spinach/Chinese chives/garland chrysanthemums/cbingensa i/leaf mustard/mugwort/chard/ko matsuna. Data divided into quarters | M | Fruit: 3.42/0.34. Vegetables: 3.35/0.71. Fruit and Vegetables: 6.48/1.38. Green leafy vegetables: 0.45/0.04. F Fruit: 4.60/0.7. Vegetables: 3.84/0.94. Fruit and Vegetables: 8.1/1.98. Green leafy vegetables: 0.54/0.07 | total energy intake<br>Age, BMI, public health centre area, smoking, alcohol, leisure-time activity, history of hypertension, coffee, family history of diabetes, Mg intake, Ca intake, energy intake | 3 |
|------------------------------------|-------------------|---------------|---------|-----------|------------------------|----------------------------------------------------------------------------------------------------------------------------------------------------------------------------------------------------------------------------------|---|--------------------------------------------------------------------------------------------------------------------------------------------------------------------------------------------------------------------------|-------------------------------------------------------------------------------------------------------------------------------------------------------------------------------------------------------|---|

---

FFQ=food frequency questionnaire, BMI=body mass index, SBP=systolic blood pressure, TDI=townsend deprivation index, WHR=weight:height ratio, ADA=American Diabetes Association, WHO=World Health Organization, M=male, F=female, study a= the EPIC-InterAct study, study b= the EPIC-Norfolk study, cohort a= the Nurses' Health Study II study, cohort b= the Health Professionals Follow-up Study. The analysis included 13 cohorts among the ten articles, where Ford et al and Kurotani et al study examined male and female separately, Cooper et al have two studies in 2012 and Muraki et al report included data from two independent cohorts.

**Table B. Meta-analysis of intake of fruit and vegetables and risk of type 2 diabetes (highest versus lowest category)**

| Variables              | No of comparisons | Cases/ total | Test of association         | Test of heterogeneity               | Analysis of publication bias        |
|------------------------|-------------------|--------------|-----------------------------|-------------------------------------|-------------------------------------|
|                        |                   |              | Pooled RR (95% CI), P value | Heterogeneity ( $I^2$ , %), P value | Begg's test, Egger's test (P value) |
| Fruit only             | 11                | 22995/424677 | 0.93 (0.88 to 0.99), 0.015  | 0, 0.477                            | 0.533, 0.849                        |
| Vegetables only        | 9                 | 20933/290927 | 0.90 (0.80 to 1.01), 0.068  | 66.5, 0.002                         | 0.602, 0.176                        |
| Fruit and vegetables   | 9                 | 20672/232097 | 0.94 (0.86 to 1.03), 0.202  | 34.6, 0.141                         | 0.348, 0.609                        |
| Green leafy vegetables | 7                 | 19139/251235 | 0.87 (0.81 to 0.93), 0.000  | 0, 0.496                            | 0.133, 0.101                        |



1  
2  
3  
4  
5  
6  
7  
8  
9  
10  
11  
12  
13  
14  
15  
16  
17  
18  
19  
20  
21  
22  
23  
24  
25  
26  
27  
28  
29  
30  
31  
32  
33  
34  
35  
36  
37  
38  
39  
40  
41  
42  
43  
44  
45  
46  
47  
48  
49  
50  
51  
52  
53  
54  
55  
56  
57  
58  
59  
60



172x172mm (300 x 300 DPI)



1  
2  
3  
4  
5  
6  
7  
8  
9  
10  
11  
12  
13  
14  
15  
16  
17  
18  
19  
20  
21  
22  
23  
24  
25  
26  
27  
28  
29  
30  
31  
32  
33  
34  
35  
36  
37  
38  
39  
40  
41  
42  
43  
44  
45  
46  
47  
48  
49  
50  
51  
52  
53  
54  
55  
56  
57  
58  
59  
60

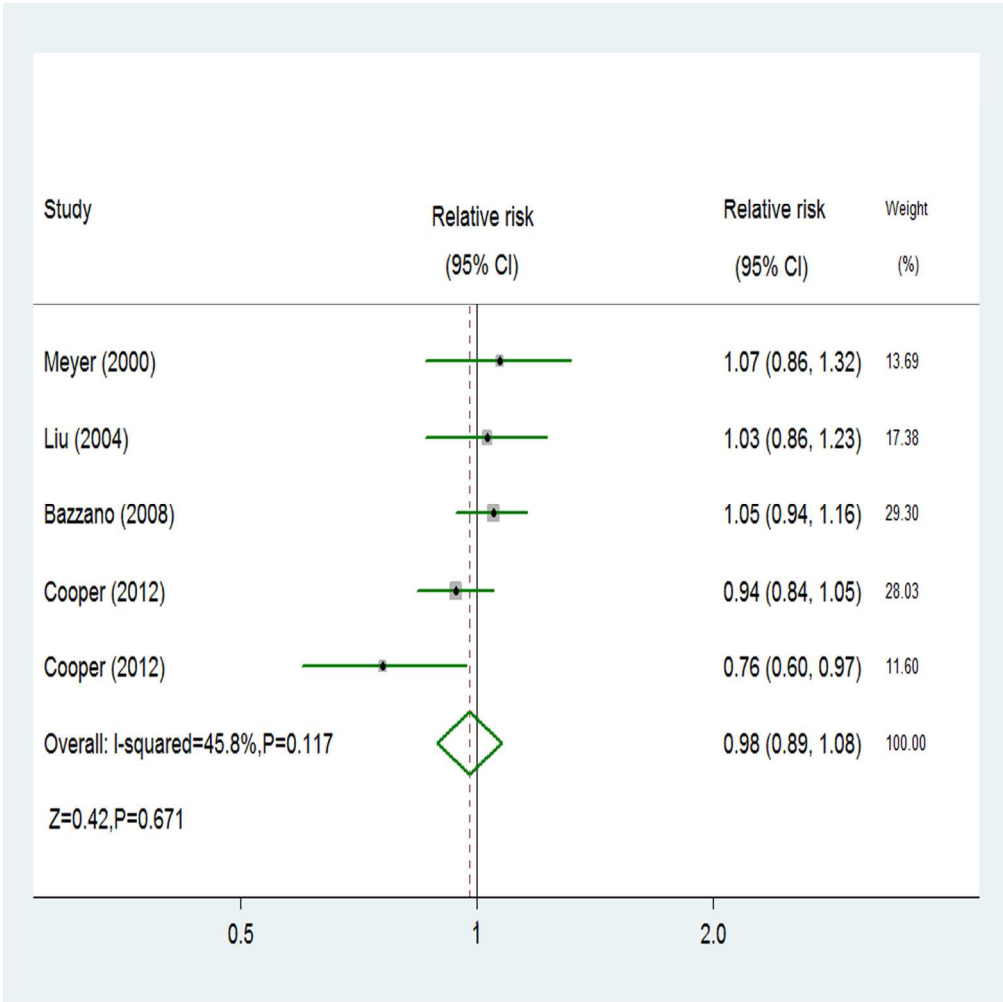

160x160mm (300 x 300 DPI)



1  
2  
3  
4  
5  
6  
7  
8  
9  
10  
11  
12  
13  
14  
15  
16  
17  
18  
19  
20  
21  
22  
23  
24  
25  
26  
27  
28  
29  
30  
31  
32  
33  
34  
35  
36  
37  
38  
39  
40  
41  
42  
43  
44  
45  
46  
47  
48  
49  
50  
51  
52  
53  
54  
55  
56  
57  
58  
59  
60



172x172mm (300 x 300 DPI)



1  
2  
3  
4  
5  
6  
7  
8  
9  
10  
11  
12  
13  
14  
15  
16  
17  
18  
19  
20  
21  
22  
23  
24  
25  
26  
27  
28  
29  
30  
31  
32  
33  
34  
35  
36  
37  
38  
39  
40  
41  
42  
43  
44  
45  
46  
47  
48  
49  
50  
51  
52  
53  
54  
55  
56  
57  
58  
59  
60

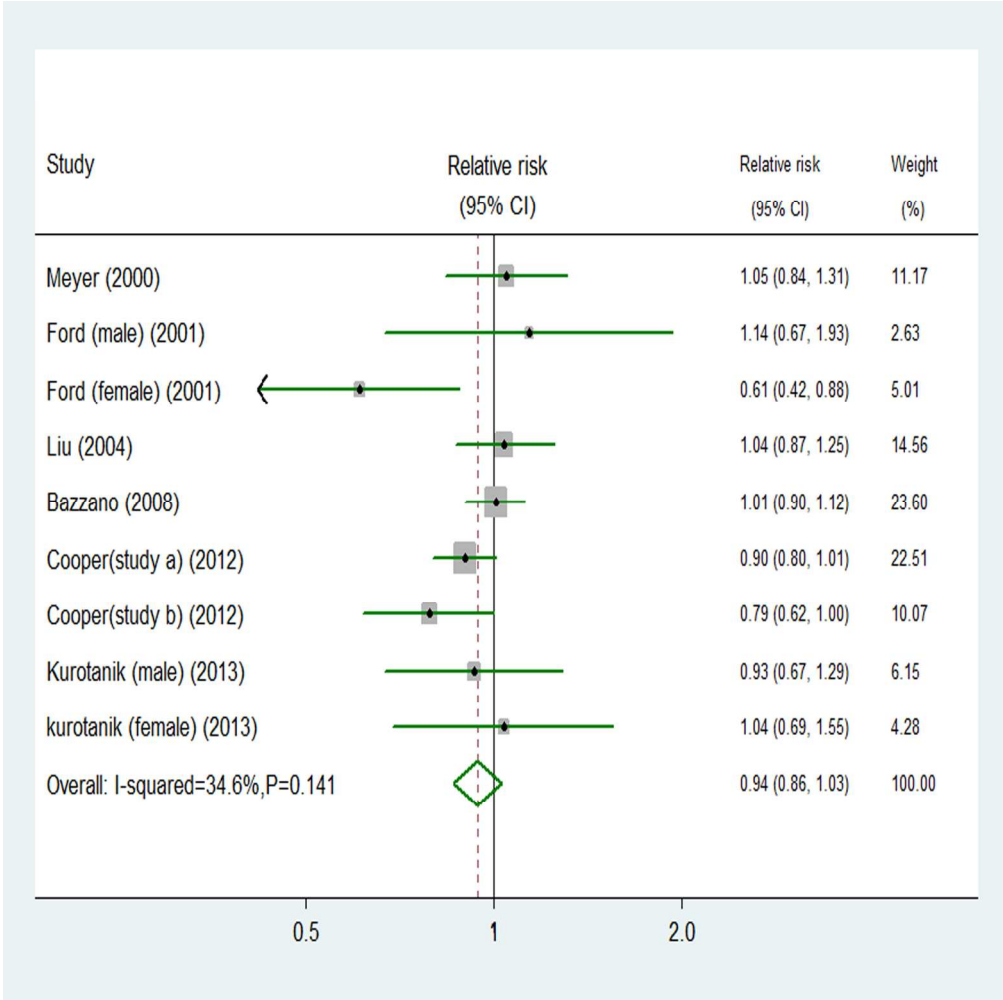

172x172mm (300 x 300 DPI)



1  
2  
3  
4  
5  
6  
7  
8  
9  
10  
11  
12  
13  
14  
15  
16  
17  
18  
19  
20  
21  
22  
23  
24  
25  
26  
27  
28  
29  
30  
31  
32  
33  
34  
35  
36  
37  
38  
39  
40  
41  
42  
43  
44  
45  
46  
47  
48  
49  
50  
51  
52  
53  
54  
55  
56  
57  
58  
59  
60



172x172mm (300 x 300 DPI)



1  
2  
3  
4  
5  
6  
7  
8  
9  
10  
11  
12  
13  
14  
15  
16  
17  
18  
19  
20  
21  
22  
23  
24  
25  
26  
27  
28  
29  
30  
31  
32  
33  
34  
35  
36  
37  
38  
39  
40  
41  
42  
43  
44  
45  
46  
47  
48  
49  
50  
51  
52  
53  
54  
55  
56  
57  
58  
59  
60



170x170mm (300 x 300 DPI)



1  
2  
3  
4  
5  
6  
7  
8  
9  
10  
11  
12  
13  
14  
15  
16  
17  
18  
19  
20  
21  
22  
23  
24  
25  
26  
27  
28  
29  
30  
31  
32  
33  
34  
35  
36  
37  
38  
39  
40  
41  
42  
43  
44  
45  
46  
47  
48  
49  
50  
51  
52  
53  
54  
55  
56  
57  
58  
59  
60

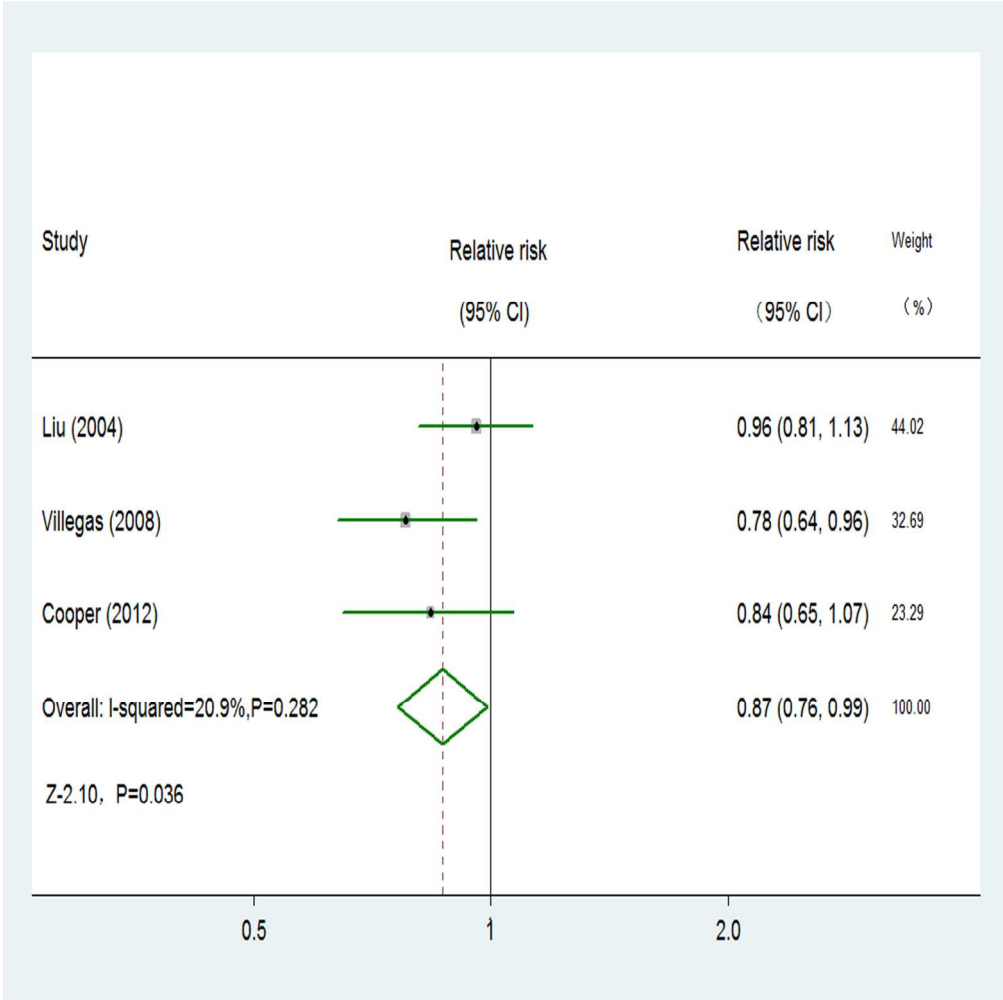

150x150mm (300 x 300 DPI)





## MOOSE Checklist

### **Fruit and vegetable intake and risk of type 2 diabetes mellitus: meta-analysis of prospective cohort studies**

Min Li *master student*<sup>1</sup>, Yingli Fan *master student*<sup>2</sup>, Xiaowei Zhang *master student*<sup>1</sup>,  
Wenshang Hou *master student*<sup>1</sup>, Zhenyu Tang *associate professor*<sup>1</sup>

<sup>1</sup>Department of Neurology, The Second Affiliated Hospital of Nanchang University,  
Nanchang 330006, Jiangxi Province, People's Republic of China;

<sup>2</sup>Department of Cardiovascular, The Second Affiliated Hospital of Nanchang University,  
Nanchang 330006, Jiangxi Province, People's Republic of China

Correspondence to: Z Tang, Department of Neurology, The Second Affiliated Hospital of  
Nanchang University, No. 1, Minde Road, Nanchang, Jiangxi 330006, People's Republic  
of China

Email: [zytang07016@sina.com](mailto:zytang07016@sina.com)

| Criteria                                                                        | Brief description of how the criteria were handled in the meta-analysis                                                                                                                                                                                                                                                                                                                                                                                                                                                                                                                                                                                                                                               |
|---------------------------------------------------------------------------------|-----------------------------------------------------------------------------------------------------------------------------------------------------------------------------------------------------------------------------------------------------------------------------------------------------------------------------------------------------------------------------------------------------------------------------------------------------------------------------------------------------------------------------------------------------------------------------------------------------------------------------------------------------------------------------------------------------------------------|
| <b>Reporting of background should include</b>                                   |                                                                                                                                                                                                                                                                                                                                                                                                                                                                                                                                                                                                                                                                                                                       |
| √ Problem definition                                                            | Type 2 diabetes (T2D) is one of the most common noncommunicable diseases which is expected to affect in excess of 439 million adults worldwide by 2030, with serious consequences for health care expenditure. The prevention of T2D is thus clearly an important public health priority. Among the known risk factors for T2D, dietary factors have aroused particular attention. Lifestyle intervention trials that include dietary modification have been shown to be effective in delaying or preventing the development of T2D. Although the effect of individual components or interactions between nutrients is still largely unknown, fruit and vegetables intake may explain some of this beneficial effect. |
| √ Hypothesis statement                                                          | Fruit and vegetable intake decrease risk of type 2 diabetes mellitus.                                                                                                                                                                                                                                                                                                                                                                                                                                                                                                                                                                                                                                                 |
| √ Description of study outcomes                                                 | Type 2 diabetes mellitus.                                                                                                                                                                                                                                                                                                                                                                                                                                                                                                                                                                                                                                                                                             |
| √ Type of exposure or intervention used                                         | Fruit, vegetables, or green leafy vegetables                                                                                                                                                                                                                                                                                                                                                                                                                                                                                                                                                                                                                                                                          |
| √ Type of study designs used                                                    | We included (1) original studies (eg, not review articles, meeting abstracts, editorials, or commentaries); (2) prospective design (eg, not cross sectional design, case-control design).                                                                                                                                                                                                                                                                                                                                                                                                                                                                                                                             |
| √ Study population                                                              | We placed no restriction.                                                                                                                                                                                                                                                                                                                                                                                                                                                                                                                                                                                                                                                                                             |
| <b>Reporting of search strategy should include</b>                              |                                                                                                                                                                                                                                                                                                                                                                                                                                                                                                                                                                                                                                                                                                                       |
| √ Qualifications of searchers                                                   | The credentials of the two investigators XZ and WH are indicated in the author list.                                                                                                                                                                                                                                                                                                                                                                                                                                                                                                                                                                                                                                  |
| √ Search strategy, including time period included in the synthesis and keywords | PubMed from 1965 –February 2014<br>EMBASE from 1974 –February 2014<br>Keywords: (“fruits” OR “vegetables” OR “citrus”) AND (“Type 2 diabetes” OR “non-insulin-dependent diabetes mellitus” OR “Diabetes Mellitus, Type 2” OR “NIDDM” OR “prediabetes” OR “impaired glucose tolerance” OR “impaired fasting glucose” OR “glucose” OR “hyperglycaemia” OR “insulin”) AND (“Follow-up studies” OR “prospective studies” OR “cohort studies” OR “longitudinal studies”).                                                                                                                                                                                                                                                  |
| √ Databases and registries searched                                             | PubMed and EMBASE                                                                                                                                                                                                                                                                                                                                                                                                                                                                                                                                                                                                                                                                                                     |
| √ Search software used, name and version, including special features            | We did not employ a search software. EndNote was used to merge retrieved citations and eliminate duplications                                                                                                                                                                                                                                                                                                                                                                                                                                                                                                                                                                                                         |
| √ Use of hand searching                                                         | We hand-searched bibliographies of retrieved papers for                                                                                                                                                                                                                                                                                                                                                                                                                                                                                                                                                                                                                                                               |

|                                            |                                                                                                                                            |                                                                                                                                                                                                                                                                                                                                                                                                                                                                                                                                                                                                                                                                                                                                                                                         |
|--------------------------------------------|--------------------------------------------------------------------------------------------------------------------------------------------|-----------------------------------------------------------------------------------------------------------------------------------------------------------------------------------------------------------------------------------------------------------------------------------------------------------------------------------------------------------------------------------------------------------------------------------------------------------------------------------------------------------------------------------------------------------------------------------------------------------------------------------------------------------------------------------------------------------------------------------------------------------------------------------------|
|                                            |                                                                                                                                            | additional references,                                                                                                                                                                                                                                                                                                                                                                                                                                                                                                                                                                                                                                                                                                                                                                  |
| √                                          | List of citations located and those excluded, including justifications                                                                     | Details of the literature search process are outlined in the process of literature search and study selection. The citation list is available upon request                                                                                                                                                                                                                                                                                                                                                                                                                                                                                                                                                                                                                              |
| √                                          | Method of addressing articles published in languages other than English                                                                    | We placed no restrictions on language; local scientists fluent in the original language of the article were contacted for translation                                                                                                                                                                                                                                                                                                                                                                                                                                                                                                                                                                                                                                                   |
| √                                          | Method of handling abstracts and unpublished studies                                                                                       | We had contacted a few authors for unpublished studies on the association.                                                                                                                                                                                                                                                                                                                                                                                                                                                                                                                                                                                                                                                                                                              |
| √                                          | Description of any contact with authors                                                                                                    | We contacted authors who had conducted multivariate analysis with diabetes as a covariate, but had not reported relative risk for fruit, vegetables, or green leafy vegetables.                                                                                                                                                                                                                                                                                                                                                                                                                                                                                                                                                                                                         |
| <b>Reporting of methods should include</b> |                                                                                                                                            |                                                                                                                                                                                                                                                                                                                                                                                                                                                                                                                                                                                                                                                                                                                                                                                         |
| √                                          | Description of relevance or appropriateness of studies assembled for assessing the hypothesis to be tested                                 | Detailed inclusion and exclusion criteria were described in the methods section.                                                                                                                                                                                                                                                                                                                                                                                                                                                                                                                                                                                                                                                                                                        |
| √                                          | Rationale for the selection and coding of data                                                                                             | Data extracted from each of the studies were relevant to the population characteristics, study design, exposure, outcome, and possible effect modifiers of the association.                                                                                                                                                                                                                                                                                                                                                                                                                                                                                                                                                                                                             |
| √                                          | Assessment of confounding                                                                                                                  | Restricted the analysis to age-adjusted estimates only. Conducted sensitivity analyses by eliminating studies that had not adjusted for possible confounders.                                                                                                                                                                                                                                                                                                                                                                                                                                                                                                                                                                                                                           |
| √                                          | Assessment of study quality, including blinding of quality assessors; stratification or regression on possible predictors of study results | Quality was assessed with a total score from 0 to 6 points. The system was created to account for study eligibility (1 point for appropriate inclusion and exclusion criteria), outcome (1 point if diagnosis of T2D was based on accepted clinical criteria, and not solely based on self-report), exposure (1 point if fruit and vegetables consumption were assessed with a validated tool, and 1 point if fruit and vegetables consumption were appropriately categorized), statistical analysis (1 point was given if adjustment included a few variables such as age, sex, body mass index, and family history of T2D, these being proven risk factors for T2D). Another point was given for any other factors were adjusted (such as alcohol, education, and physical activity). |
| √                                          | Assessment of heterogeneity                                                                                                                | Heterogeneity of the studies were explored within two types of study designs using Cochrane's Q test of heterogeneity and $I^2$ statistic that provides the relative amount of variance of the summary effect due to the between-study heterogeneity.                                                                                                                                                                                                                                                                                                                                                                                                                                                                                                                                   |
| √                                          | Description of statistical methods in sufficient detail to be replicated                                                                   | Description of methods of meta-analyses, sensitivity analyses, subgroup analyses and assessment of publication bias are detailed in the methods.                                                                                                                                                                                                                                                                                                                                                                                                                                                                                                                                                                                                                                        |

|    |   |                                                                   |                                                                                                                                                                                                                                                                                                                                                                            |
|----|---|-------------------------------------------------------------------|----------------------------------------------------------------------------------------------------------------------------------------------------------------------------------------------------------------------------------------------------------------------------------------------------------------------------------------------------------------------------|
| 1  | √ | Provision of appropriate tables and graphics                      | We included 1 flow chart, several summary tables and figures.                                                                                                                                                                                                                                                                                                              |
| 2  |   |                                                                   |                                                                                                                                                                                                                                                                                                                                                                            |
| 3  |   |                                                                   |                                                                                                                                                                                                                                                                                                                                                                            |
| 4  |   |                                                                   |                                                                                                                                                                                                                                                                                                                                                                            |
| 5  |   |                                                                   |                                                                                                                                                                                                                                                                                                                                                                            |
| 6  |   | <b>Reporting of results should include</b>                        |                                                                                                                                                                                                                                                                                                                                                                            |
| 7  |   |                                                                   |                                                                                                                                                                                                                                                                                                                                                                            |
| 8  | √ | Graph summarizing individual study estimates and overall estimate | Figure 2, 4, 5 and D                                                                                                                                                                                                                                                                                                                                                       |
| 9  |   |                                                                   |                                                                                                                                                                                                                                                                                                                                                                            |
| 10 |   |                                                                   |                                                                                                                                                                                                                                                                                                                                                                            |
| 11 |   |                                                                   |                                                                                                                                                                                                                                                                                                                                                                            |
| 12 | √ | Table giving descriptive information for each study included      | Table A                                                                                                                                                                                                                                                                                                                                                                    |
| 13 |   |                                                                   |                                                                                                                                                                                                                                                                                                                                                                            |
| 14 |   |                                                                   |                                                                                                                                                                                                                                                                                                                                                                            |
| 15 | √ | Results of sensitivity testing                                    | Table 1                                                                                                                                                                                                                                                                                                                                                                    |
| 16 |   |                                                                   |                                                                                                                                                                                                                                                                                                                                                                            |
| 17 |   |                                                                   |                                                                                                                                                                                                                                                                                                                                                                            |
| 18 | √ | Indication of statistical uncertainty of findings                 | 95% confidence intervals were presented with all summary estimates, $I^2$ values and results of sensitivity analyses                                                                                                                                                                                                                                                       |
| 19 |   |                                                                   |                                                                                                                                                                                                                                                                                                                                                                            |
| 20 |   |                                                                   |                                                                                                                                                                                                                                                                                                                                                                            |
| 21 |   | <b>Reporting of discussion should include</b>                     |                                                                                                                                                                                                                                                                                                                                                                            |
| 22 |   |                                                                   |                                                                                                                                                                                                                                                                                                                                                                            |
| 23 |   |                                                                   |                                                                                                                                                                                                                                                                                                                                                                            |
| 24 | √ | Quantitative assessment of bias                                   | Subgroup analyses indicate heterogeneity in strengths of the association due to most common biases in cohort studies.                                                                                                                                                                                                                                                      |
| 25 |   |                                                                   |                                                                                                                                                                                                                                                                                                                                                                            |
| 26 |   |                                                                   |                                                                                                                                                                                                                                                                                                                                                                            |
| 27 | √ | Justification for exclusion                                       | We excluded studies that had not adjusted for or were standardized by age, a potential confounder, and used different exposure or outcome assessment for the comparison groups.                                                                                                                                                                                            |
| 28 |   |                                                                   |                                                                                                                                                                                                                                                                                                                                                                            |
| 29 |   |                                                                   |                                                                                                                                                                                                                                                                                                                                                                            |
| 30 |   |                                                                   |                                                                                                                                                                                                                                                                                                                                                                            |
| 31 |   |                                                                   |                                                                                                                                                                                                                                                                                                                                                                            |
| 32 | √ | Assessment of quality of included studies                         | We discussed the results of the subgroup analyses, and potential reasons for the observed heterogeneity.                                                                                                                                                                                                                                                                   |
| 33 |   |                                                                   |                                                                                                                                                                                                                                                                                                                                                                            |
| 34 |   | <b>Reporting of conclusions should include</b>                    |                                                                                                                                                                                                                                                                                                                                                                            |
| 35 |   |                                                                   |                                                                                                                                                                                                                                                                                                                                                                            |
| 36 |   |                                                                   |                                                                                                                                                                                                                                                                                                                                                                            |
| 37 | √ | Consideration of alternative explanations for observed results    | We discussed that potential unmeasured confounders such as other chronic diseases may have caused residual confounding, but the measured factors that are correlated with such confounders would have mitigated the bias. We noted that the variations in the strengths of association may be due to true population differences, or to differences in quality of studies. |
| 38 |   |                                                                   |                                                                                                                                                                                                                                                                                                                                                                            |
| 39 |   |                                                                   |                                                                                                                                                                                                                                                                                                                                                                            |
| 40 |   |                                                                   |                                                                                                                                                                                                                                                                                                                                                                            |
| 41 |   |                                                                   |                                                                                                                                                                                                                                                                                                                                                                            |
| 42 |   |                                                                   |                                                                                                                                                                                                                                                                                                                                                                            |
| 43 |   |                                                                   |                                                                                                                                                                                                                                                                                                                                                                            |
| 44 |   |                                                                   |                                                                                                                                                                                                                                                                                                                                                                            |
| 45 | √ | Generalization of the conclusions                                 | Our meta-analysis suggests that higher fruit or vegetables, particularly GLV intake is associated with a significantly reduced risk of T2D. In addition, the dose-response relations also indicate that relatively high fruit or GLV may still decrease risk of T2D.                                                                                                       |
| 46 |   |                                                                   |                                                                                                                                                                                                                                                                                                                                                                            |
| 47 |   |                                                                   |                                                                                                                                                                                                                                                                                                                                                                            |
| 48 |   |                                                                   |                                                                                                                                                                                                                                                                                                                                                                            |
| 49 |   |                                                                   |                                                                                                                                                                                                                                                                                                                                                                            |
| 50 |   |                                                                   |                                                                                                                                                                                                                                                                                                                                                                            |
| 51 | √ | Guidelines for future research                                    | We recommend future preferably randomized controlled studies should explore what kind of fruit or GLV can reduce the risk of T2D.                                                                                                                                                                                                                                          |
| 52 |   |                                                                   |                                                                                                                                                                                                                                                                                                                                                                            |
| 53 |   |                                                                   |                                                                                                                                                                                                                                                                                                                                                                            |
| 54 |   |                                                                   |                                                                                                                                                                                                                                                                                                                                                                            |
| 55 | √ | Disclosure of funding source                                      | No separate funding was necessary for the undertaking of this systematic review.                                                                                                                                                                                                                                                                                           |
| 56 |   |                                                                   |                                                                                                                                                                                                                                                                                                                                                                            |
| 57 |   |                                                                   |                                                                                                                                                                                                                                                                                                                                                                            |
| 58 |   |                                                                   |                                                                                                                                                                                                                                                                                                                                                                            |
| 59 |   |                                                                   |                                                                                                                                                                                                                                                                                                                                                                            |
| 60 |   |                                                                   |                                                                                                                                                                                                                                                                                                                                                                            |
